# Supplementary material for: Hypervalent iodine(III)-mediated decarboxylative acetoxylation at tertiary and benzylic carbon centers
Source: publisher site journal article supplement (doi:10.3762/bjoc.14.92), 2018-05-15

# Supporting Information

for

## Hypervalent iodine(III)-mediated decarboxylative acetoxylation at tertiary and benzylic carbon centers

Kensuke Kiyokawa\*, Daichi Okumatsu and Satoshi Minakata\*

Address: Department of Applied Chemistry, Graduate School of Engineering, Osaka University, 2-1 Yamadaoka, Suita, Osaka 565-0871, Japan

Email: Kensuke Kiyokawa - kiyokawa@chem.eng.osaka-u.ac.jp; Satoshi Minakata - minakata@chem.eng.osaka-u.ac.jp

\* Corresponding author

### Experimental procedures, characterization data, copies of the $^1\text{H}$ , $^{13}\text{C}$ , and $^{19}\text{F}$ NMR spectra

#### Table of Contents

|                                                                                                          |     |
|----------------------------------------------------------------------------------------------------------|-----|
| 1. General .....                                                                                         | S2  |
| 2. Materials.....                                                                                        | S2  |
| 3. $^1\text{H}$ NMR monitoring of the reaction mixture of $\text{PhI}(\text{OAc})_2$ and <b>1a</b> ..... | S3  |
| 4. Acetoxylation of alkyl iodide <b>5</b> .....                                                          | S3  |
| 5. Decarboxylative acetoxylation: typical procedure and product data .....                               | S4  |
| 6. Hydrolysis of acetates .....                                                                          | S9  |
| 7. References .....                                                                                      | S10 |
| 8. NMR spectra .....                                                                                     | S11 |

## 1. General

New compounds were characterized by  $^1\text{H}$ ,  $^{13}\text{C}$ ,  $^{19}\text{F}$ , IR, and HRMS.  $^1\text{H}$ ,  $^{13}\text{C}$ , and  $^{19}\text{F}$  NMR spectra were recorded on a JEOL JMT-400/54/SS spectrometer ( $^1\text{H}$  NMR, 400 MHz;  $^{13}\text{C}$  NMR, 100 MHz;  $^{19}\text{F}$  NMR, 377 MHz).  $^1\text{H}$  NMR chemical shifts were determined relative to  $\text{Me}_4\text{Si}$  (0.0 ppm) as an internal standard.  $^{13}\text{C}$  NMR chemical shifts were determined relative to  $\text{CDCl}_3$  (77.0 ppm).  $^{19}\text{F}$  NMR chemical shifts were determined relative to  $\text{C}_6\text{F}_6$  (-164.9 ppm) as an external standard. Infrared spectra were recorded on a SHIMADZU IRAffinity-1 FT-IR Spectrometer. High-resolution mass spectra were obtained on a JMS-700 mass spectrometer. Melting points were determined on a Stanford Research Systems MPA100 OptiMelt Automated Melting Point System. All reactions were carried out under nitrogen. Otherwise noted, reactions were performed on the benchtop with a fluorescent light on the ceiling. Products were purified by chromatography on silica gel BW-300 (Fuji Silysia Chemical Ltd.). Analytical thin-layer chromatography (TLC) was performed on pre-coated silica gel glass plates (Merck silica gel 60  $\text{F}_{254}$  and Fuji Silysia Chromatorex NH, 0.25 mm thickness). Compounds were visualized with UV lamp or treatment with an ethanolic solution of phosphomolybdic acid followed by heating.

## 2. Materials

Starting materials **1a–j** were prepared according to literature procedures.<sup>[1]</sup> Alkyl iodide **5** was prepared according to a literature procedure.<sup>[1]</sup> All other starting materials, solvents, and reagents were purchased and used as obtained.

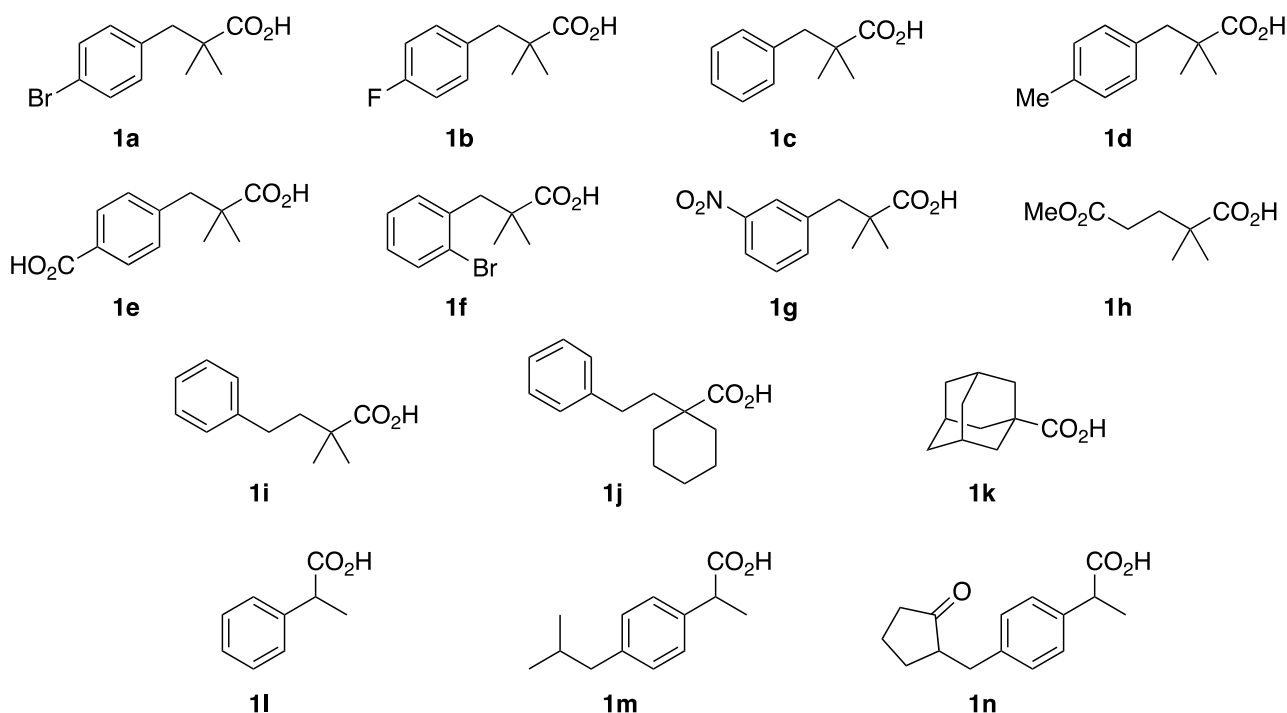

**Figure S1:** List of substrates.

### 3. $^1\text{H}$ NMR monitoring of the reaction mixture of $\text{PhI}(\text{OAc})_2$ and **1a**

The mixture of  $\text{PhI}(\text{OAc})_2$  (64.4 mg, 0.20 mmol) and 3-(4-bromophenyl)-2,2-dimethylpropanoic acid (**1a**, 25.8 mg, 0.10 mmol) in  $\text{CD}_2\text{Cl}_2/\text{CD}_3\text{CO}_2\text{D}$  (v/v = 1:1, 0.50 mL) was prepared. After mixing for 5 min at room temperature, the mixture was transferred into an NMR tube. The resulting  $^1\text{H}$  NMR spectra are shown in Figure S2. The reaction provided a mixture of  $\text{PhI}(\text{OAc})_2$  and **4a** in a ratio of 11:1.

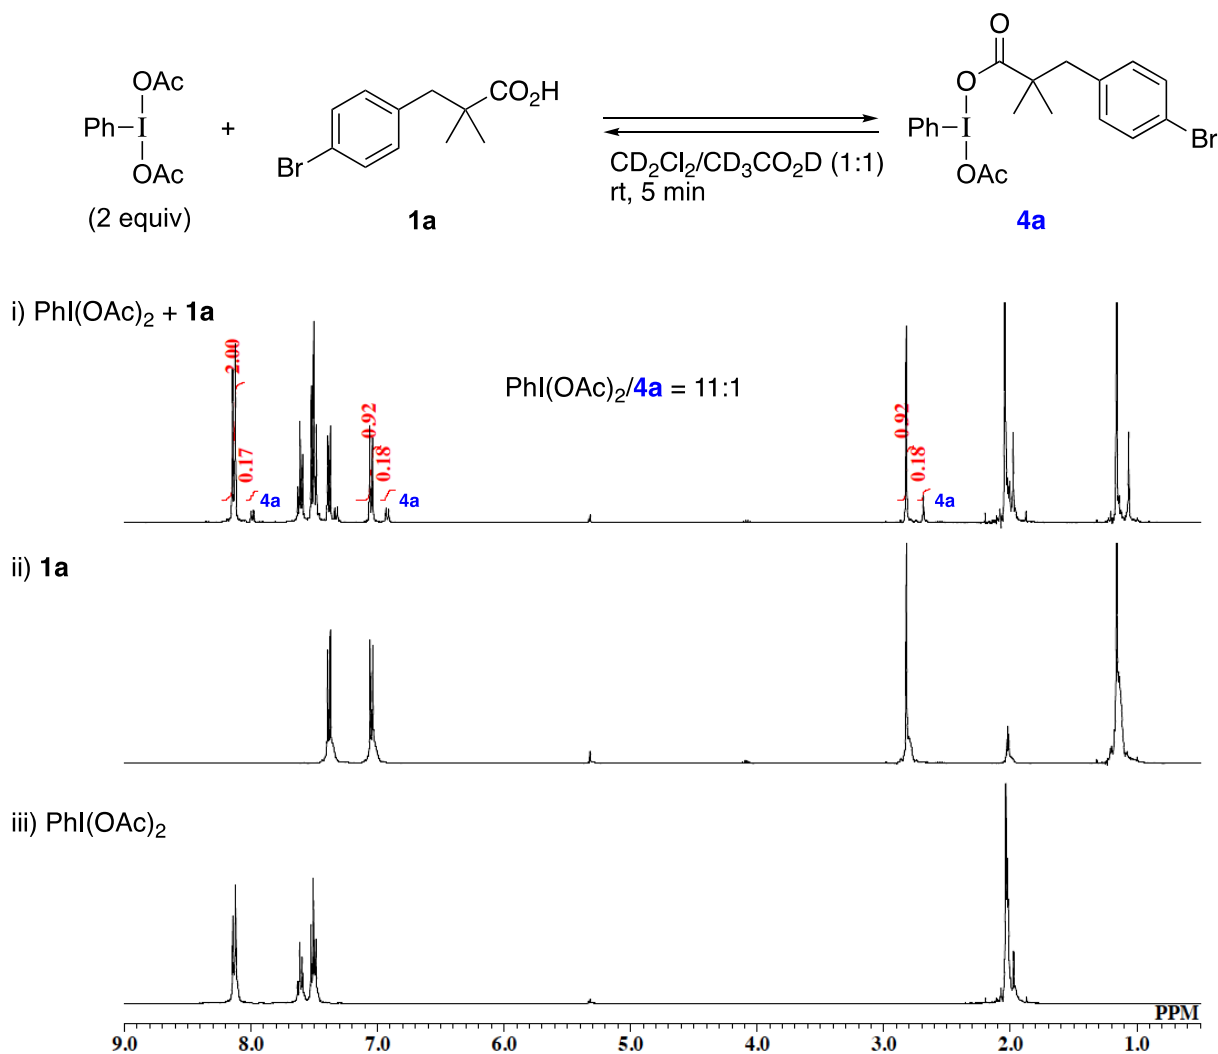

**Figure S2:**  $^1\text{H}$  NMR spectra in  $\text{CD}_2\text{Cl}_2/\text{CD}_3\text{CO}_2\text{D}$  (v/v = 1:1). i) A mixture of **1a** and 2 equivalents of  $\text{PhI}(\text{OAc})_2$ . ii) **1a**. iii)  $\text{PhI}(\text{OAc})_2$ .

### 4. Acetoxylation of alkyl iodide **5**

A heat-gun-dried two-necked reaction flask containing a magnetic stirring bar was charged with (2-iodo-2-methylpropyl)benzene (**5**) (53.9 mg, 0.21 mmol),  $\text{PhI}(\text{OAc})_2$  (64.5 mg, 0.20 mmol), and  $\text{CH}_2\text{Cl}_2/\text{AcOH}$  (v/v = 1:1, 1 mL). The reaction mixture was stirred for 30 min at room temperature. The reaction was quenched by  $\text{Na}_2\text{S}_2\text{O}_3$  aq. (1 M, 5 mL) and sat.  $\text{NaHCO}_3$  aq. (5 mL). The mixture

was extracted with Et<sub>2</sub>O (3 x 10 mL) and the collected organic layers were dried over Na<sub>2</sub>SO<sub>4</sub>. The solution was concentrated under reduced pressure to give the crude product, which was analyzed by <sup>1</sup>H NMR spectroscopy using 1,1,2,2-tetrachloroethane as an internal standard.

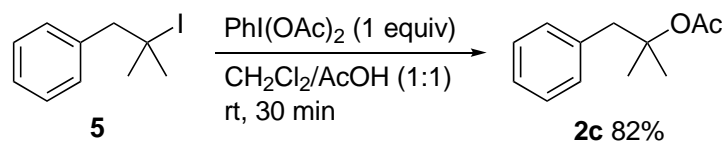

## 5. Decarboxylative acetoxylation: typical procedure and product data

**Typical procedure:** A heat-gun-dried two-necked reaction flask containing a magnetic stirring bar was charged with carboxylic acid **1** (0.5 mmol), PhI(OAc)<sub>2</sub> (1.00 or 1.50 mmol), and CH<sub>2</sub>Cl<sub>2</sub>/AcOH (v/v = 1:1, 1.25 or 2.5 mL). To the mixture, I<sub>2</sub> (0.25 or 0.38 mmol) was added, and the reaction mixture was stirred at room temperature for 6 h. The reaction was quenched by Na<sub>2</sub>S<sub>2</sub>O<sub>3</sub> aq. (1 M, 10 mL) and sat. NaHCO<sub>3</sub> aq. (10 mL). The mixture was extracted with Et<sub>2</sub>O (3 × 20 mL). The collected organic layers were dried over Na<sub>2</sub>SO<sub>4</sub>. The solution was concentrated under reduced pressure to give the crude product, which was analyzed by <sup>1</sup>H NMR spectroscopy using 1,1,2,2-tetrachloroethane as an internal standard. Purification by flash column chromatography on silica gel (hexane/EtOAc) gave the pure product.

### Product data

#### 1-(4-Bromophenyl)-2-methylpropan-2-yl acetate (**2a**)

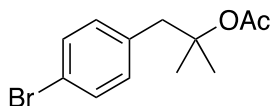

According to the typical procedure, the reaction using 3-(4-bromophenyl)-2,2-dimethylpropanoic acid (**1a**, 128.6 mg, 0.50 mmol), PhI(OAc)<sub>2</sub> (321.8 mg, 1.00 mmol), AcOH (0.63 mL), CH<sub>2</sub>Cl<sub>2</sub> (0.63 mL), and I<sub>2</sub> (63.7 mg, 0.25 mmol) was conducted at room temperature for 6 h. Purification by flash column chromatography on silica gel (hexane/ethyl acetate = 95:5) gave the product as a colorless liquid (96.3 mg, 71% yield). <sup>1</sup>H NMR: (400 MHz, CDCl<sub>3</sub>) δ 7.41 (d, *J* = 8.0 Hz, 2H), 7.06 (d, *J* = 8.0 Hz, 2H), 3.00 (s, 2H), 1.97 (s, 3H), 1.43 (s, 6H); <sup>13</sup>C NMR (100 MHz, CDCl<sub>3</sub>) δ 170.5, 136.2, 132.1, 131.0, 120.4, 81.5, 45.7, 25.8, 22.5; IR: (ATR) 2976, 2930, 1732 cm<sup>-1</sup>; HRMS: (FAB) calcd for (C<sub>12</sub>H<sub>14</sub>BrO<sub>2</sub>) 269.0177 ([M-H]<sup>-</sup>), found *m/z* 269.0170

#### 1-(4-Fluorophenyl)-2-methylpropan-2-yl acetate (**2b**)

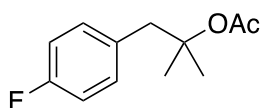

According to the typical procedure, the reaction using 3-(4-fluorophenyl)-2,2-dimethylpropanoic acid (**1b**, 98.3 mg, 0.50 mmol),  $\text{PhI}(\text{OAc})_2$  (320.2 mg, 1.00 mmol),  $\text{AcOH}$  (0.63 mL),  $\text{CH}_2\text{Cl}_2$  (0.63 mL), and  $\text{I}_2$  (63.3 mg, 0.25 mmol) was conducted at room temperature for 6 h. Purification by flash column chromatography on silica gel (hexane/ethyl acetate = 95:5) gave the product as a colorless liquid (74.1 mg, 70% yield).  $^1\text{H}$  NMR: (400 MHz,  $\text{CDCl}_3$ )  $\delta$  7.18–7.11 (m, 2H), 7.02–6.94 (m, 2H), 3.02 (s, 2H), 1.97 (s, 3H), 1.43 (s, 6H);  $^{13}\text{C}$  NMR (100 MHz,  $\text{CDCl}_3$ )  $\delta$  170.6, 161.7 (d,  $J_{\text{CF}} = 242.9$  Hz), 132.9 (d,  $J_{\text{CF}} = 3.3$  Hz), 131.8 (d,  $J_{\text{CF}} = 7.4$  Hz), 114.7 (d,  $J_{\text{CF}} = 21.4$  Hz), 81.8, 45.5, 25.9, 22.5;  $^{19}\text{F}$  NMR (377 MHz,  $\text{CDCl}_3$ )  $\delta$  -119.5; IR: (ATR) 2978, 2936, 1732  $\text{cm}^{-1}$ ; HRMS: (FAB) calcd for ( $\text{C}_{12}\text{H}_{14}\text{FO}_2$ ) 209.0978 ( $[\text{M}-\text{H}]^-$ ), found  $m/z$  209.0975

### 2-Methyl-1-phenylpropan-2-yl acetate (**2c**)

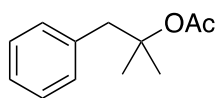

According to the typical procedure, the reaction using 2,2-dimethyl-3-phenylpropanoic acid (**1c**, 89.2 mg, 0.50 mmol),  $\text{PhI}(\text{OAc})_2$  (483.8 mg, 1.50 mmol),  $\text{AcOH}$  (1.25 mL),  $\text{CH}_2\text{Cl}_2$  (1.25 mL), and  $\text{I}_2$  (64.1 mg, 0.25 mmol) was conducted at room temperature for 6 h. Purification by flash column chromatography on silica gel (hexane/ethyl acetate = 95:5) gave the product as a colorless liquid (63.2 mg, 65% yield).  $^1\text{H}$  NMR: (400 MHz,  $\text{CDCl}_3$ )  $\delta$  7.33–7.12 (m, 5H), 3.05 (s, 2H), 1.97 (s, 3H), 1.44 (s, 6H);  $^{13}\text{C}$  NMR (100 MHz,  $\text{CDCl}_3$ )  $\delta$  170.6, 137.2, 130.5, 127.9, 126.4, 82.0, 46.3, 25.9, 22.5

The analytical data for this compound were in excellent agreement with the reported data.<sup>[2]</sup>

### 2-Methyl-1-(4-tolyl)propan-2-yl acetate (**2d**)

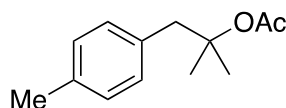

According to the typical procedure, the reaction using 2,2-dimethyl-3-(4-tolyl)propanoic acid (**1d**, 95.7 mg, 0.50 mmol),  $\text{PhI}(\text{OAc})_2$  (322.2 mg, 1.00 mmol),  $\text{AcOH}$  (0.63 mL),  $\text{CH}_2\text{Cl}_2$  (0.63 mL), and  $\text{I}_2$  (63.4 mg, 0.25 mmol) was conducted at room temperature for 6 h. Purification by flash column chromatography on silica gel (hexane/ethyl acetate = 95:5) gave the product as a colorless liquid (68.2 mg, 66% yield).  $^1\text{H}$  NMR: (400 MHz,  $\text{CDCl}_3$ )  $\delta$  7.14–7.04 (m, 4H), 3.01 (s, 2H), 2.33 (s, 3H), 1.97 (s, 3H), 1.43 (s, 6H);  $^{13}\text{C}$  NMR (100 MHz,  $\text{CDCl}_3$ )  $\delta$  170.7, 135.9, 134.2, 130.4, 128.7, 82.1, 45.9, 25.9, 22.6, 21.0; IR: (ATR) 2978, 2924, 1732  $\text{cm}^{-1}$ ; HRMS: (FAB) calcd for ( $\text{C}_{13}\text{H}_{17}\text{O}_2$ ) 205.1229 ( $[\text{M}-\text{H}]^-$ ), found  $m/z$  205.1232

### 1-(4-Carboxyphenyl)-2-methylpropan-2-yl acetate (2e)

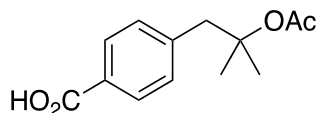

According to the typical procedure, the reaction using 3-(4-carboxyphenyl)-2,2-dimethylpropanoic acid (**1e**, 111.4 mg, 0.50 mmol),  $\text{PhI}(\text{OAc})_2$  (483.1 mg, 1.50 mmol),  $\text{AcOH}$  (1.25 mL),  $\text{CH}_2\text{Cl}_2$  (1.25 mL), and  $\text{I}_2$  (127.3 mg, 0.50 mmol) was conducted at room temperature for 6 h. Purification by flash column chromatography on silica gel (hexane/ethyl acetate = 90:10) gave the product as a white solid (88.8 mg, 75% yield). mp: 159.8–161.1 °C;  $^1\text{H}$  NMR: (400 MHz,  $\text{CDCl}_3$ )  $\delta$  8.05 (d,  $J$  = 8.0 Hz, 2H), 7.30 (d,  $J$  = 8.0 Hz, 2H), 3.14 (s, 2H), 1.99 (s, 3H), 1.47 (s, 6H);  $^{13}\text{C}$  NMR (100 MHz,  $\text{CDCl}_3$ )  $\delta$  171.6, 170.7, 143.8, 130.7, 129.9, 127.5, 81.7, 46.4, 26.1, 22.5; IR: (ATR) 2976, 2553, 1730, 1672  $\text{cm}^{-1}$ ; HRMS: (FAB) calcd for  $(\text{C}_{13}\text{H}_{15}\text{O}_4)$  235.0970 ( $[\text{M}-\text{H}]^-$ ), found  $m/z$  235.0972

### 1-(2-Bromophenyl)-2-methylpropan-2-yl acetate (2f)

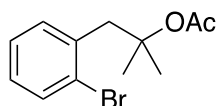

According to the typical procedure, the reaction using 3-(2-bromophenyl)-2,2-dimethylpropanoic acid (**1f**, 128.4 mg, 0.50 mmol),  $\text{PhI}(\text{OAc})_2$  (484.1 mg, 1.50 mmol),  $\text{AcOH}$  (1.25 mL),  $\text{CH}_2\text{Cl}_2$  (1.25 mL), and  $\text{I}_2$  (95.7 mg, 0.38 mmol) was conducted at room temperature for 6 h. Purification by flash column chromatography on silica gel (hexane/ethyl acetate = 95:5) gave the product as a colorless liquid (90.7 mg, 67% yield).  $^1\text{H}$  NMR: (400 MHz,  $\text{CDCl}_3$ )  $\delta$  7.56 (dd,  $J$  = 8.0, 1.6 Hz, 1H), 7.33–7.21 (m, 2H), 7.09 (ddd,  $J$  = 8.0, 8.0, 2.0 Hz, 1H), 3.27 (s, 2H), 2.01 (s, 3H), 1.51 (s, 6H);  $^{13}\text{C}$  NMR (100 MHz,  $\text{CDCl}_3$ )  $\delta$  170.5, 137.1, 133.0, 132.3, 128.1, 126.9, 126.1, 82.7, 45.2, 25.8, 22.6; IR: (ATR) 3062, 2980, 2935, 1732  $\text{cm}^{-1}$ ; HRMS: (FAB) calcd for  $(\text{C}_{12}\text{H}_{14}\text{BrO}_2)$  269.0177 ( $[\text{M}-\text{H}]^-$ ), found  $m/z$  269.0172

### 2-Methyl-1-(3-nitrophenyl)propan-2-yl acetate (2g)

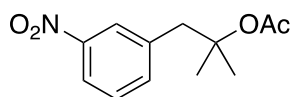

According to the typical procedure, the reaction using 2,2-dimethyl-3-(3-nitrophenyl)propanoic acid (**1g**, 111.2 mg, 0.50 mmol),  $\text{PhI}(\text{OAc})_2$  (320.2 mg, 0.99 mmol),  $\text{AcOH}$  (0.63 mL),  $\text{CH}_2\text{Cl}_2$  (0.63 mL), and  $\text{I}_2$  (63.6 mg, 0.25 mmol) was conducted at room temperature for 6 h. Purification by flash column chromatography on silica gel (hexane/ethyl acetate = 90:10) gave the product as a pale yellow solid (80.4 mg, 68% yield). mp: 76.9–78.1 °C;  $^1\text{H}$  NMR: (400 MHz,  $\text{CDCl}_3$ )  $\delta$  8.16–8.07 (m, 2H), 7.57–7.45 (m, 2H), 3.15 (s, 2H), 2.00 (s, 3H), 1.47 (s, 6H);  $^{13}\text{C}$  NMR (100 MHz,  $\text{CDCl}_3$ )  $\delta$  170.6, 148.0, 139.2, 136.7, 128.8, 125.2, 121.7, 81.2, 46.0, 25.9, 22.4; IR: (ATR) 2974, 2928, 1719  $\text{cm}^{-1}$ ; HRMS: (FAB) calcd for  $(\text{C}_{12}\text{H}_{15}\text{NO}_4)$  237.1001 ( $\text{M}^+$ ), found  $m/z$  237.1006

#### 4-Methoxycarbonyl-2-methylbutan-2-yl acetate (2h)

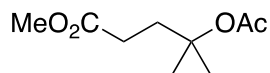

According to the typical procedure, the reaction using 2,2-dimethyl-4-methoxycarbonylbutanoic acid (**1h**, 82.8 mg, 0.48 mmol),  $\text{PhI}(\text{OAc})_2$  (484.7 mg, 1.50 mmol), AcOH (1.25 mL),  $\text{CH}_2\text{Cl}_2$  (1.25 mL), and  $\text{I}_2$  (63.3 mg, 0.25 mmol) was conducted at room temperature for 6 h. Purification by flash column chromatography on silica gel (hexane/ethyl acetate = 90:10) gave the product as a colorless liquid (37.6 mg, 42% yield).  $^1\text{H}$  NMR: (400 MHz,  $\text{CDCl}_3$ )  $\delta$  3.68 (s, 3H), 2.43–2.35 (m, 2H), 2.11–2.03 (m, 2H), 1.97 (s, 3H), 1.46 (s, 6H);  $^{13}\text{C}$  NMR (100 MHz,  $\text{CDCl}_3$ )  $\delta$  173.9, 170.3, 81.1, 51.7, 36.1, 29.0, 25.6, 22.3; IR: (ATR) 2980, 2953, 1732  $\text{cm}^{-1}$ ; HRMS: (FAB) calcd for  $(\text{C}_9\text{H}_{15}\text{O}_4)$  187.0970 ( $[\text{M}-\text{H}]^-$ ), found  $m/z$  187.0966

#### 2-Methyl-4-phenylbutan-2-yl acetate (2i)

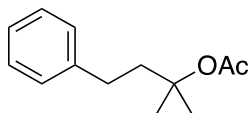

According to the typical procedure, the reaction using 2,2-dimethyl-4-phenylbutanoic acid (**1i**, 96.3 mg, 0.50 mmol),  $\text{PhI}(\text{OAc})_2$  (322.0 mg, 1.00 mmol), AcOH (0.63 mL),  $\text{CH}_2\text{Cl}_2$  (0.63 mL), and  $\text{I}_2$  (63.2 mg, 0.25 mmol) was conducted at room temperature for 6 h. Purification by flash column chromatography on silica gel (hexane/ethyl acetate = 95:5) gave the product as a colorless liquid (79.7 mg, 77% yield).  $^1\text{H}$  NMR: (400 MHz,  $\text{CDCl}_3$ )  $\delta$  7.32–7.22 (m, 2H), 7.22–7.13 (m, 3H), 2.67–2.59 (m, 2H), 2.10–2.01 (m, 2H), 1.97 (s, 3H), 1.49 (s, 6H);  $^{13}\text{C}$  NMR (100 MHz,  $\text{CDCl}_3$ )  $\delta$  170.4, 142.0, 128.3, 125.7, 81.8, 42.6, 30.3, 26.0, 22.3

The analytical data for this compound were in excellent agreement with the reported data.<sup>[3]</sup>

#### 1-Phenethylcyclohexyl acetate (2j)

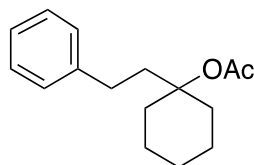

According to the typical procedure, the reaction using 1-phenethylcyclohexanecarboxylic acid (**1j**, 117.9 mg, 0.51 mmol),  $\text{PhI}(\text{OAc})_2$  (488.5 mg, 1.52 mmol), AcOH (1.25 mL),  $\text{CH}_2\text{Cl}_2$  (1.25 mL), and  $\text{I}_2$  (63.4 mg, 0.25 mmol) was conducted at room temperature for 6 h. Purification by flash column chromatography on silica gel (hexane/ethyl acetate = 95:5) gave the product as a colorless liquid (40.5 mg, 33% yield).  $^1\text{H}$  NMR: (400 MHz,  $\text{CDCl}_3$ )  $\delta$  7.31–7.22 (m, 2H), 7.22–7.10 (m, 3H), 2.63–2.54 (m, 2H), 2.30–2.17 (m, 4H), 2.02 (s, 3H), 1.70–1.49 (m, 4H), 1.49–1.35 (m, 2H), 1.35–1.20 (m, 2H);  $^{13}\text{C}$  NMR (100 MHz,  $\text{CDCl}_3$ )  $\delta$  170.4, 142.2, 128.4, 128.3, 125.7, 83.7, 39.4, 34.6, 29.6, 25.6, 22.2, 21.9; IR: (ATR) 2932, 2860, 1730  $\text{cm}^{-1}$ ; HRMS: (FAB) calcd for  $(\text{C}_{16}\text{H}_{21}\text{O}_2)$  245.1452 ( $[\text{M}-\text{H}]^-$ ), found  $m/z$  245.1539

### Adamantan-1-yl acetate (2k)

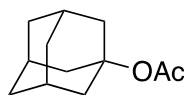

According to the typical procedure, the reaction using 1-adamantanecarboxylic acid (**1k**, 90.6 mg, 0.50 mmol),  $\text{PhI}(\text{OAc})_2$  (322.2 mg, 1.00 mmol), AcOH (0.63 mL),  $\text{CH}_2\text{Cl}_2$  (0.63 mL) and  $\text{I}_2$  (63.8 mg, 0.25 mmol) was conducted at room temperature for 6 h. Purification by flash column chromatography on silica gel (hexane/ethyl acetate = 95:5) gave the product as a white solid (78.9 mg, 81% yield).  $^1\text{H}$  NMR: (400 MHz,  $\text{CDCl}_3$ )  $\delta$  2.20–2.13 (m, 3H), 2.13–2.10 (m, 6H), 1.97 (s, 3H), 1.72–1.58 (m, 6H);  $^{13}\text{C}$  NMR (100 MHz,  $\text{CDCl}_3$ )  $\delta$  170.3, 80.2, 41.3, 36.2, 30.7, 22.7

The analytical data for this compound were in excellent agreement with the reported data.<sup>[4]</sup>

### 1-Phenylethyl acetate (2l)

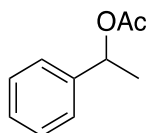

According to the typical procedure, the reaction using 2-phenylpropanoic acid (**1l**, 77.0 mg, 0.51 mmol),  $\text{PhI}(\text{OAc})_2$  (321.5 mg, 1.00 mmol), AcOH (1.25 mL),  $\text{CH}_2\text{Cl}_2$  (1.25 mL), and  $\text{I}_2$  (63.7 mg, 0.25 mmol) was conducted at room temperature for 6 h. Purification by flash column chromatography on silica gel (hexane/ethyl acetate = 95:5) gave the product as a colorless liquid (85.2 mg, 93% yield).  $^1\text{H}$  NMR: (400 MHz,  $\text{CDCl}_3$ )  $\delta$  7.41–7.23 (m, 5H), 5.88 (q,  $J$  = 6.8 Hz, 1H), 2.06 (s, 3H), 1.53 (d,  $J$  = 6.8 Hz, 3H);  $^{13}\text{C}$  NMR (100 MHz,  $\text{CDCl}_3$ )  $\delta$  170.3, 141.6, 128.5, 127.8, 126.1, 72.3, 22.2, 21.3

The analytical data for this compound were in excellent agreement with the reported data.<sup>[5]</sup>

### 1-(4-Isobutylphenyl)ethyl acetate (2m)

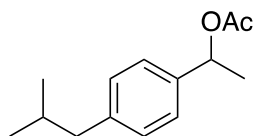

According to the typical procedure, the reaction using 2-(4-isobutylphenyl)propionic acid (**1m**, 103.0 mg, 0.50 mmol),  $\text{PhI}(\text{OAc})_2$  (322.1 mg, 1.00 mmol), AcOH (1.25 mL),  $\text{CH}_2\text{Cl}_2$  (1.25 mL), and  $\text{I}_2$  (63.7 mg, 0.25 mmol) was conducted at room temperature for 6 h. Purification by flash column chromatography on silica gel (hexane/ethyl acetate = 95:5) gave the product as a colorless liquid (102.6 mg, 93% yield).  $^1\text{H}$  NMR: (400 MHz,  $\text{CDCl}_3$ )  $\delta$  7.26 (d,  $J$  = 8.0 Hz, 2H), 7.12 (d,  $J$  = 8.0 Hz, 2H), 5.87 (q,  $J$  = 6.4 Hz, 1H), 2.46 (d,  $J$  = 7.2 Hz, 2H), 2.06 (s, 3H), 1.92–1.78 (m, 1H), 1.53 (d,  $J$  = 6.4 Hz, 2H), 0.90 (d,  $J$  = 6.4 Hz, 6H);  $^{13}\text{C}$  NMR (100 MHz,  $\text{CDCl}_3$ )  $\delta$  170.3, 141.4, 138.8, 129.1, 125.9, 72.2, 45.1, 30.1, 22.3, 22.0, 21.4; IR: (ATR) 2955, 2930, 2868, 1736, 1238  $\text{cm}^{-1}$ ; HRMS: (FAB) calcd for  $(\text{C}_{14}\text{H}_{20}\text{O}_2)$  220.1463 ( $\text{M}^+$ ), found  $m/z$  220.1464



### 1-[4-((2-Oxocyclopentyl)methyl)phenyl]ethyl acetate (**2n**)

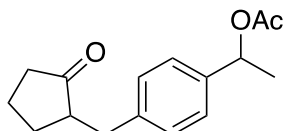

According to the typical procedure, the reaction using loxoprofen (**1n**, 125.1 mg, 0.50 mmol),  $\text{PhI}(\text{OAc})_2$  (323.0 mg, 1.00 mmol), AcOH (1.25 mL),  $\text{CH}_2\text{Cl}_2$  (1.25 mL), and  $\text{I}_2$  (64.0 mg, 0.25 mmol) was conducted at room temperature for 6 h. Purification by flash column chromatography on silica gel (hexane/ethyl acetate = 90:10) gave the product as a colorless liquid (124.2 mg, 94% yield).  $^1\text{H}$  NMR: (400 MHz,  $\text{CDCl}_3$ )  $\delta$  7.27 (d,  $J$  = 8.0 Hz, 2H), 7.15 (d,  $J$  = 8.0 Hz, 2H), 5.86 (q,  $J$  = 6.4 Hz, 1H), 3.14 (dd,  $J$  = 14.0, 4.0 Hz, 1H), 2.52 (dd,  $J$  = 14.0, 9.6 Hz, 1H), 2.41–2.29 (m, 2H), 2.19–2.05 (m, 2H), 2.07 (s, 3H), 2.01–1.92 (m, 1H), 1.81–1.64 (m, 1H), 1.61–1.49 (m, 1H), 1.52 (d,  $J$  = 6.4 Hz, 3H);  $^{13}\text{C}$  NMR (100 MHz,  $\text{CDCl}_3$ )  $\delta$  220.1, 170.3, 139.7, 139.5, 129.0, 126.2, 72.1, 51.0, 38.1, 35.2, 29.2, 22.1, 21.4, 20.5; IR: (ATR) 2963, 2934, 2874, 1732  $\text{cm}^{-1}$ ; HRMS: (FAB) calcd for ( $\text{C}_{16}\text{H}_{19}\text{O}_3$ ) 259.1334 ( $[\text{M}-\text{H}]^-$ ), found  $m/z$  259.1328

## 6. Hydrolysis of acetates

### 2-Methyl-1-phenylpropan-2-ol (**3c**)

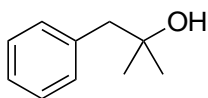

A two-necked reaction flask containing a magnetic stirring bar was charged with 1,1-dimethyl-2-phenylethyl acetate (**2c**, 95.0 mg, 0.49 mmol), NaOH (62.7 mg, 1.57 mmol), and MeOH (3 mL). The reaction mixture was stirred at room temperature for 24 h. The reaction was neutralized with HCl aq. (2 M), and the mixture was extracted with EtOAc ( $3 \times 20$  mL). The collected organic layers were dried over  $\text{Na}_2\text{SO}_4$ . The solution was concentrated under reduced pressure to give the crude product, which was analyzed by  $^1\text{H}$  NMR spectroscopy using 1,1,2,2-tetrachloroethane as an internal standard. Purification by flash column chromatography on silica gel (hexane/ethyl acetate = 85:15) gave the product as a colorless liquid (70.5 mg, 95% yield).  $^1\text{H}$  NMR: (400 MHz,  $\text{CDCl}_3$ )  $\delta$  7.46–7.17 (m, 5H), 2.77 (s, 2H), 1.23 (s, 6H);  $^{13}\text{C}$  NMR (100 MHz,  $\text{CDCl}_3$ )  $\delta$  137.7, 130.4, 128.2, 126.5, 70.7, 49.7, 29.1

The analytical data for this compound were in excellent agreement with the reported data.<sup>[6]</sup>

### 1-(4-Isobutylphenyl)ethan-1-ol (**3m**)

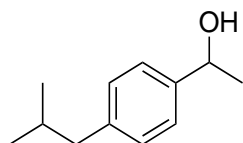

Two-necked reaction flask containing a magnetic stirring bar was charged with 1-(4-isobutylphenyl)ethyl acetate (**2m**, 116.3 mg, 0.53 mmol), NaOH (60.3 mg, 1.50 mmol), and MeOH (3 mL). The reaction mixture was stirred at room temperature for 24 h. The reaction was neutralized with HCl aq. (2 M), and the mixture was extracted with EtOAc (3 × 20 mL). The collected organic layers were dried over Na<sub>2</sub>SO<sub>4</sub>. The solution was concentrated under reduced pressure to give the crude product, which was analyzed by <sup>1</sup>H NMR spectroscopy using 1,1,2,2-tetrachloroethane as an internal standard. Purification by flash column chromatography on silica gel (hexane/ethyl acetate = 85:15) gave the product as a colorless liquid (89.4 mg, 95% yield). <sup>1</sup>H NMR: (400 MHz, CDCl<sub>3</sub>) δ 7.28 (d, *J* = 8.0 Hz, 2H), 7.13 (d, *J* = 8.0 Hz, 2H), 4.91–4.85 (m, 1H), 2.46 (d, *J* = 6.8 Hz, 2H), 1.90–1.80 (m, 1H), 1.77 (brs, 1H), 1.49 (d, *J* = 6.4 Hz, 3H), 0.90 (d, *J* = 6.8 Hz, 6H); <sup>13</sup>C NMR (100 MHz, CDCl<sub>3</sub>) δ 143.0, 141.0, 129.2, 125.2, 70.3, 45.1, 30.2, 25.0, 22.4

The analytical data for this compound were in excellent agreement with the reported data.<sup>[7]</sup>

## 7. References

- (1) Kiyokawa, K.; Watanabe, T.; Fra, L.; Kojima, T.; Minakata, S. *J. Org. Chem.* **2017**, *82*, 11711.
- (2) Chakraborti, A. K.; Shivani *J. Org. Chem.* **2006**, *71*, 5785.
- (3) Nishimoto, Y.; Okita, A.; Yasuda, M.; Baba, A. *Org. Lett.* **2012**, *14*, 1846.
- (4) Liu, Z.; Ma, Q.; Liu, Y.; Wang, Q. *Org. Lett.* **2014**, *16*, 236.
- (5) Yu, W.; Zhou, M.; Wang, T.; He, Z.; Shi, B.; Xu, Y.; Huang, K. *Org. Lett.* **2017**, *19*, 5776.
- (6) Liu, Z.; Zhang, Y.; Cai, Z.; Sun, H.; Cheng, X. *Adv. Synth. Catal.* **2015**, *357*, 589.
- (7) Song, H.-T.; Ding, W.; Zhou, Q.-Q.; Liu, J.; Lu, L.-Q.; Xiao, W.-J. *J. Org. Chem.* **2016**, *81*, 7250.

## 8. NMR spectra

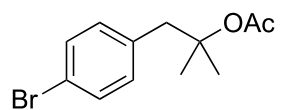

$^1\text{H}$  NMR: (400 MHz,  $\text{CDCl}_3$ )

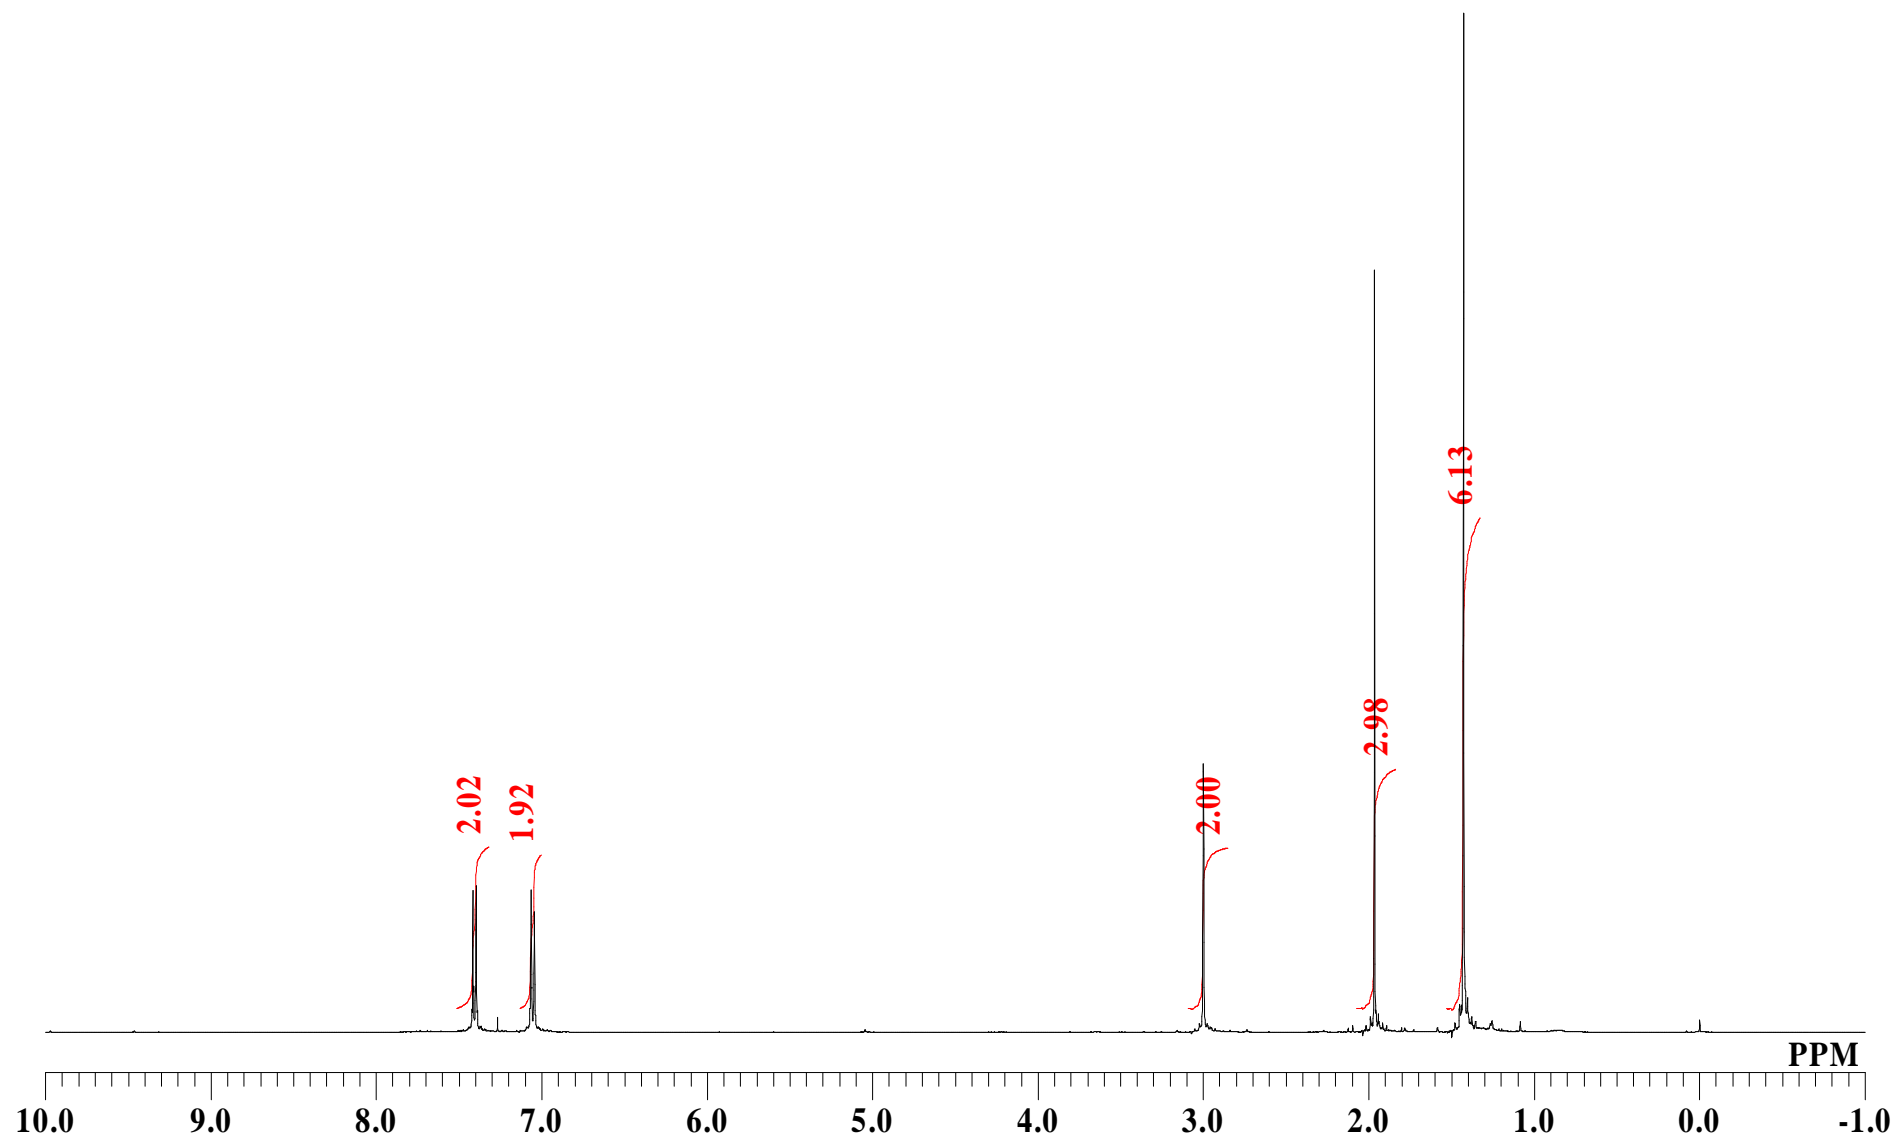

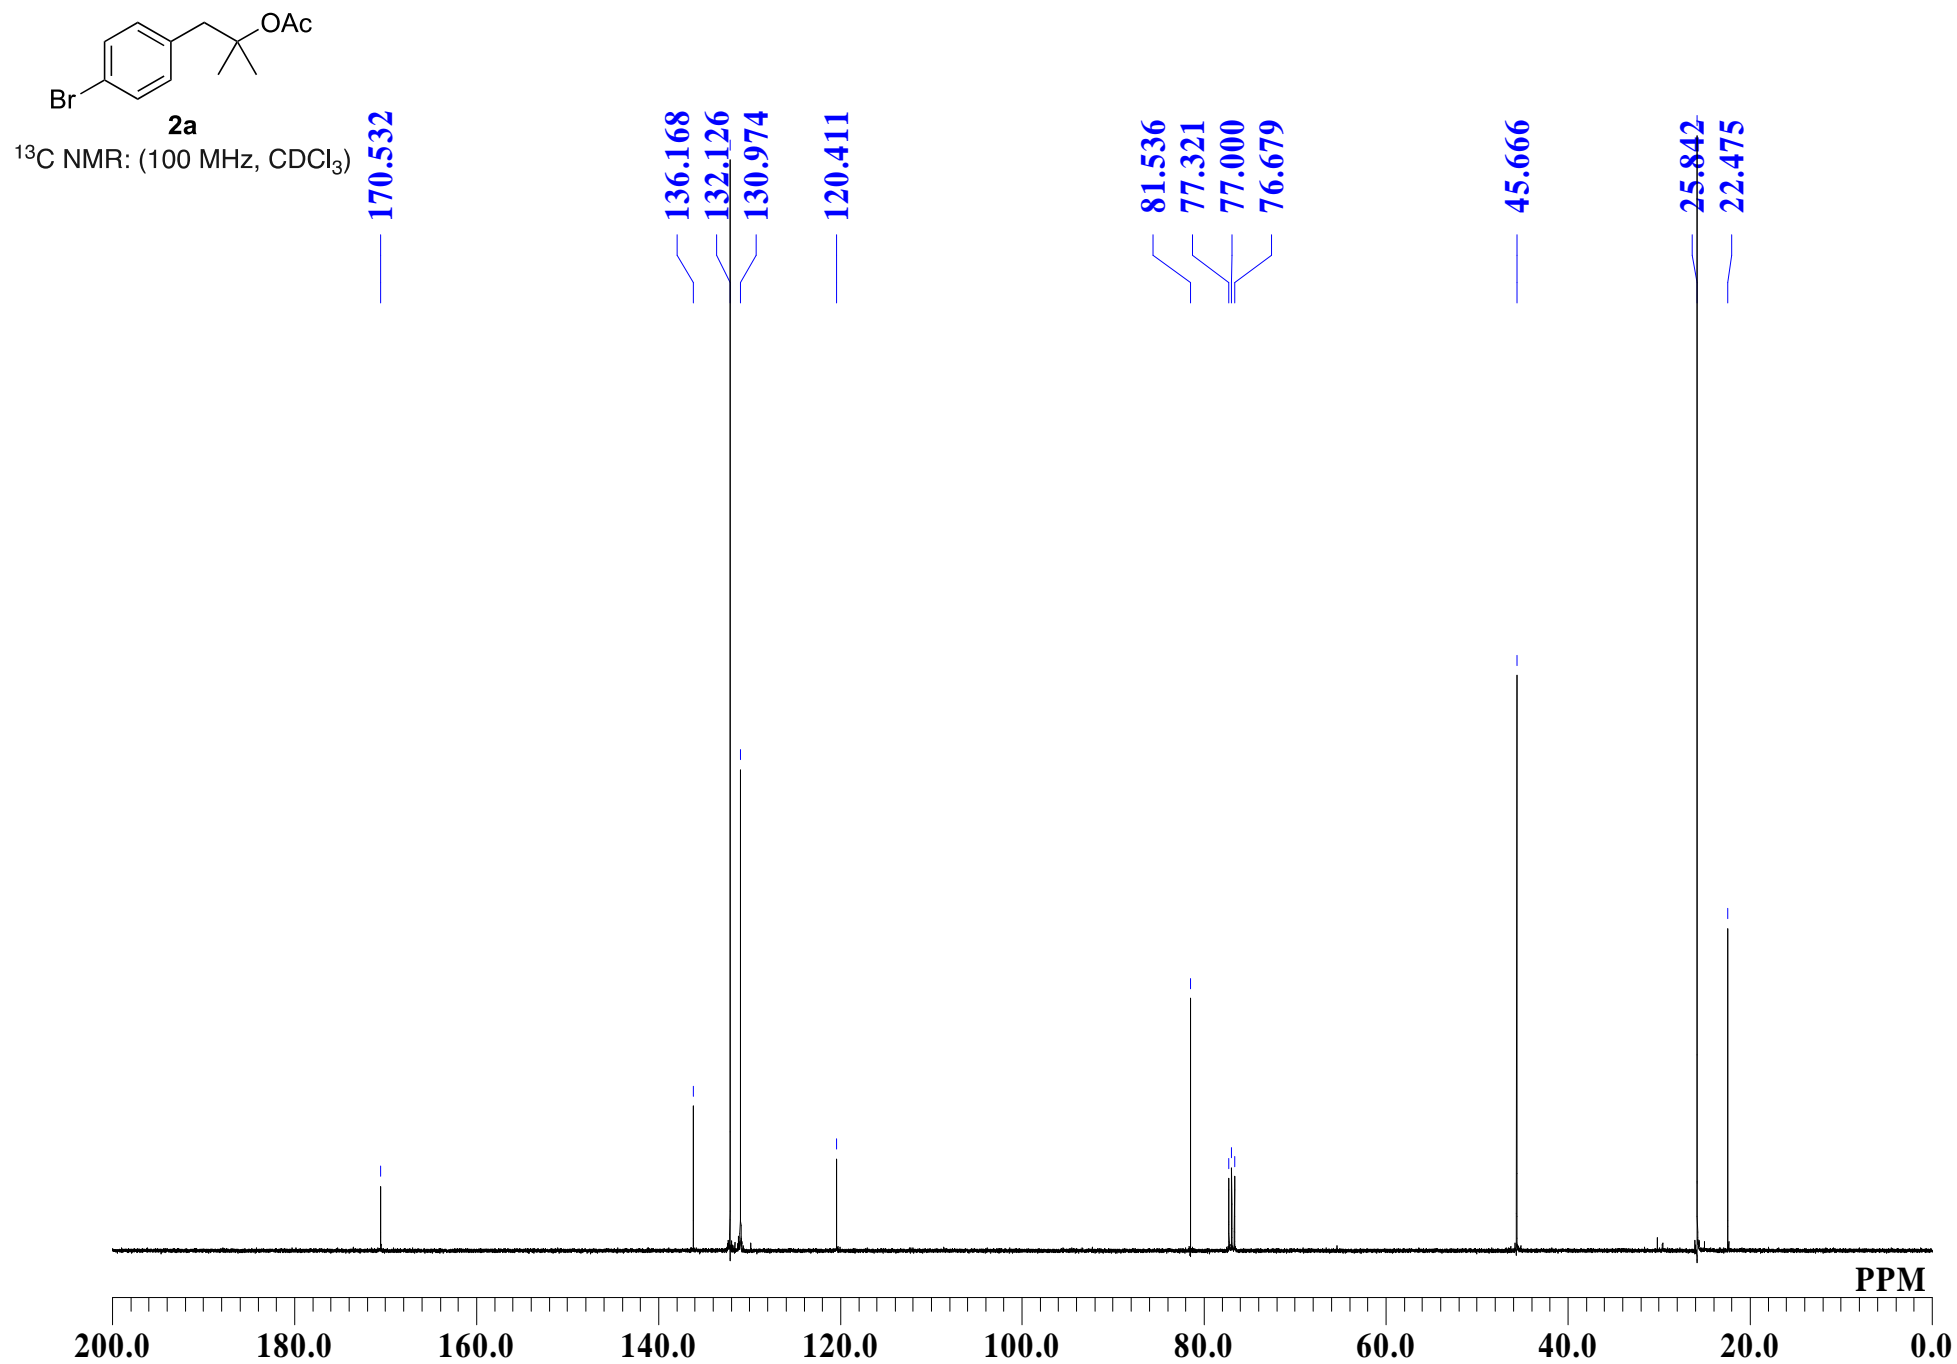

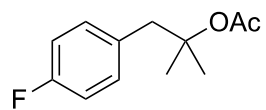

**2b**

$^1\text{H}$  NMR: (400 MHz,  $\text{CDCl}_3$ )

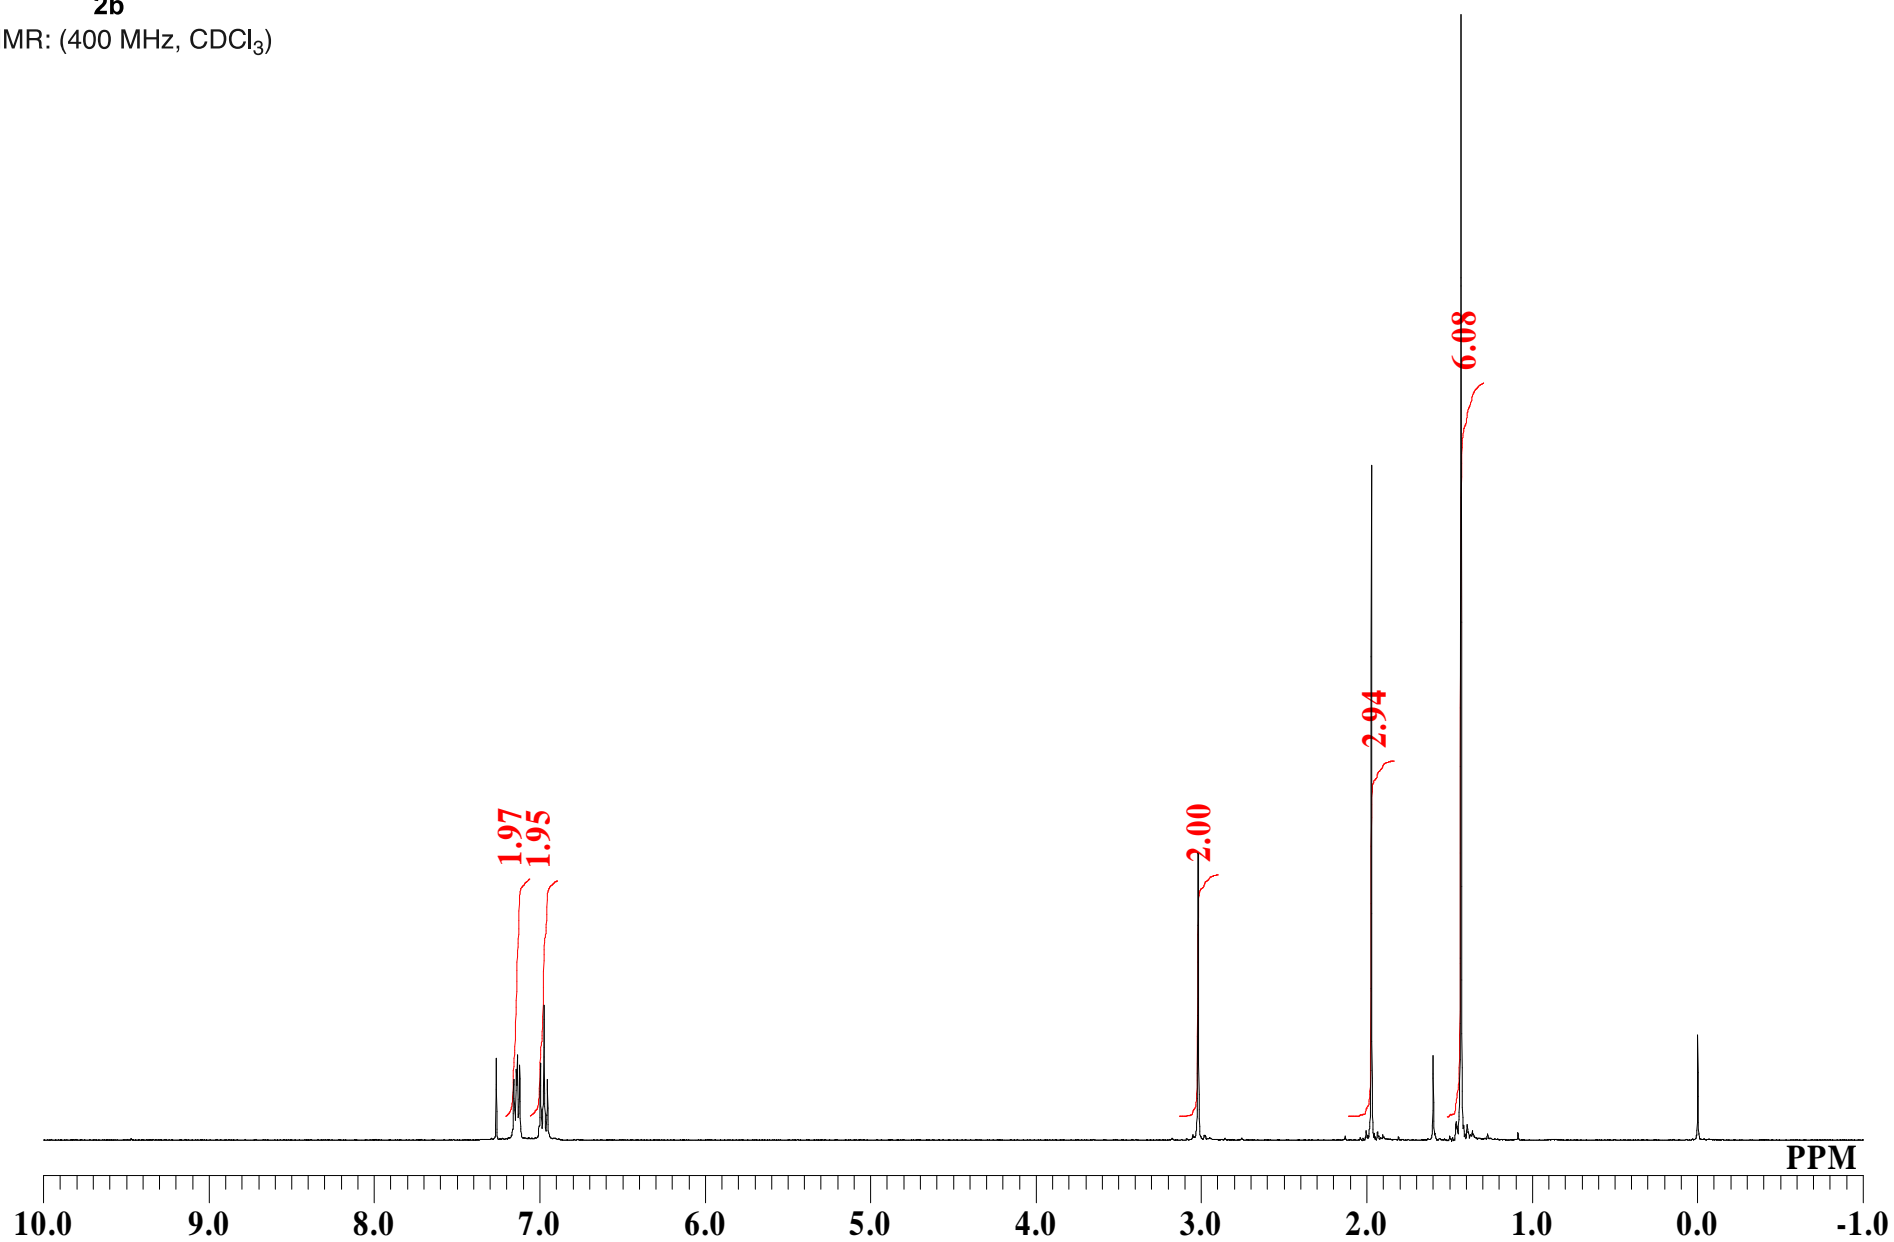

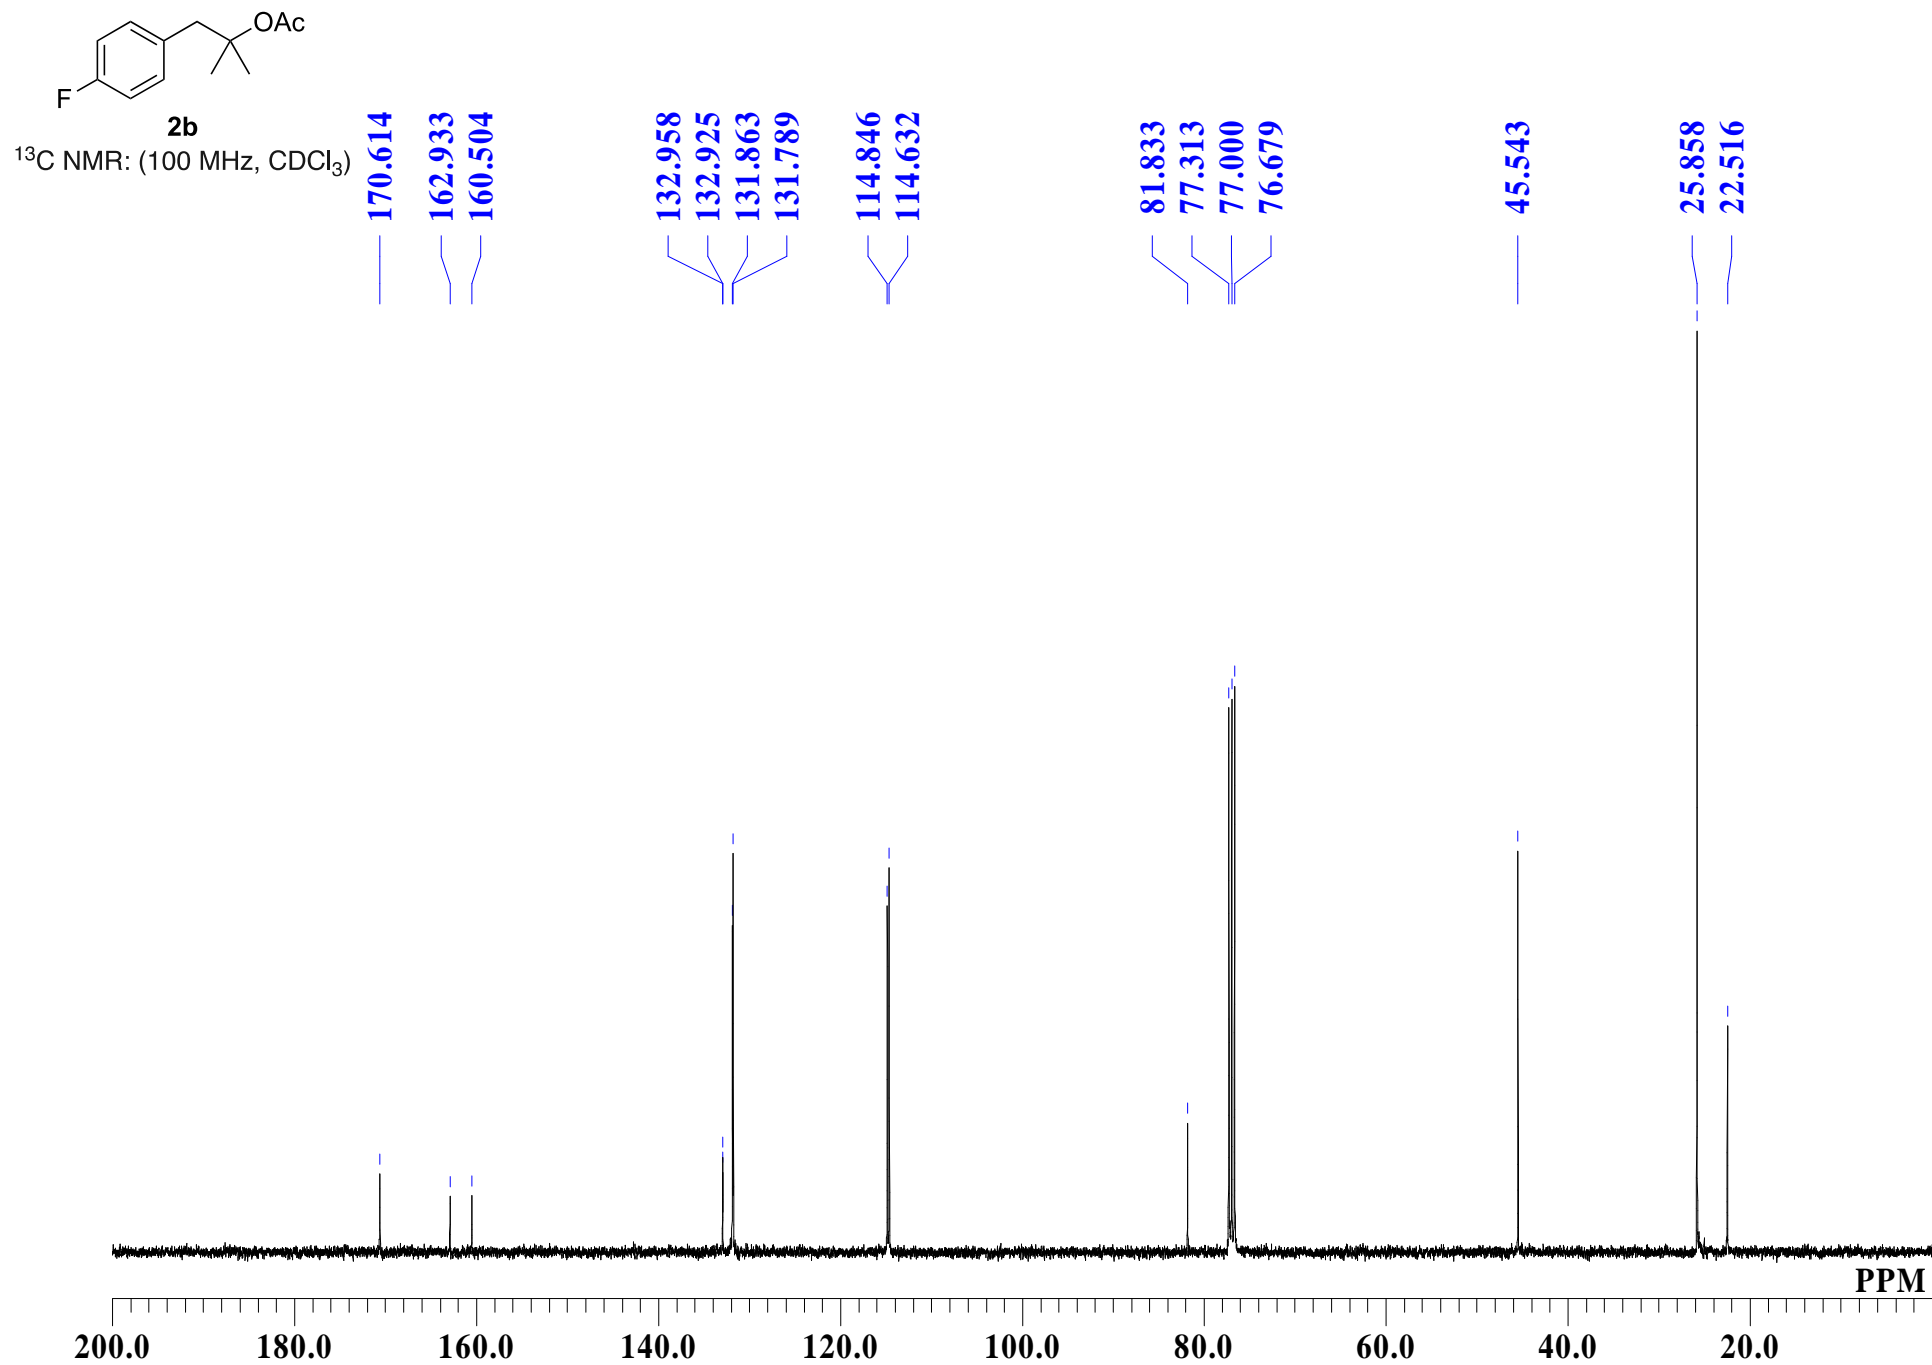

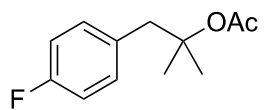

**2b**

$^{19}\text{F}$  NMR: (377 MHz,  $\text{CDCl}_3$ )

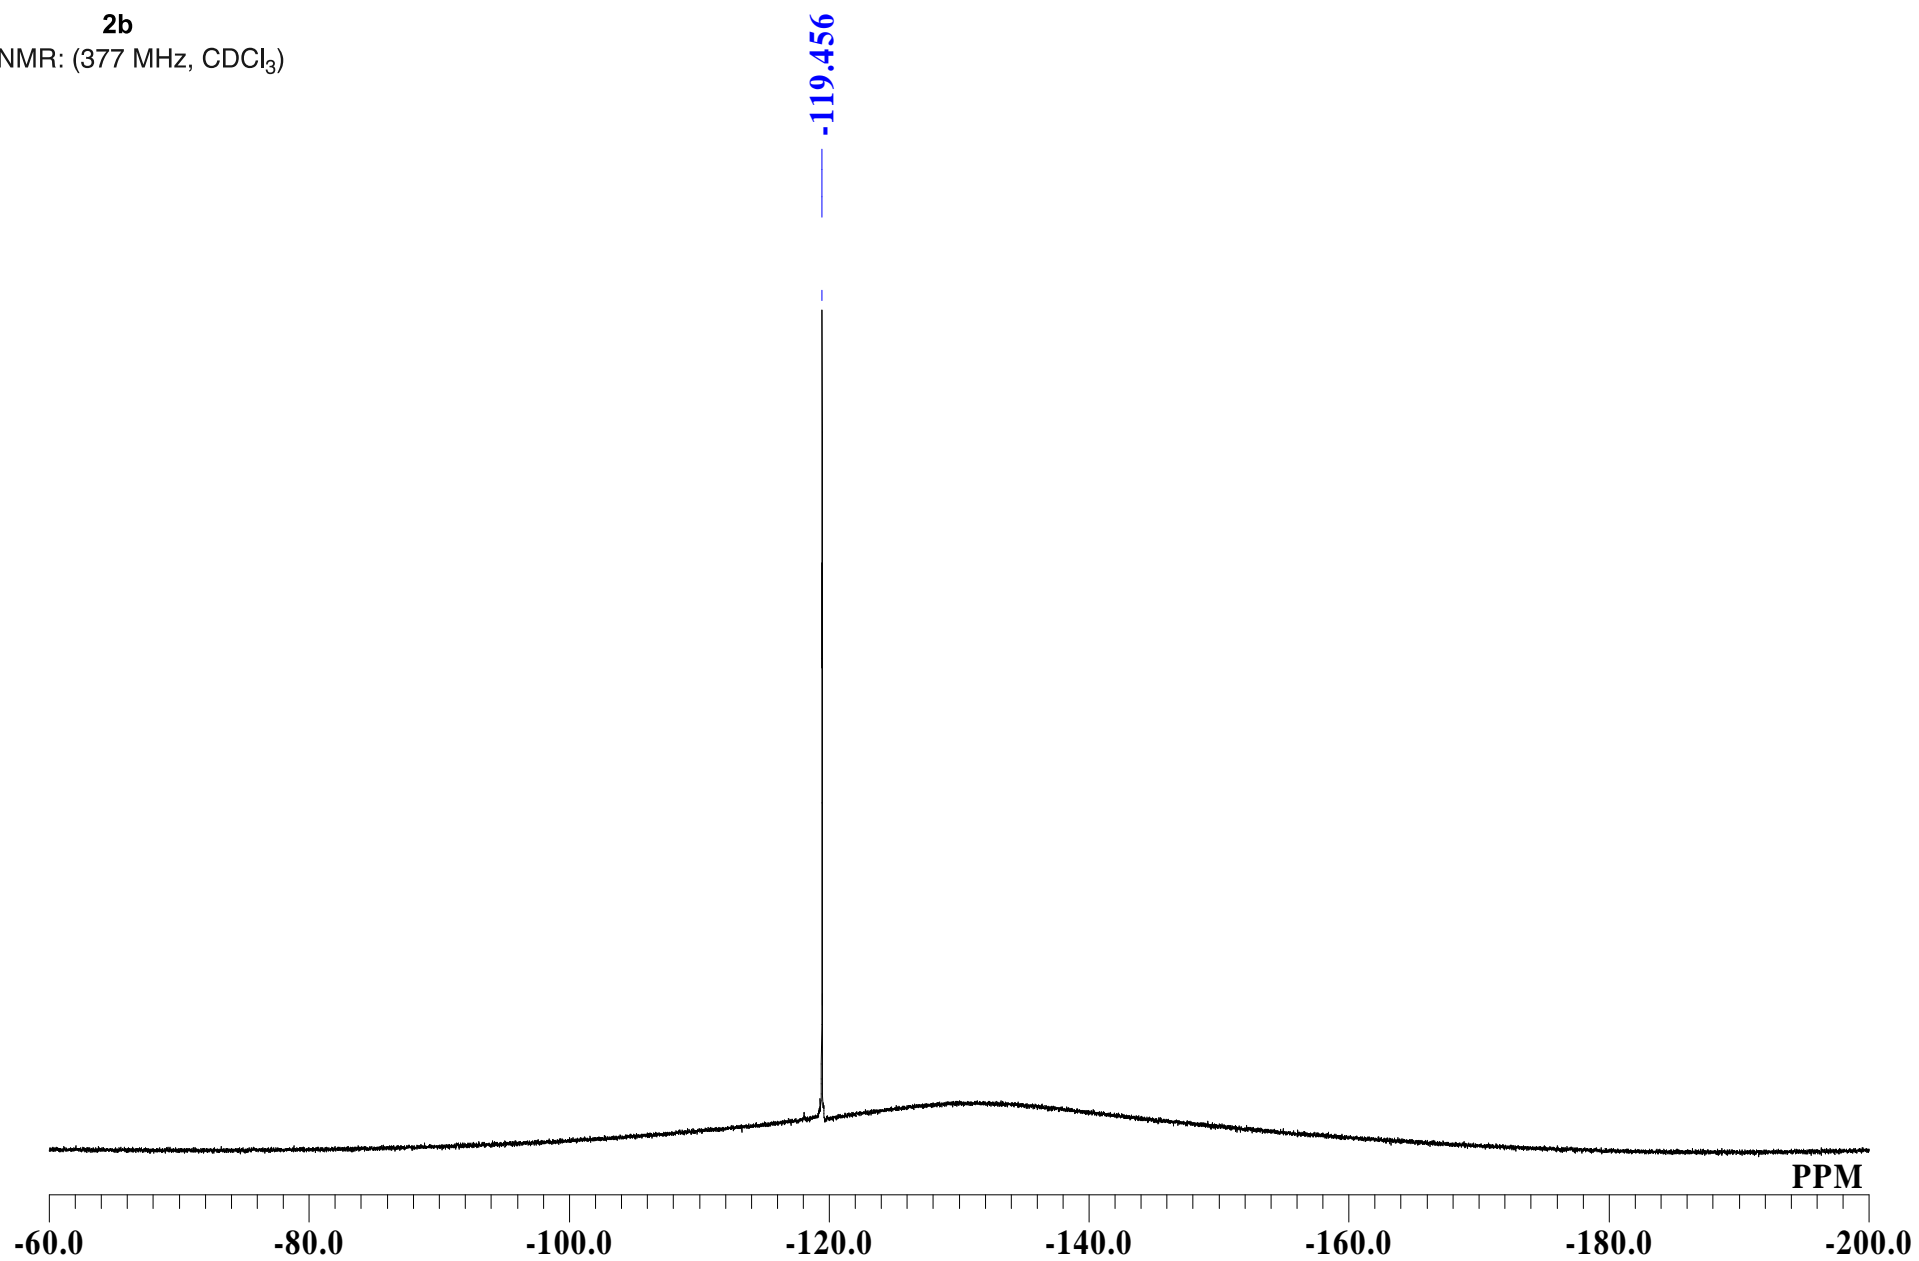

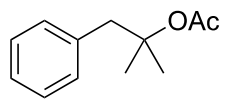

**2c**

$^1\text{H}$  NMR: (400 MHz,  $\text{CDCl}_3$ )

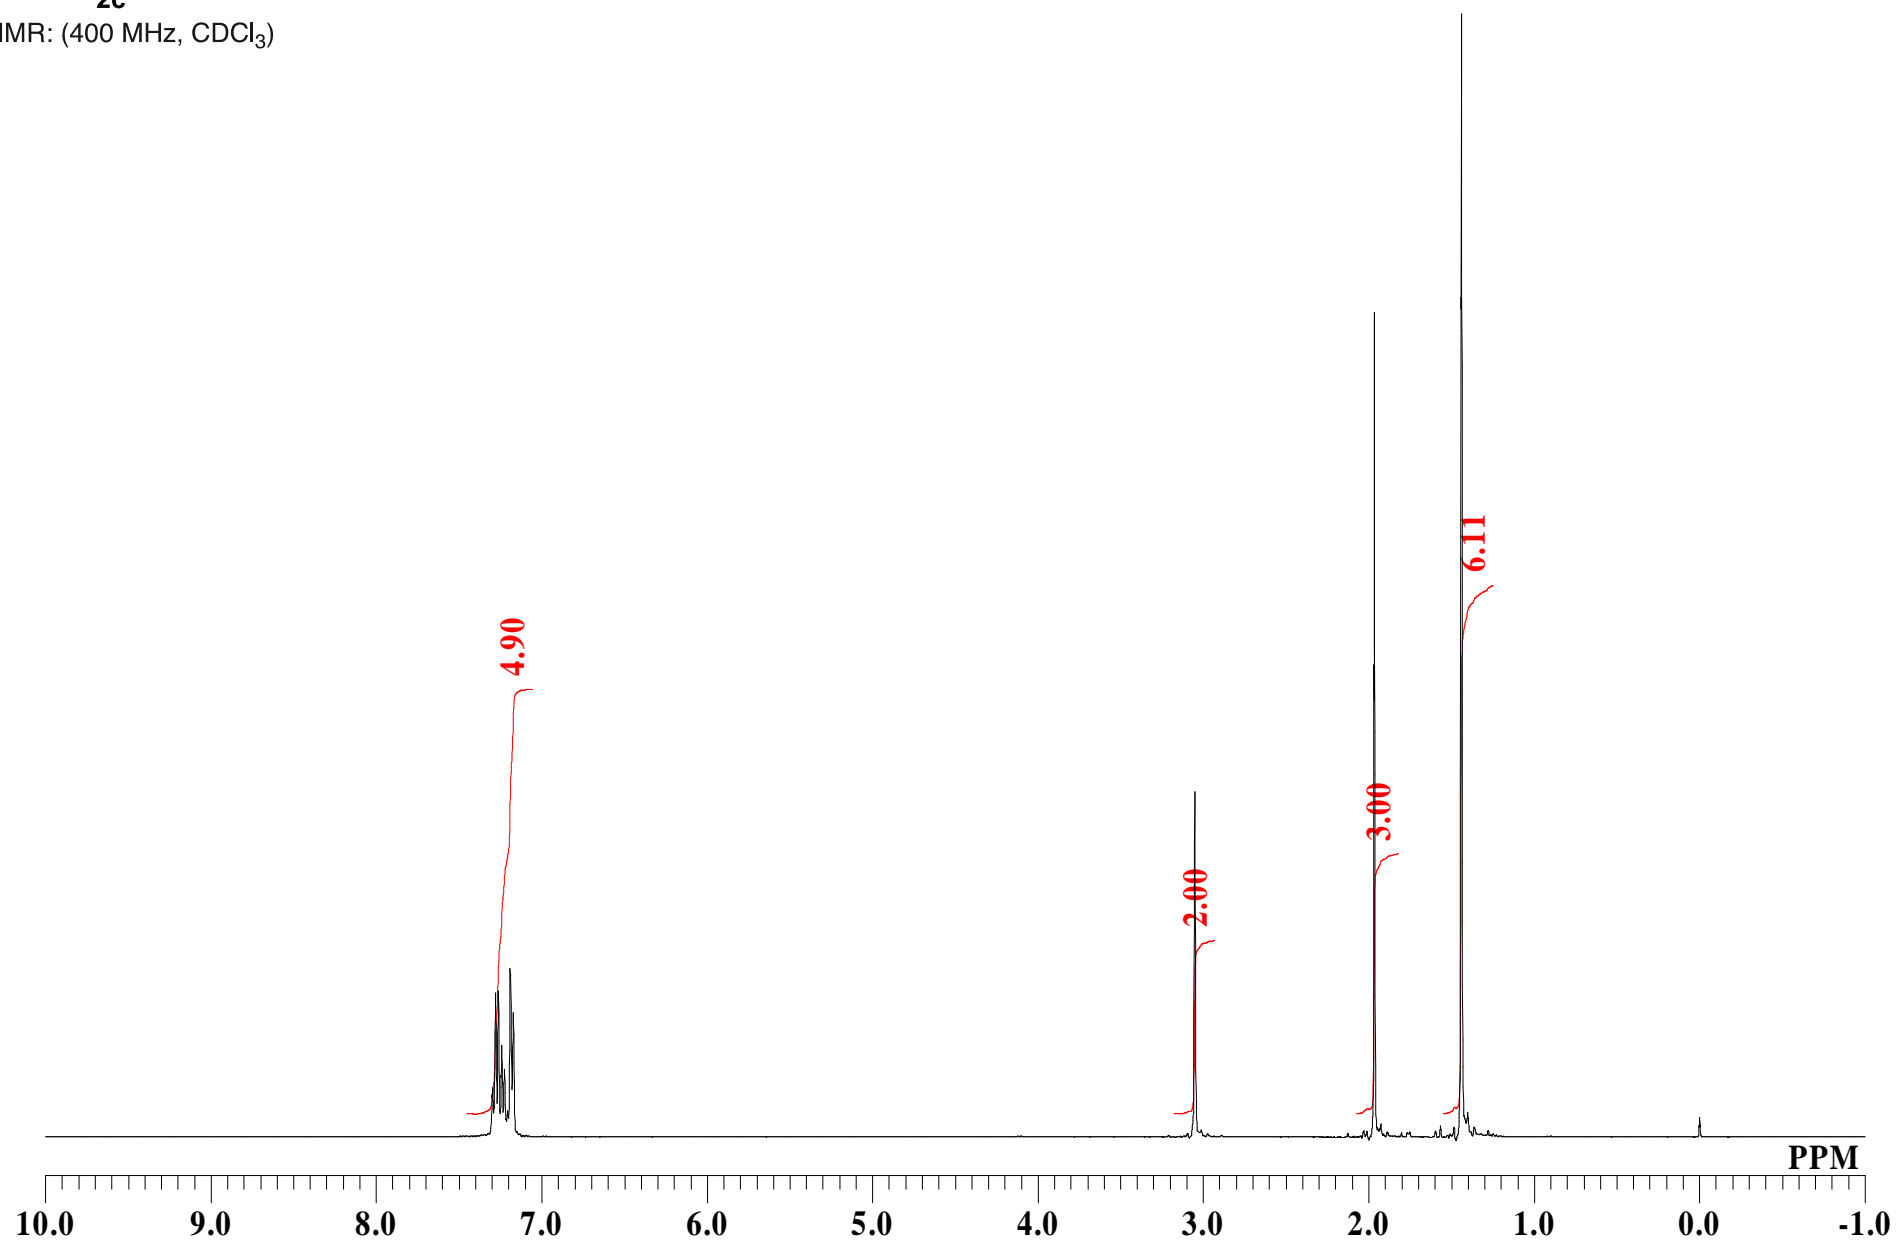



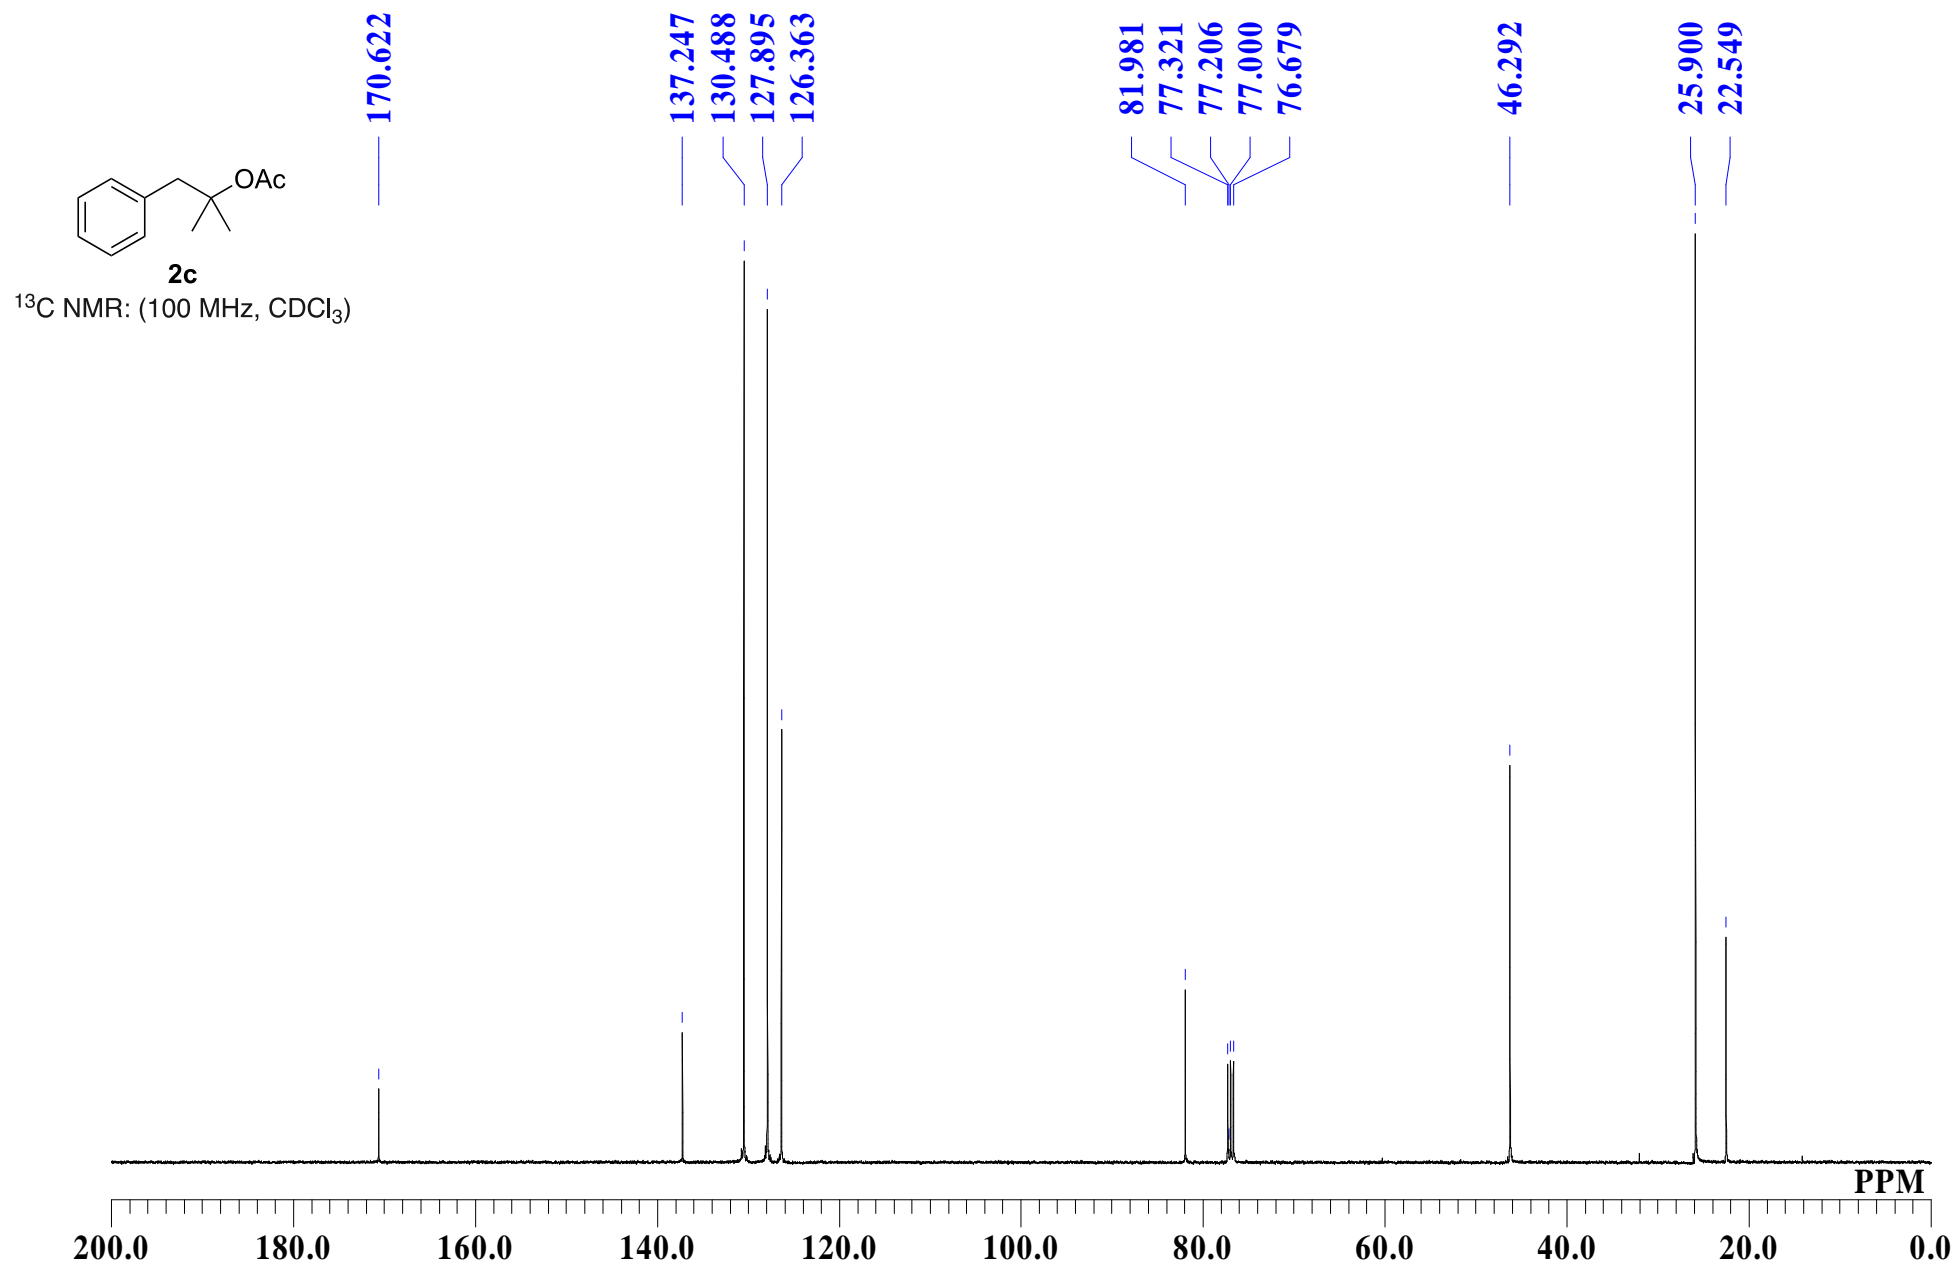

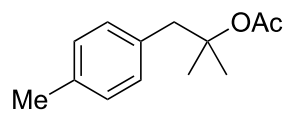

**2d**

$^1\text{H}$  NMR: (400 MHz,  $\text{CDCl}_3$ )

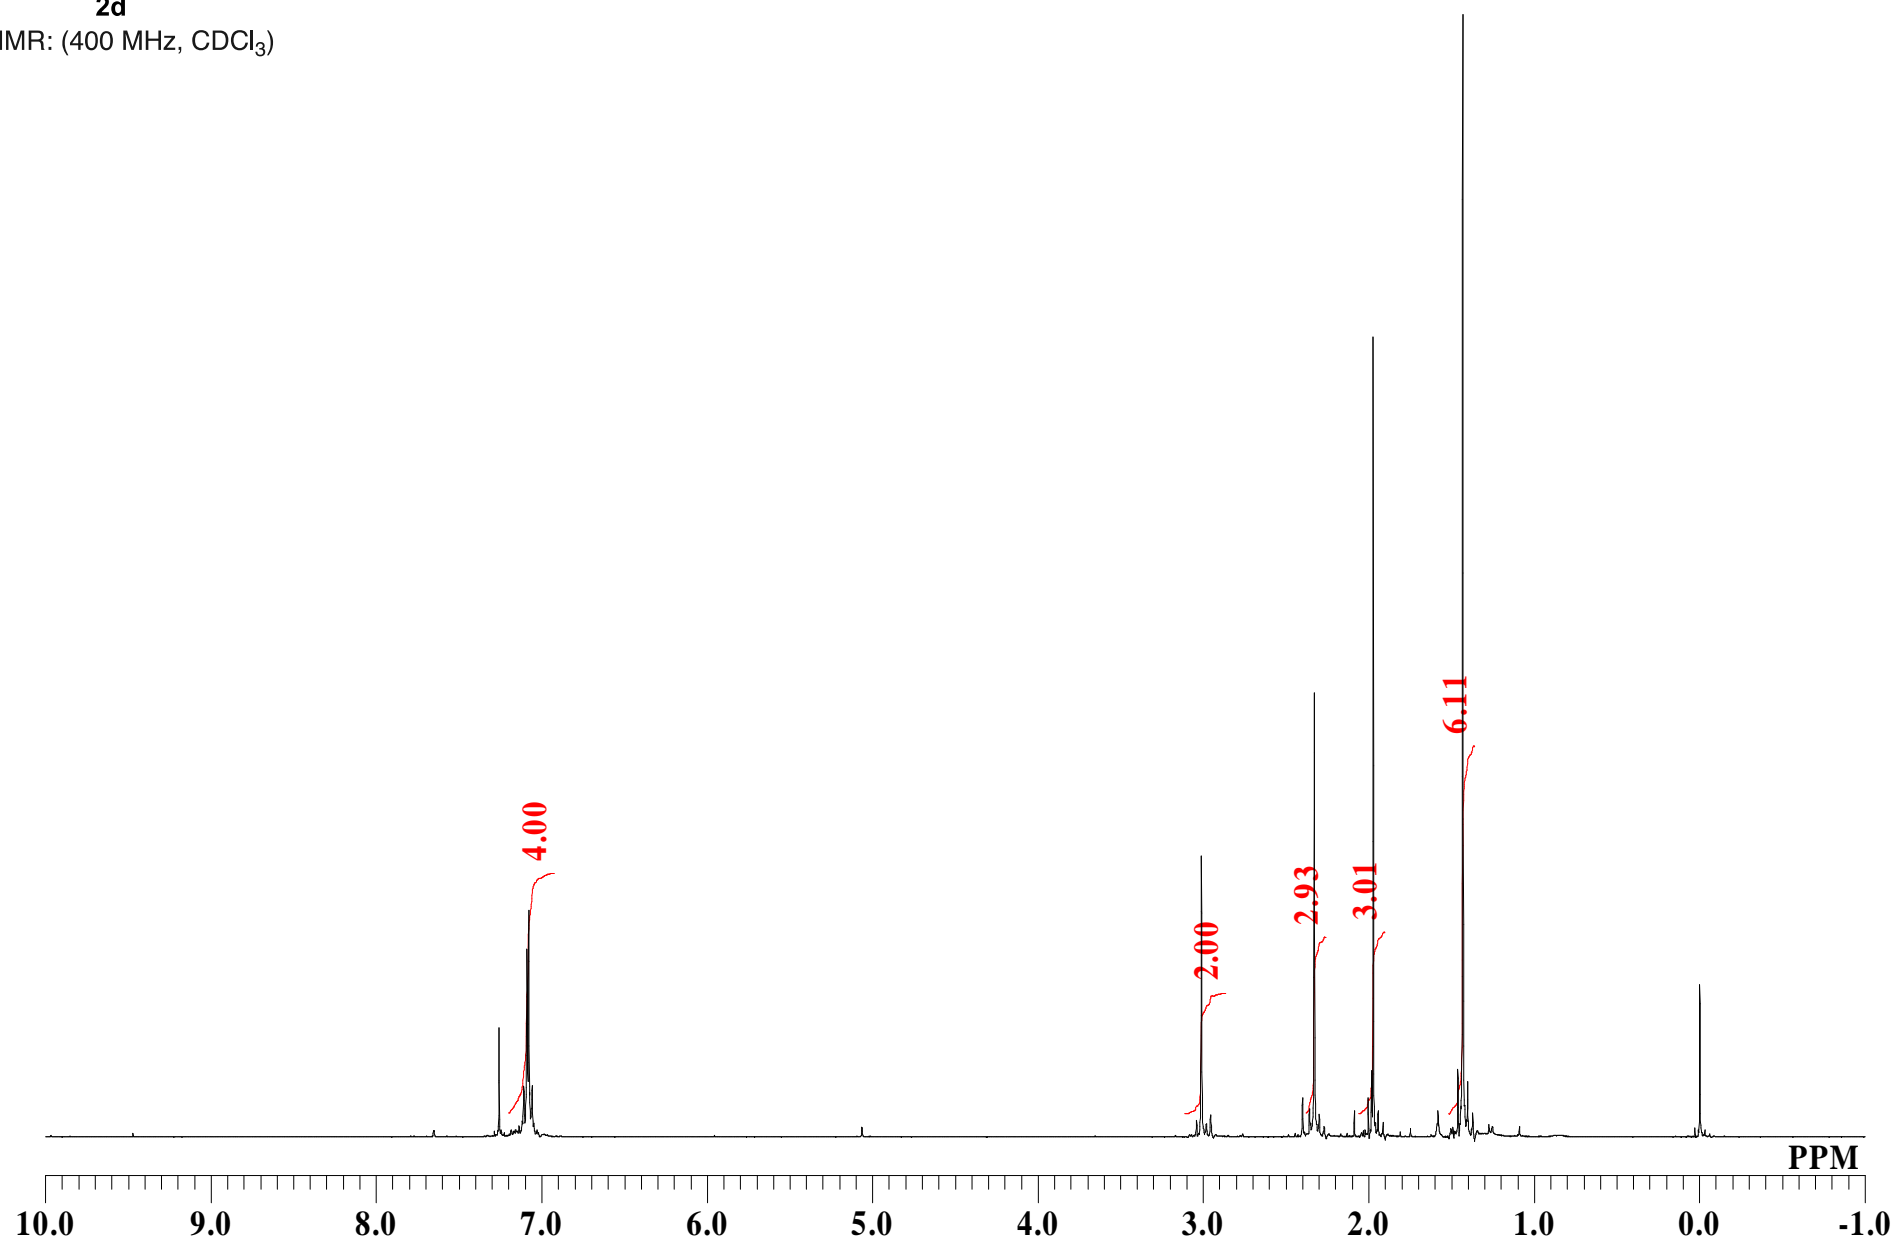

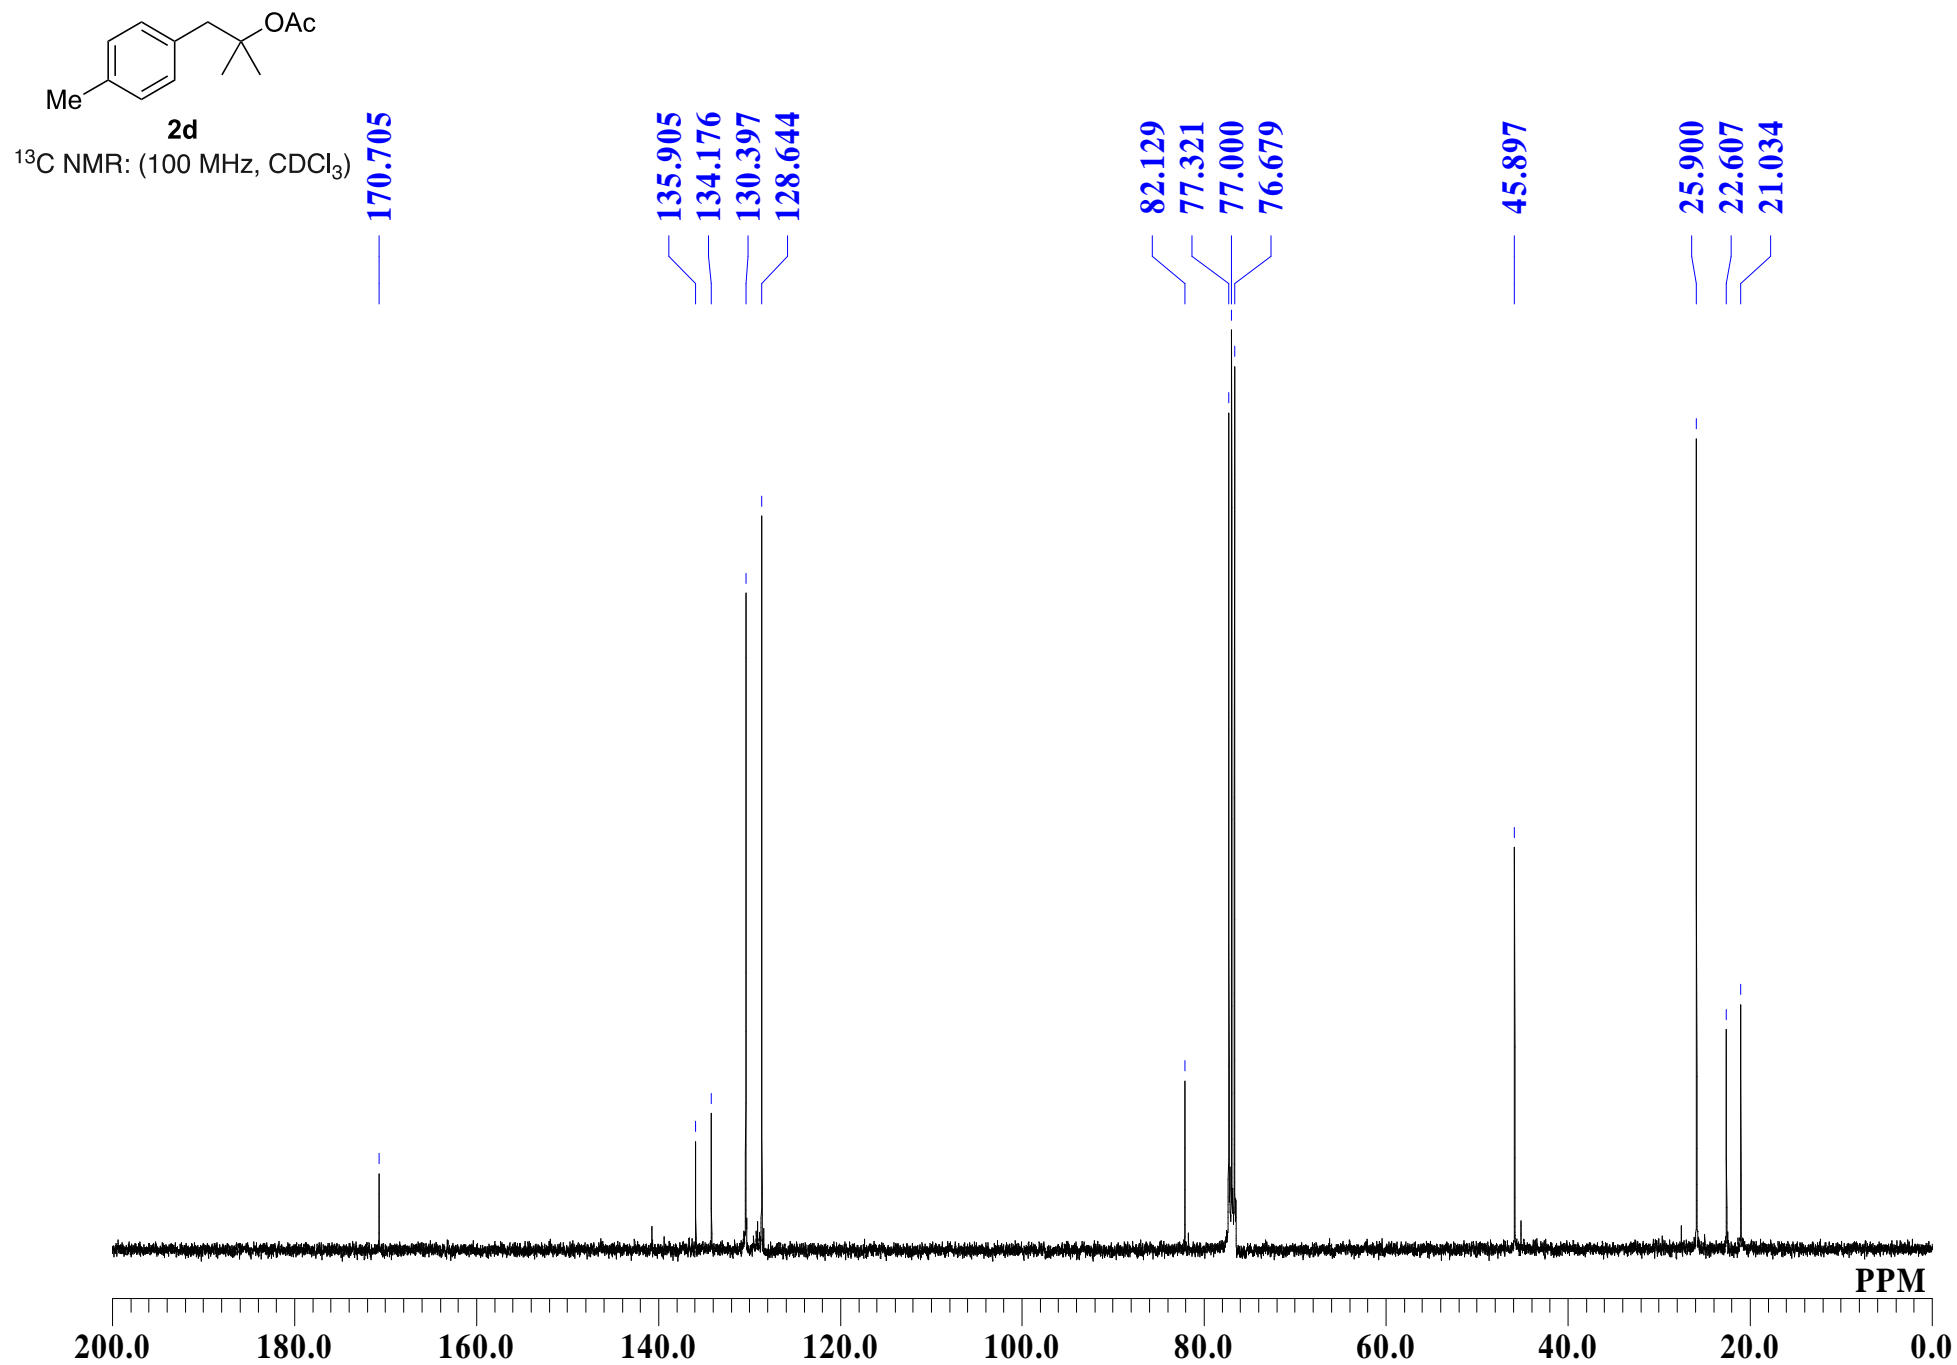

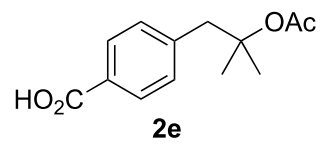

$^1\text{H}$  NMR: (400 MHz,  $\text{CDCl}_3$ )

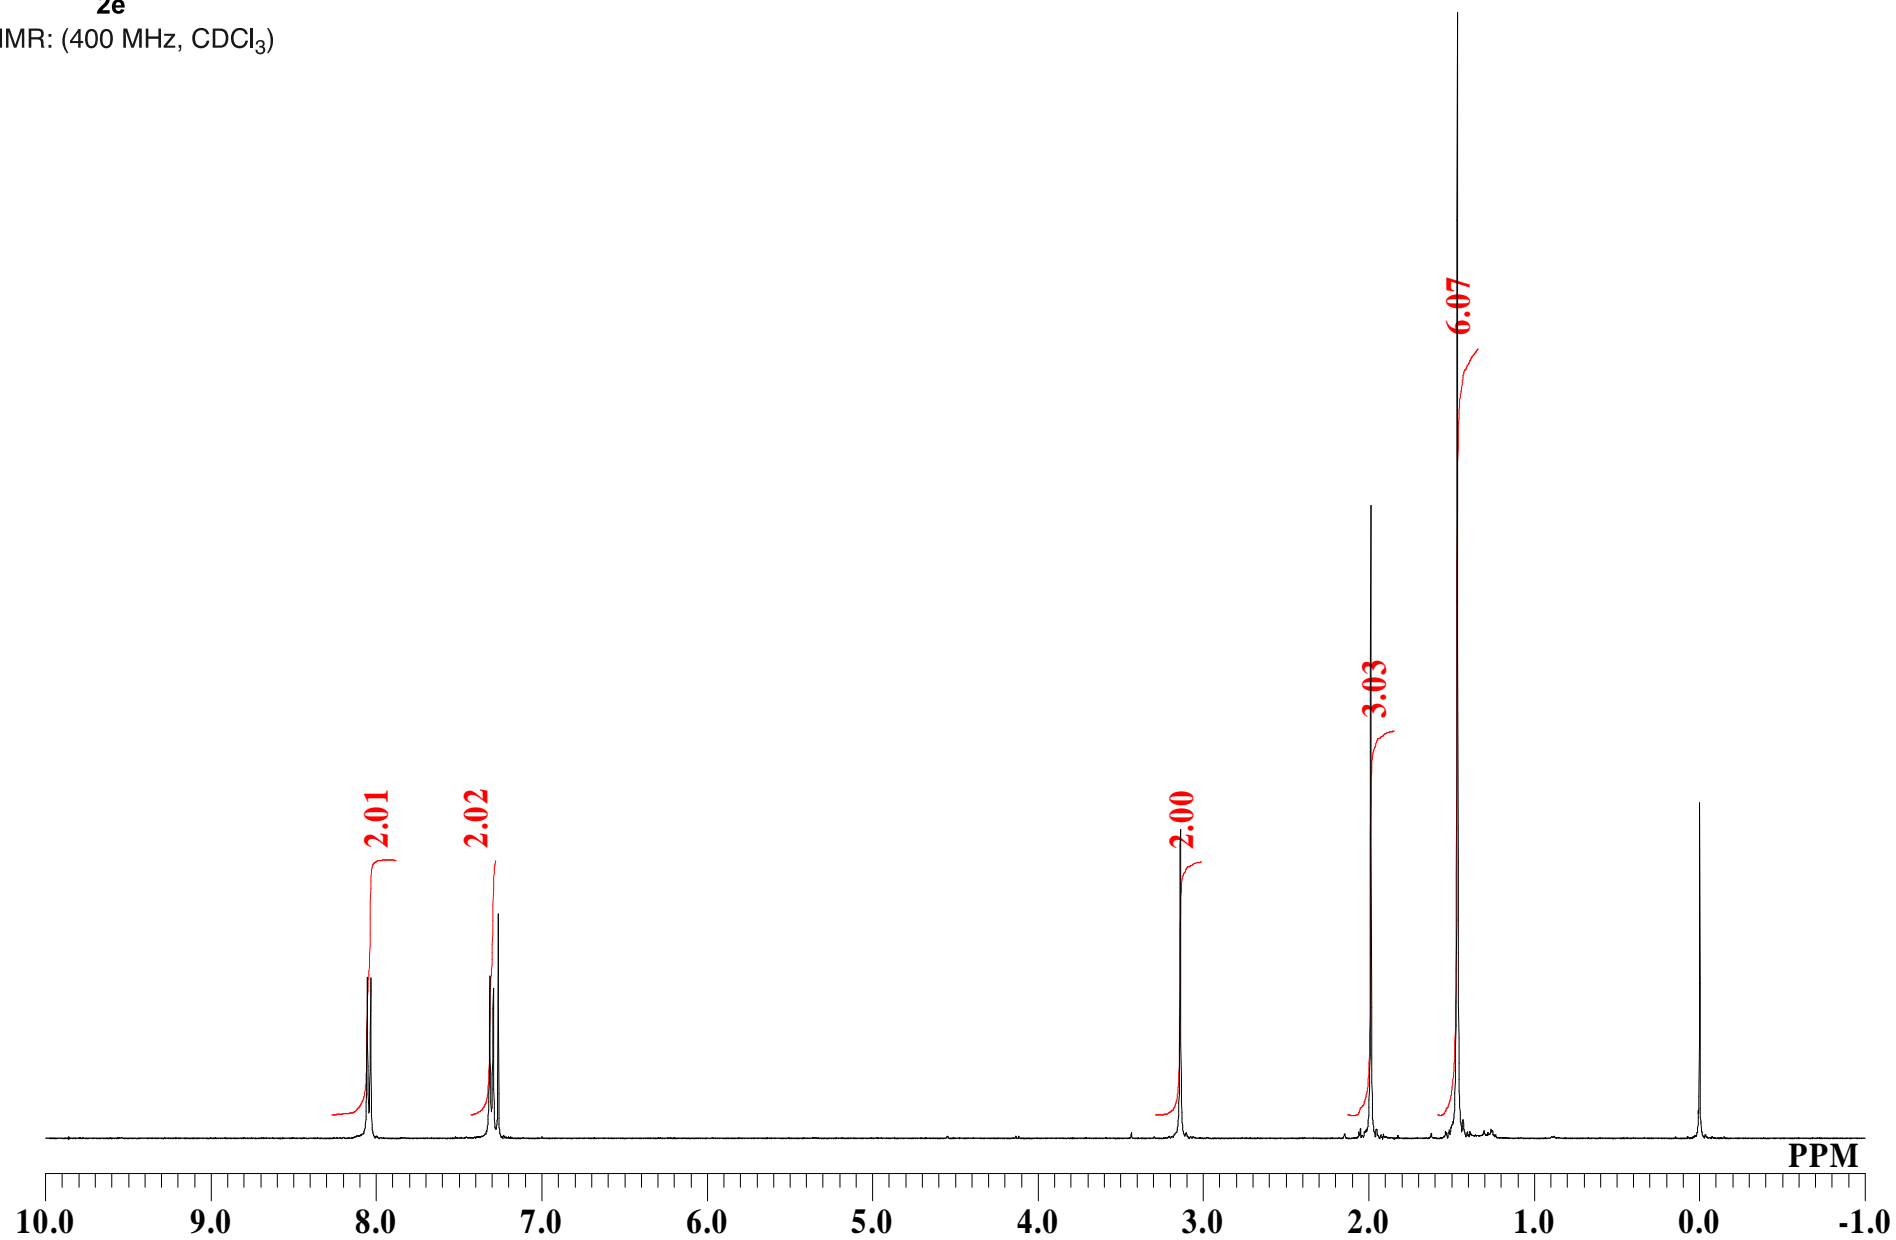

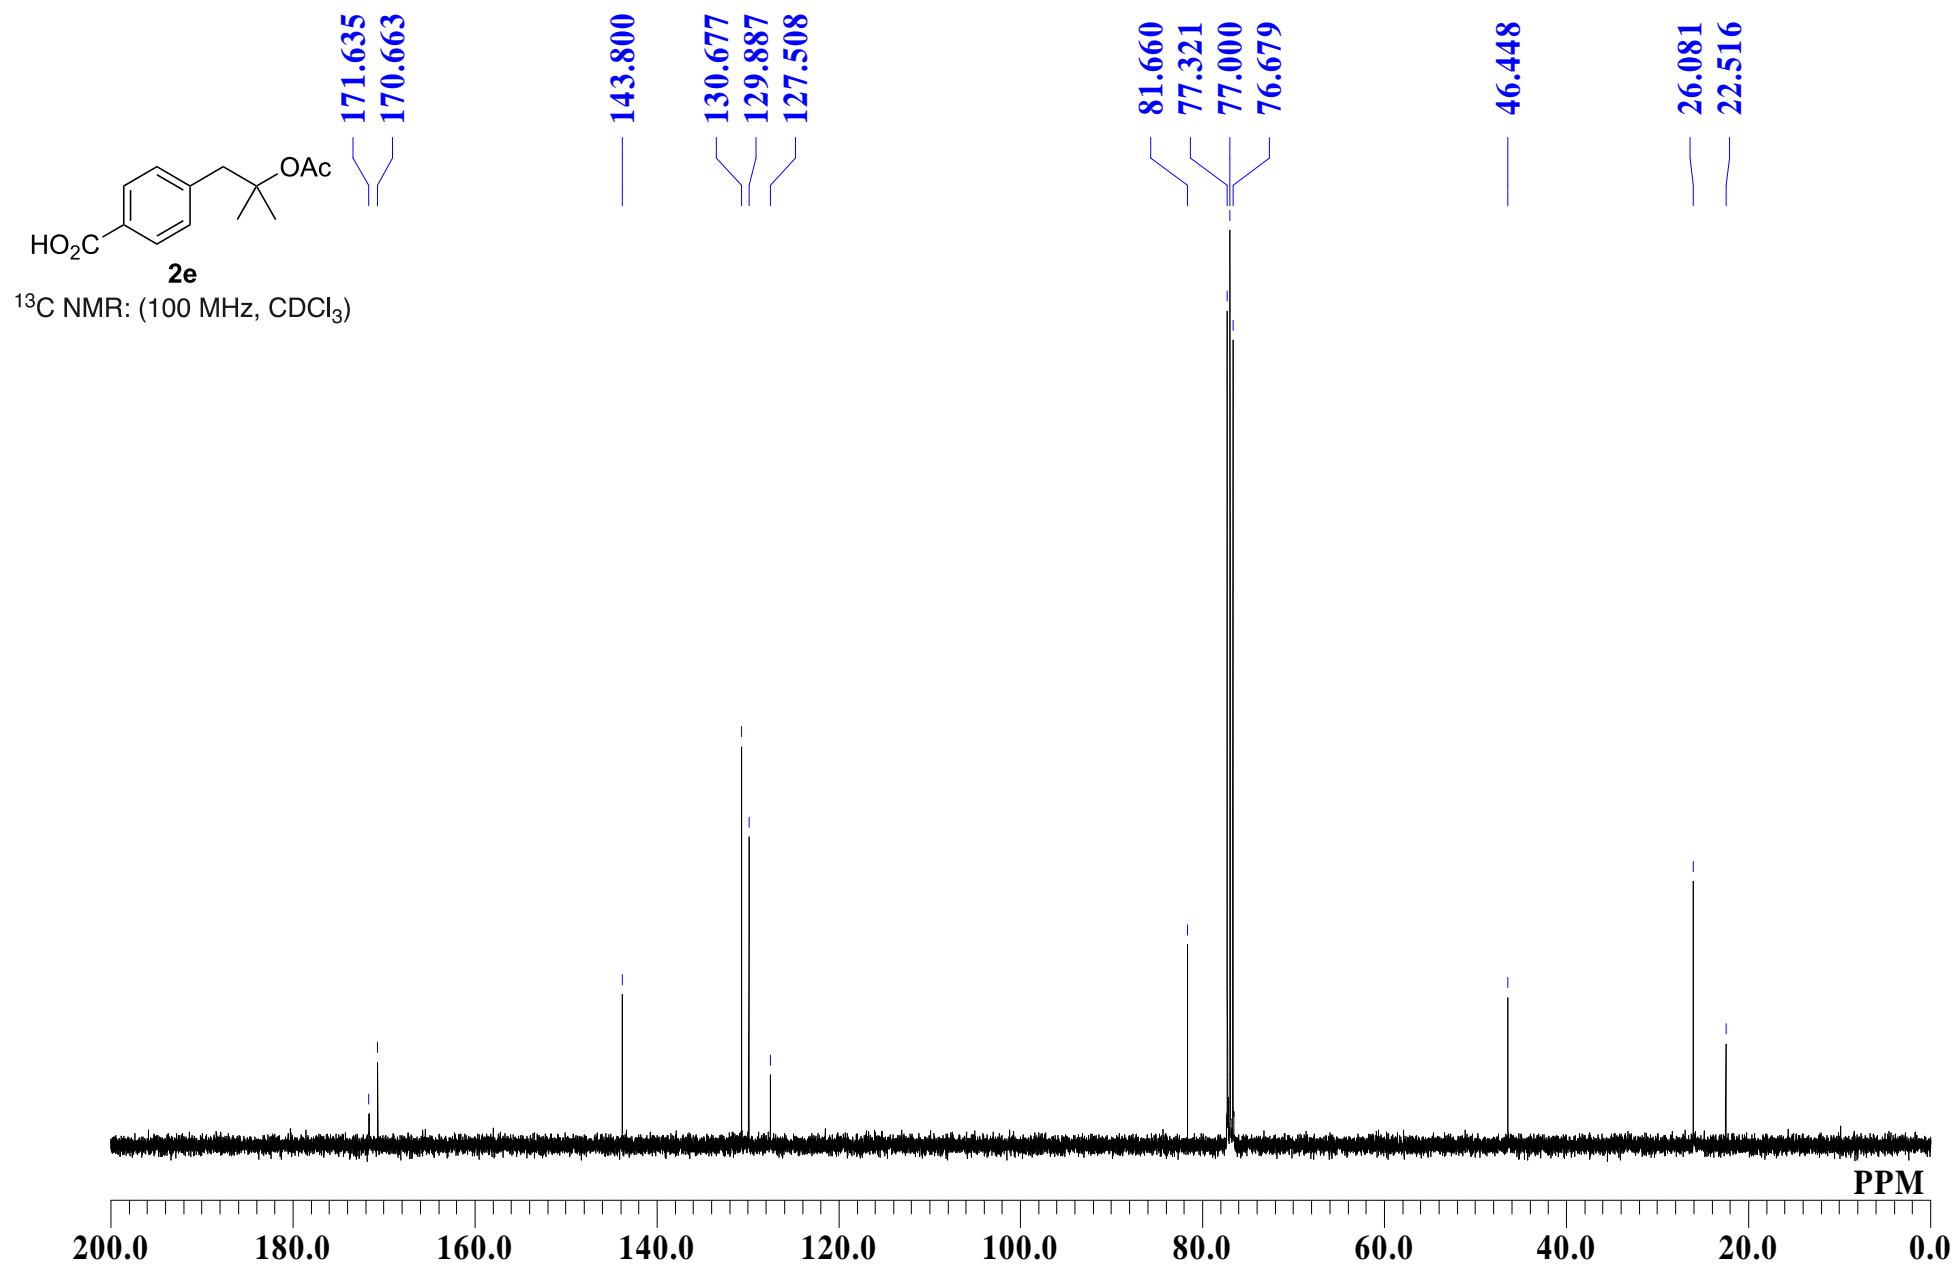

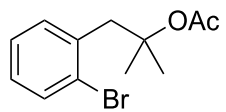

**2f**

$^1\text{H}$  NMR: (400 MHz,  $\text{CDCl}_3$ )

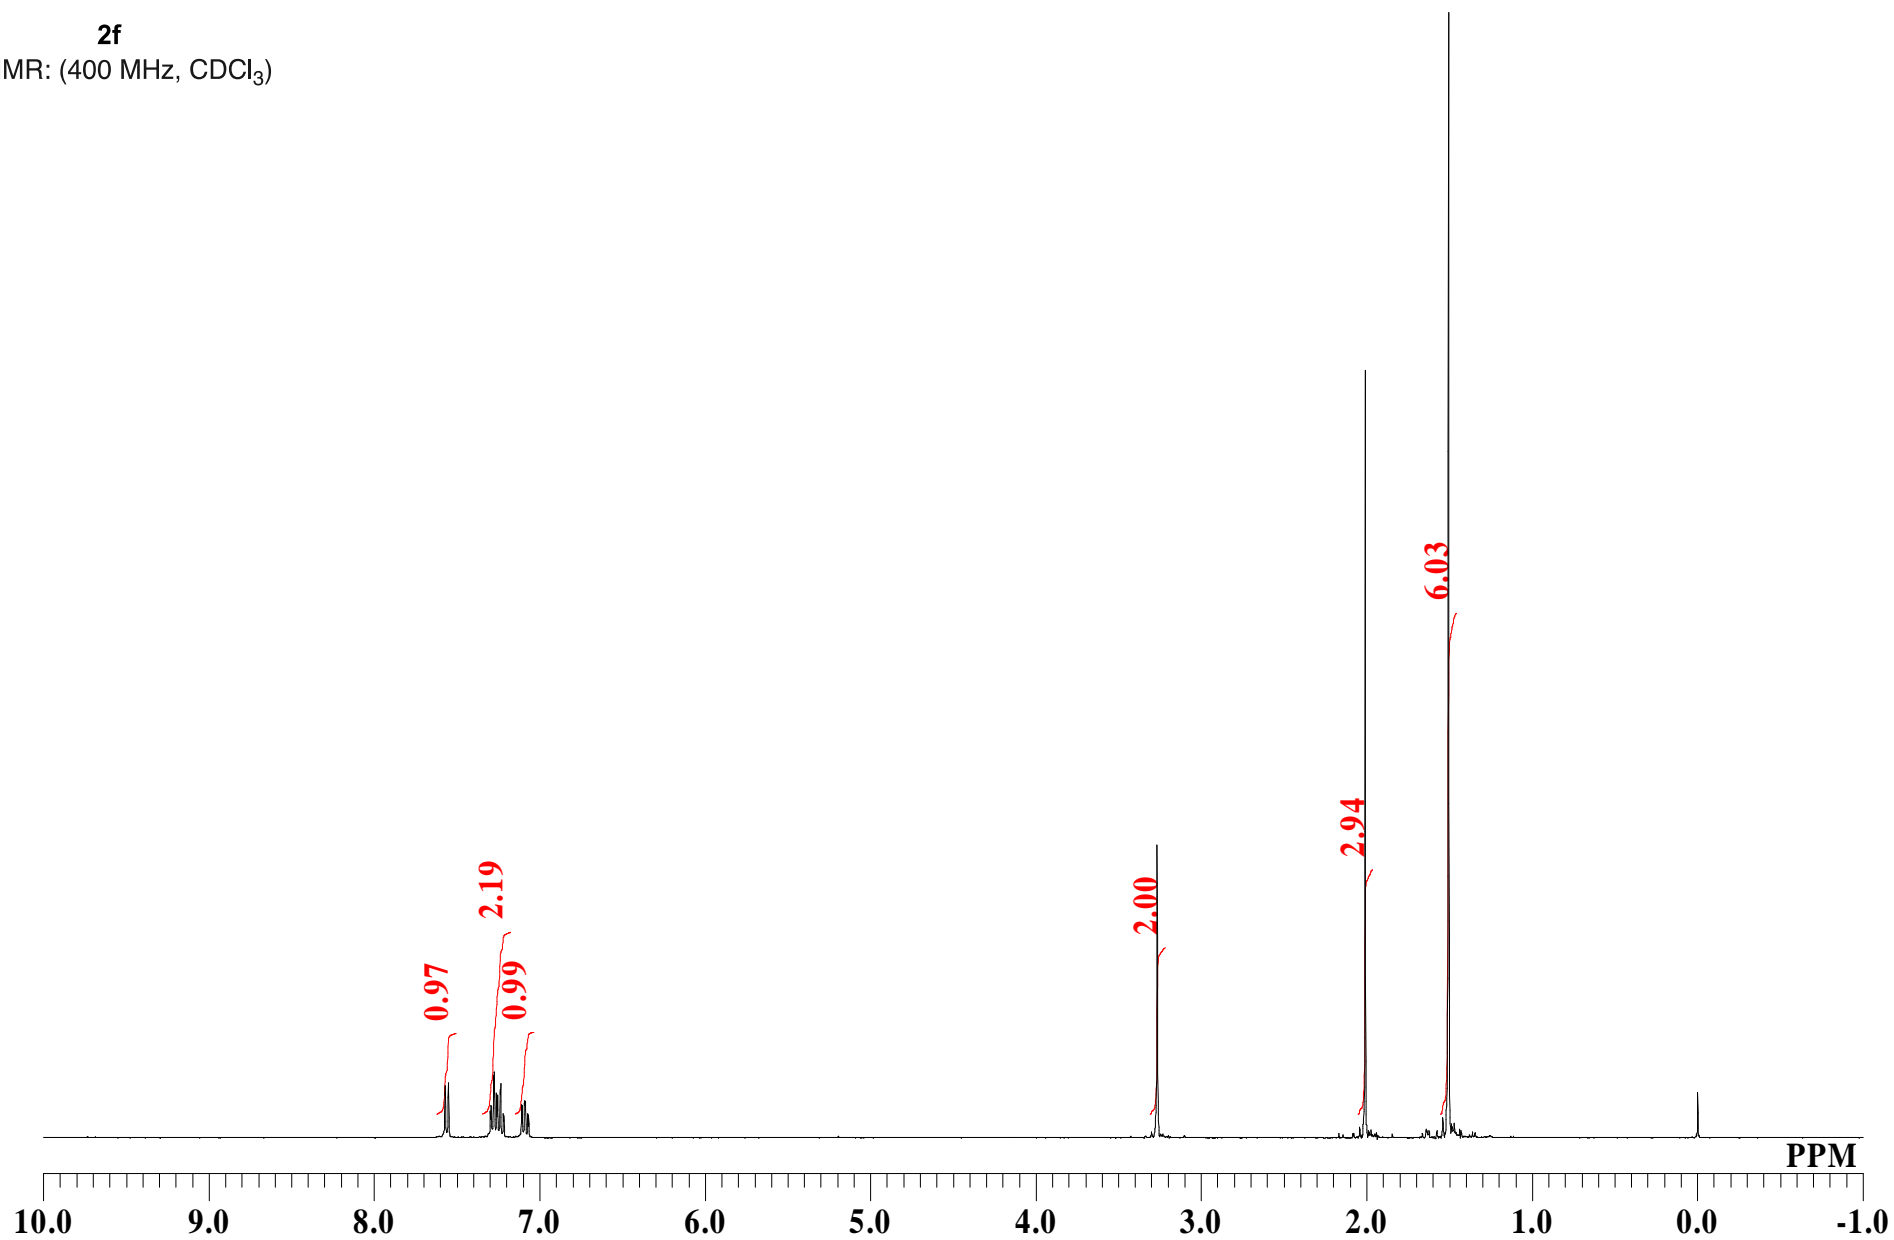

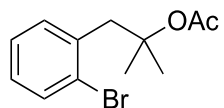

**2f**

$^{13}\text{C}$  NMR: (100 MHz,  $\text{CDCl}_3$ )

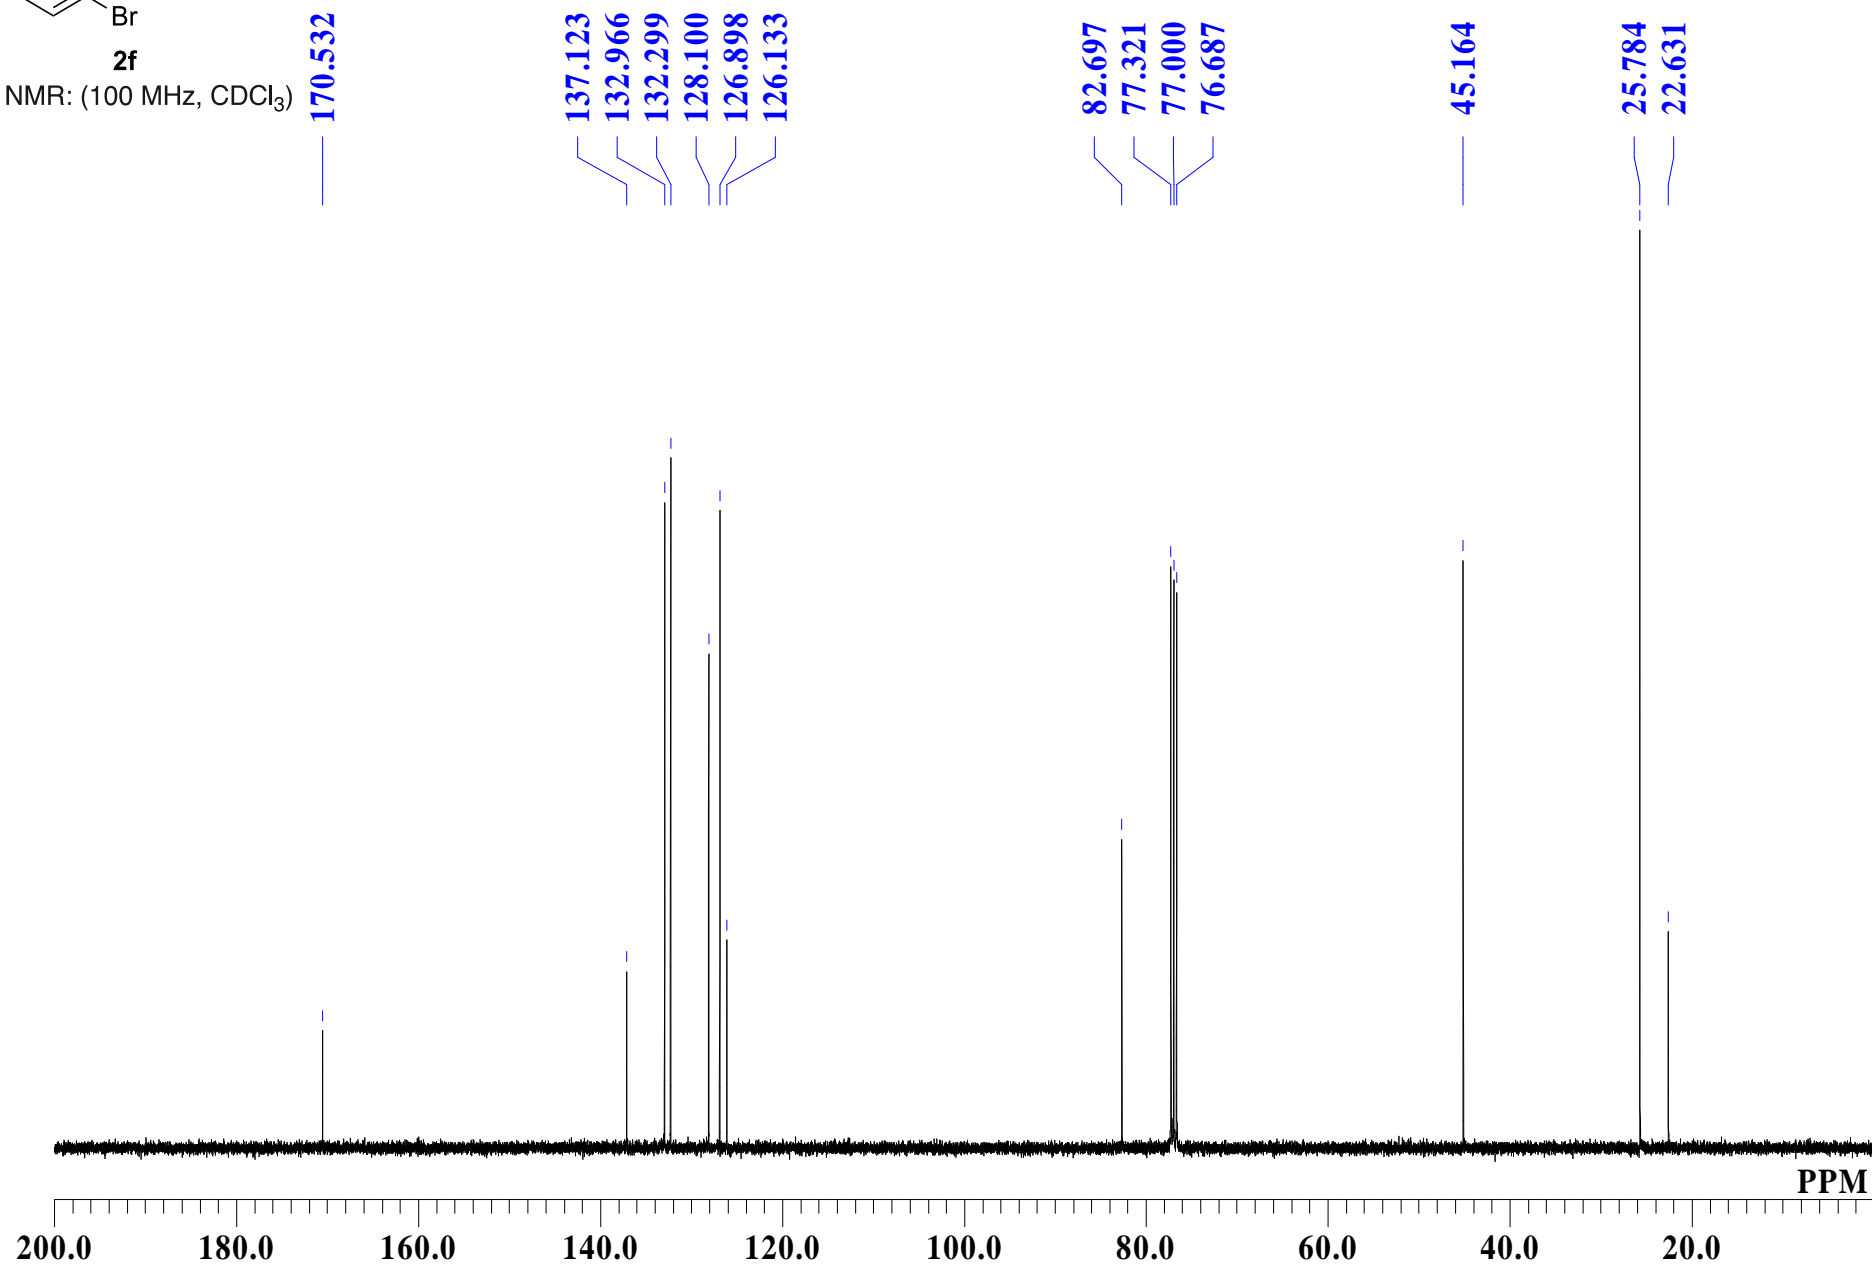

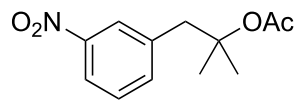

**2g**

<sup>1</sup>H NMR: (400 MHz, CDCl<sub>3</sub>)

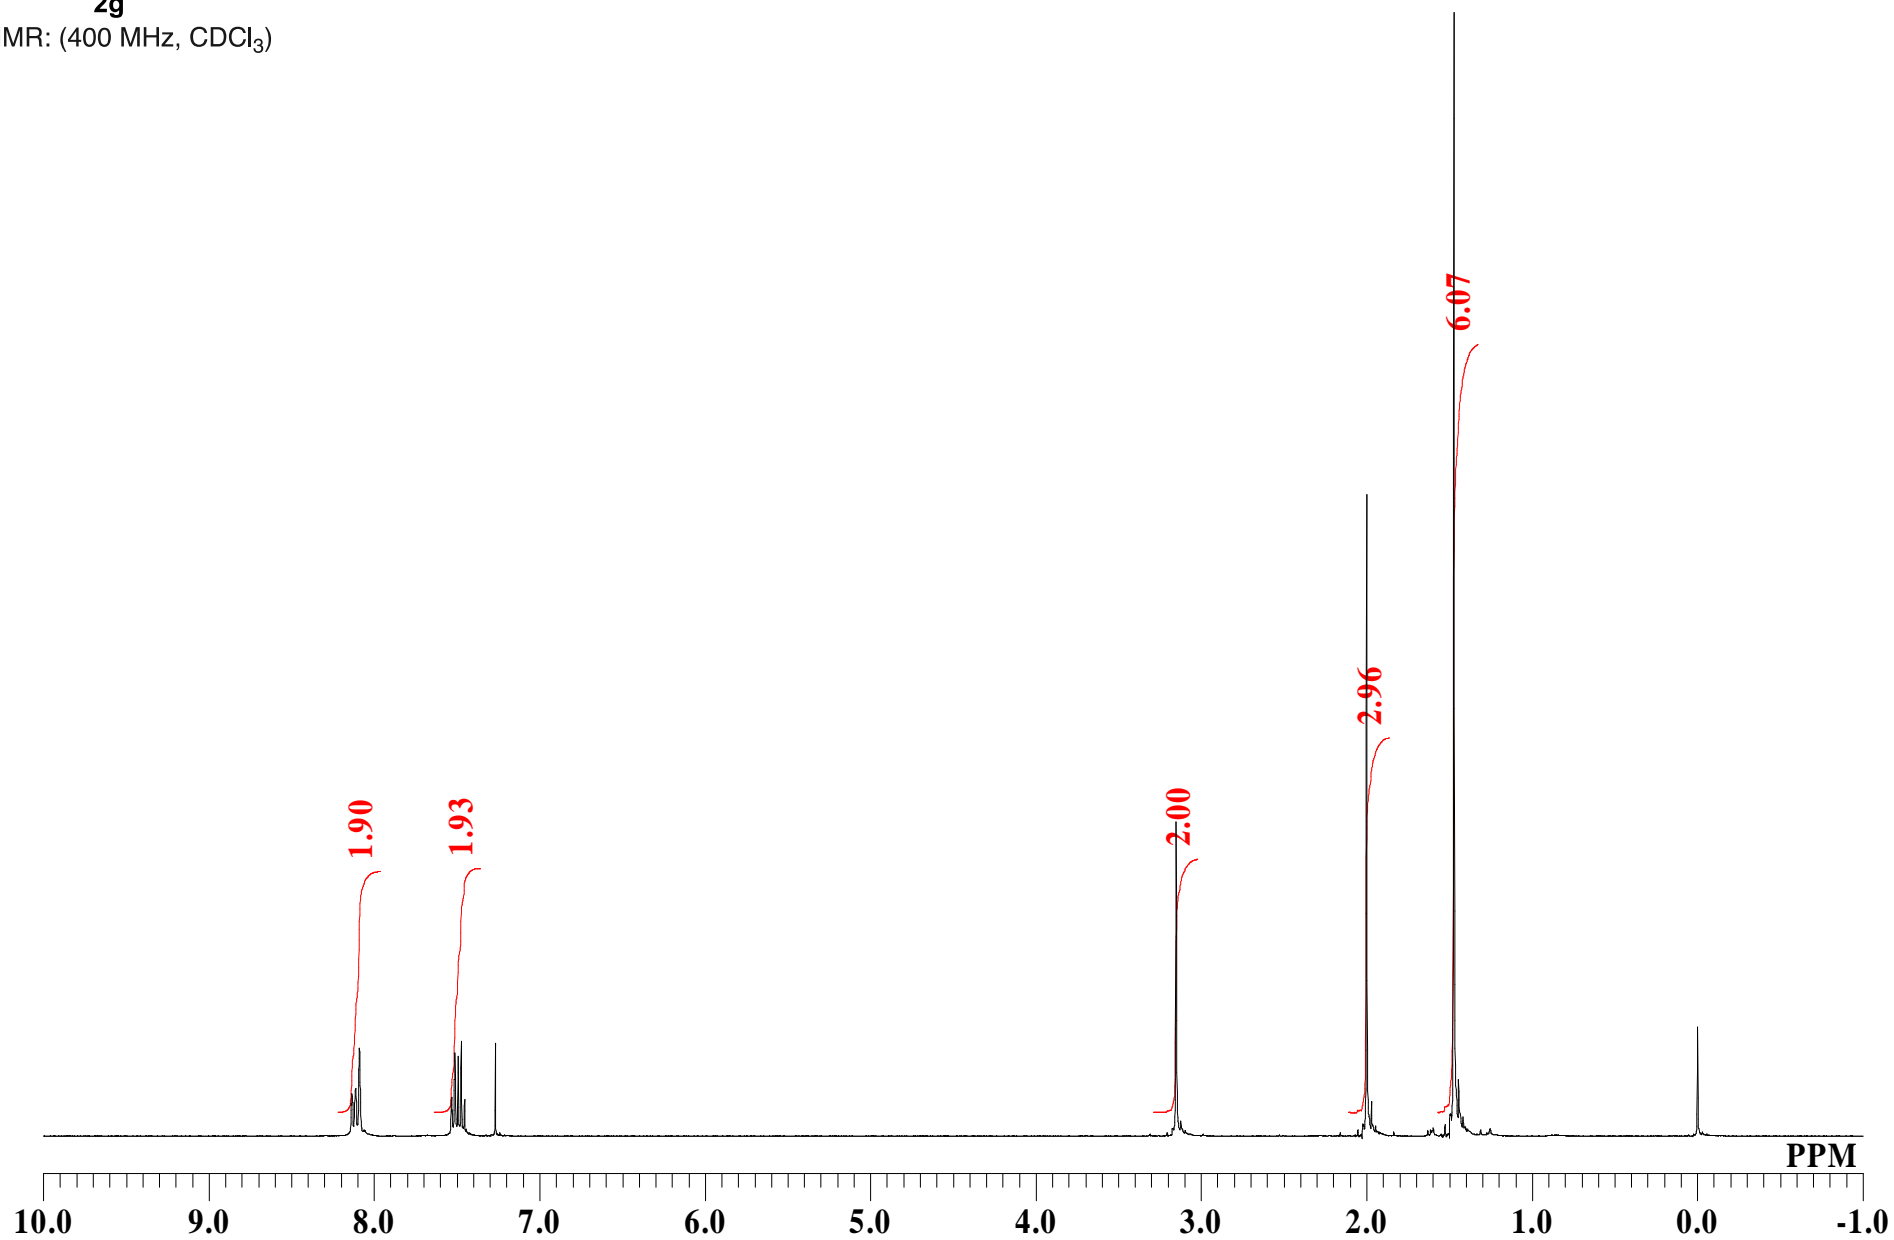



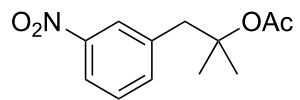

**2g**

$^{13}\text{C}$  NMR: (100 MHz,  $\text{CDCl}_3$ )

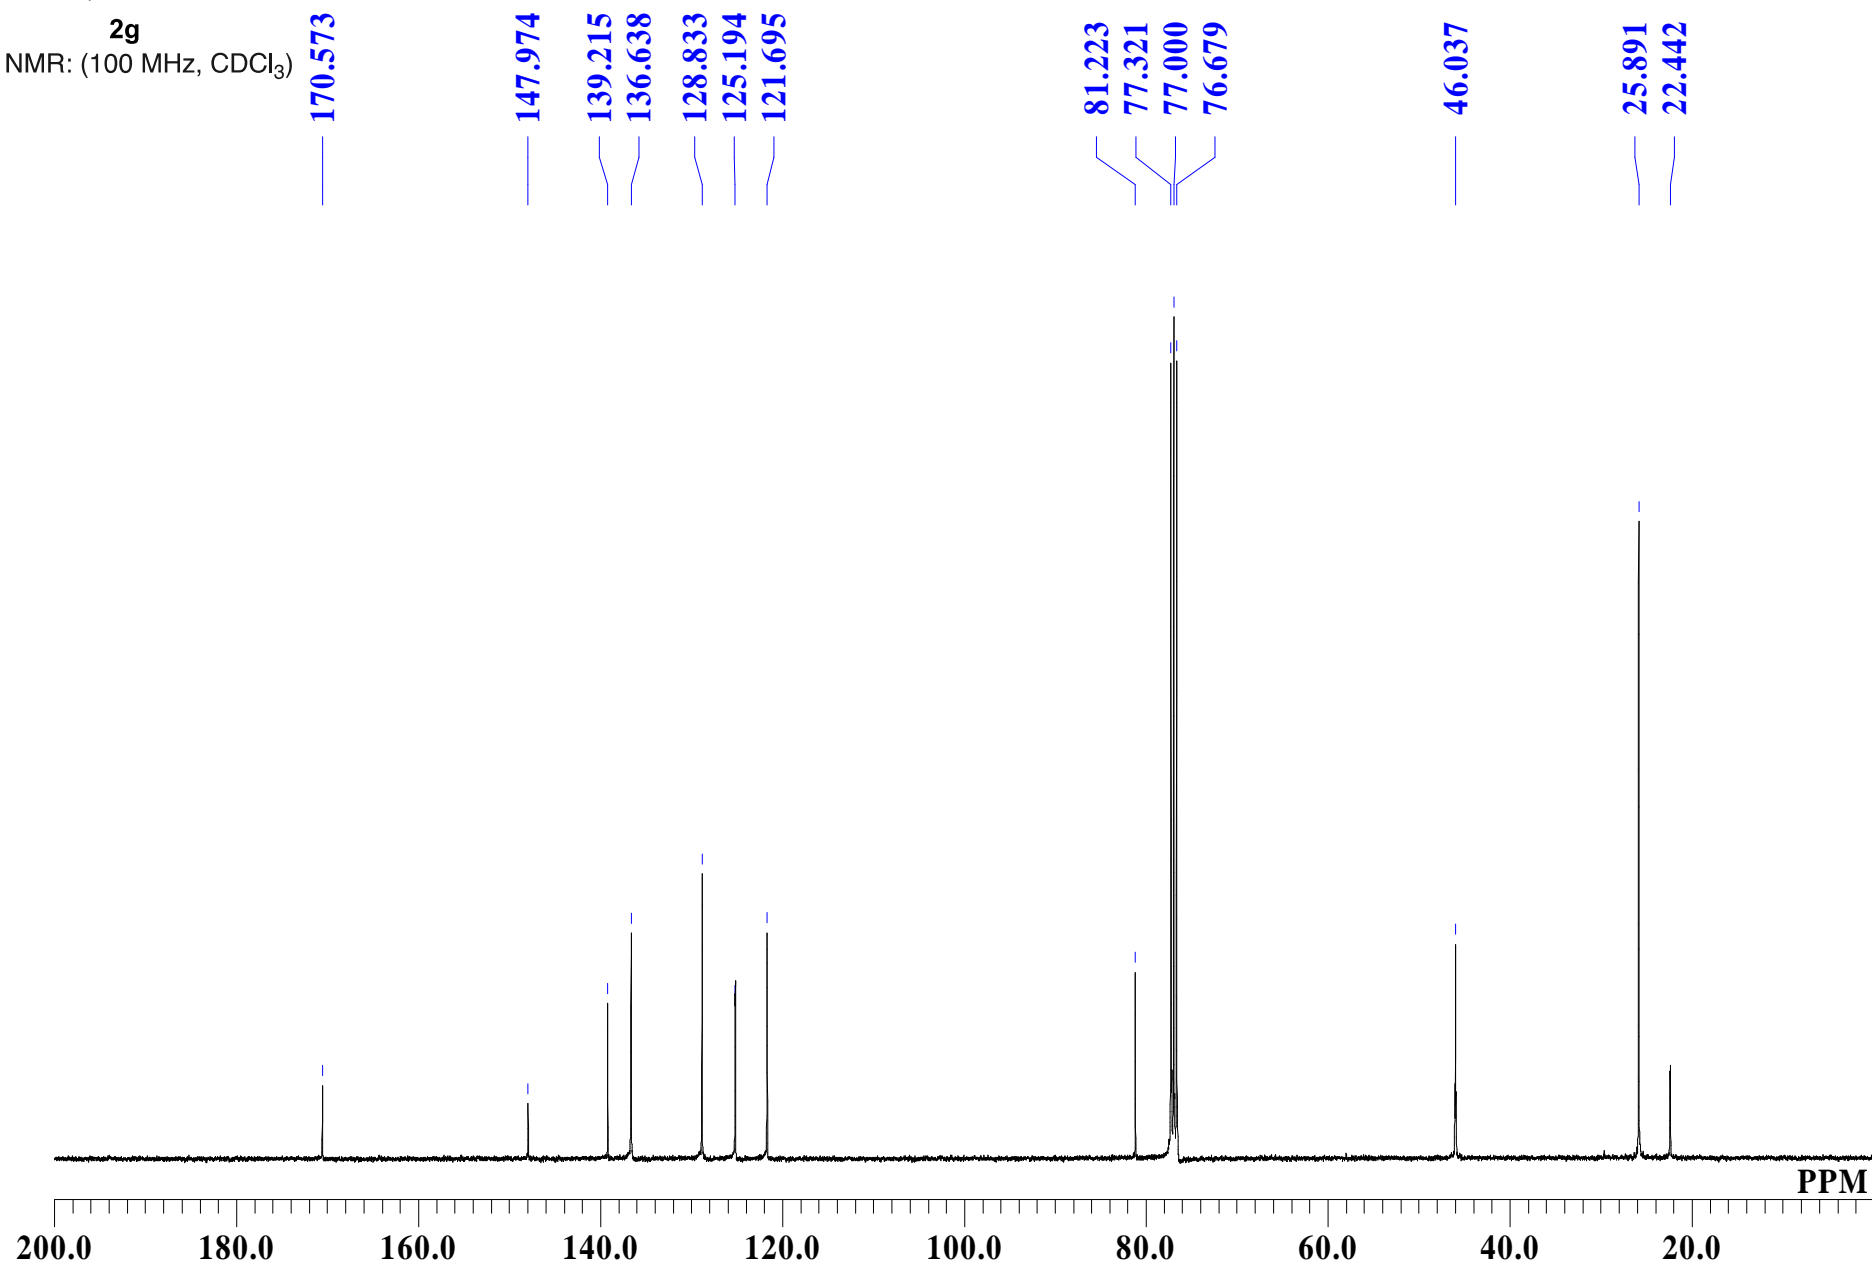

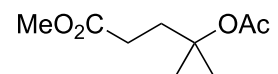

**2h**

$^1\text{H}$  NMR: (400 MHz,  $\text{CDCl}_3$ )

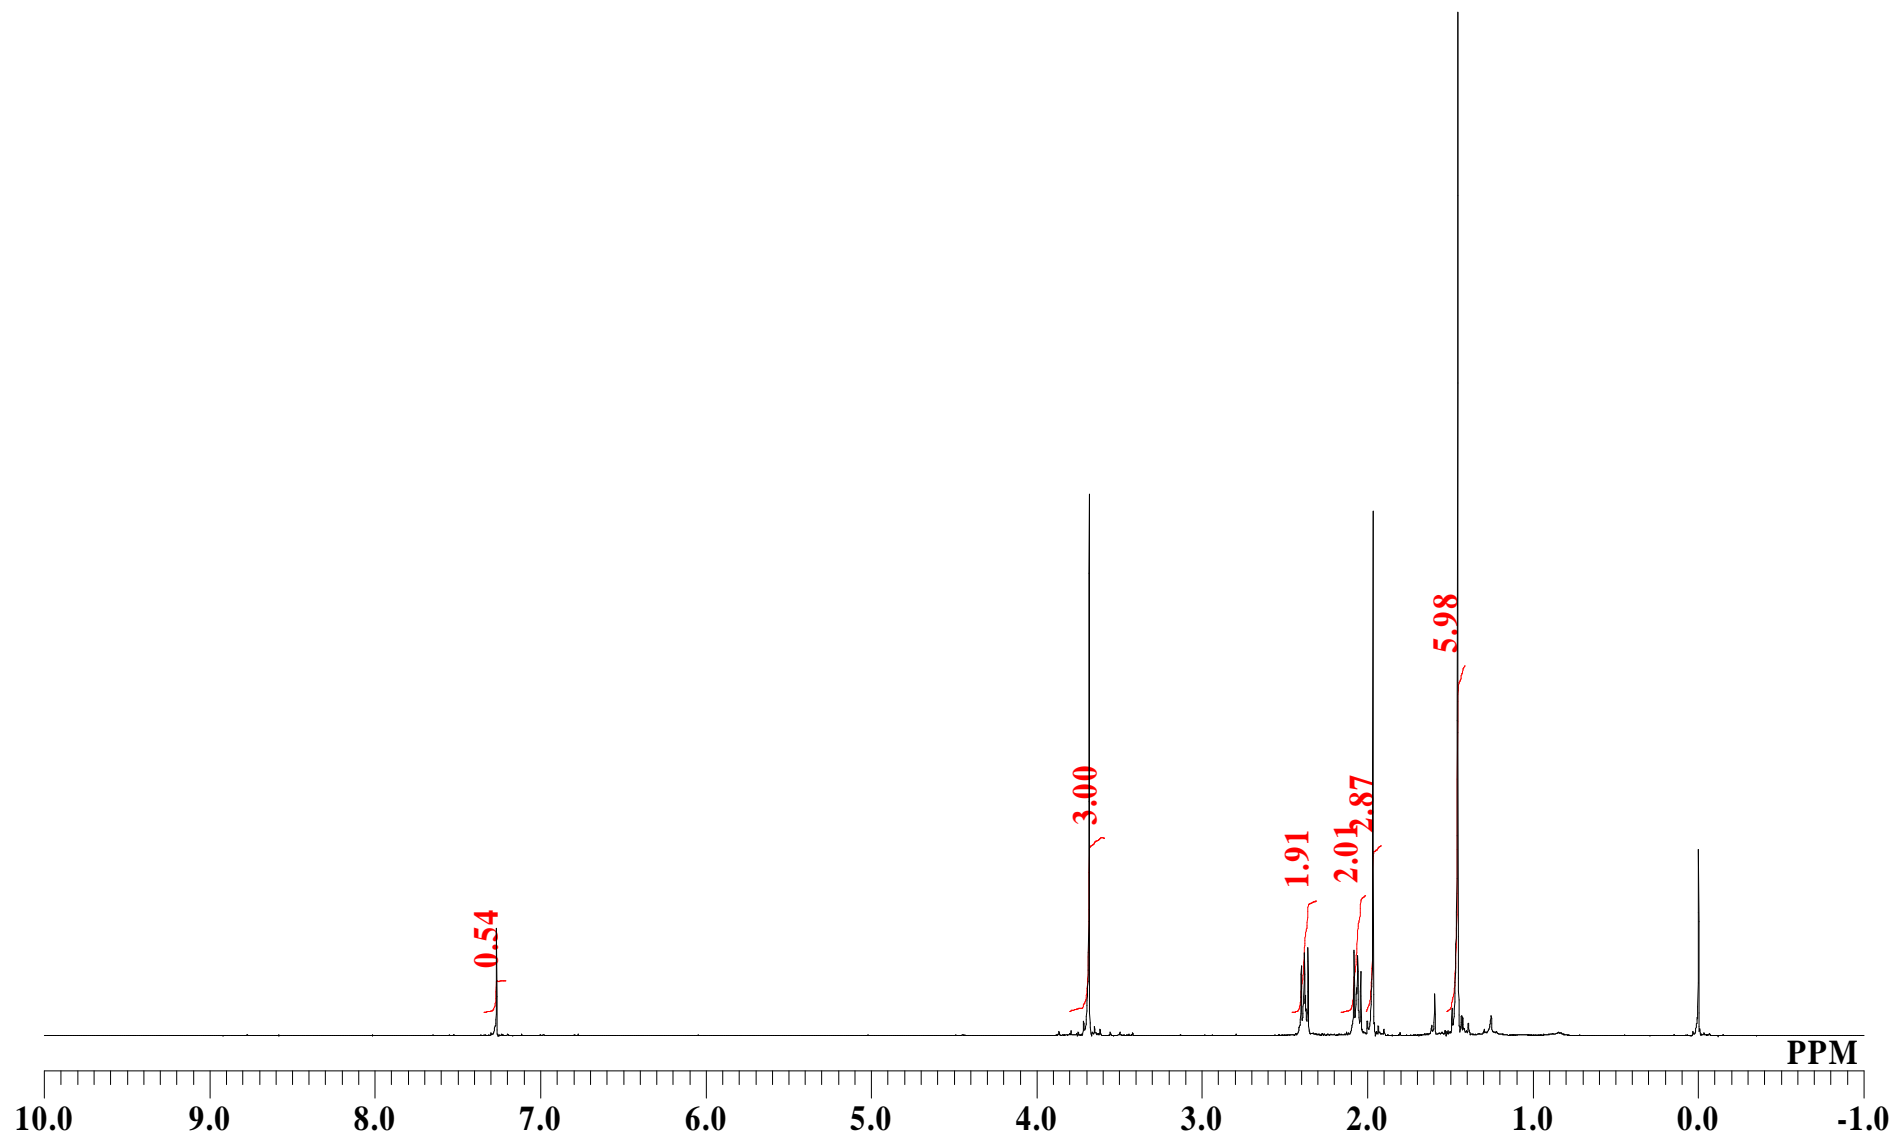

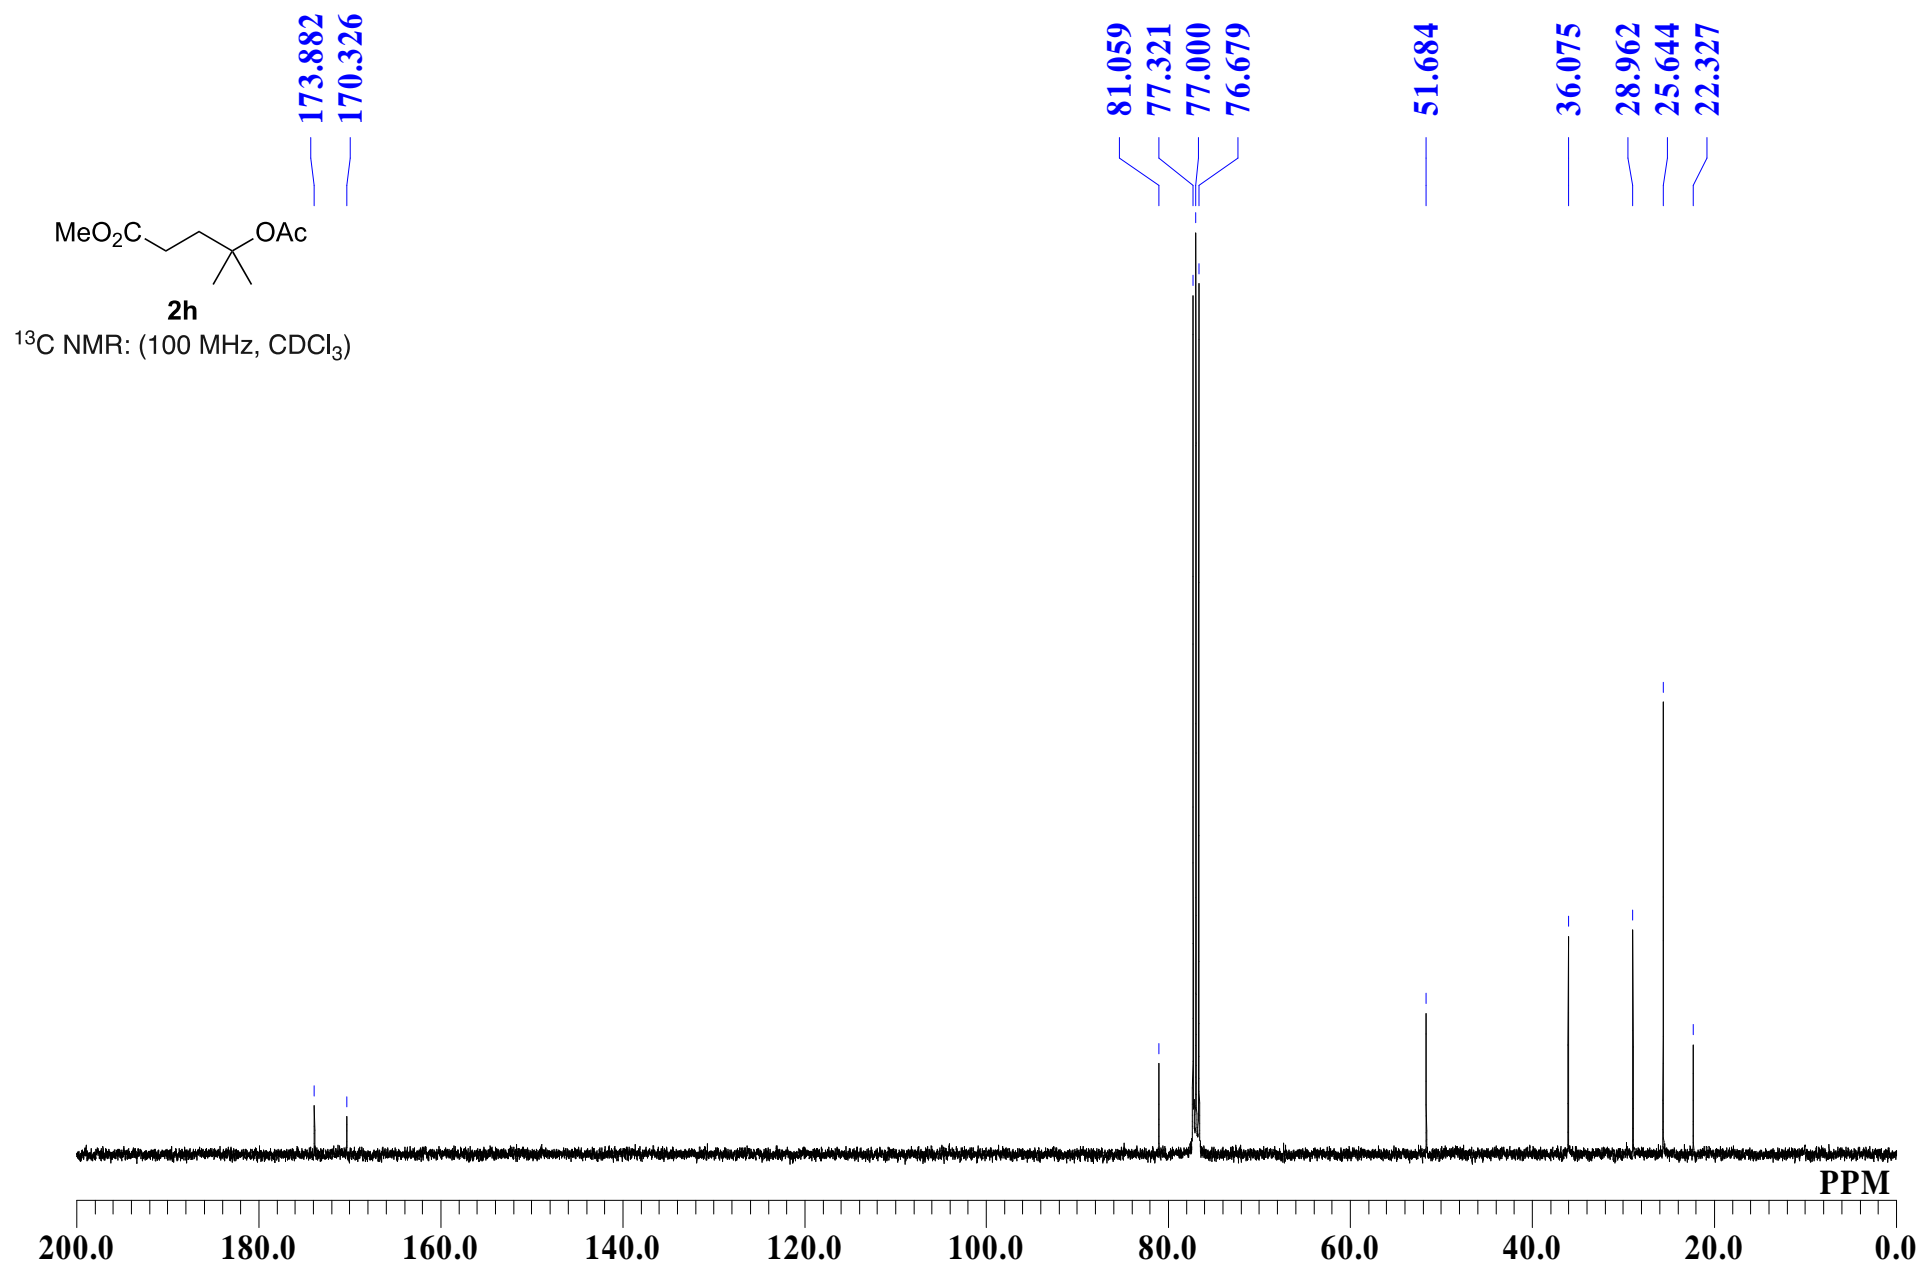

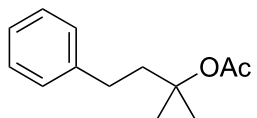

**2i**

<sup>1</sup>H NMR: (400 MHz, CDCl<sub>3</sub>)

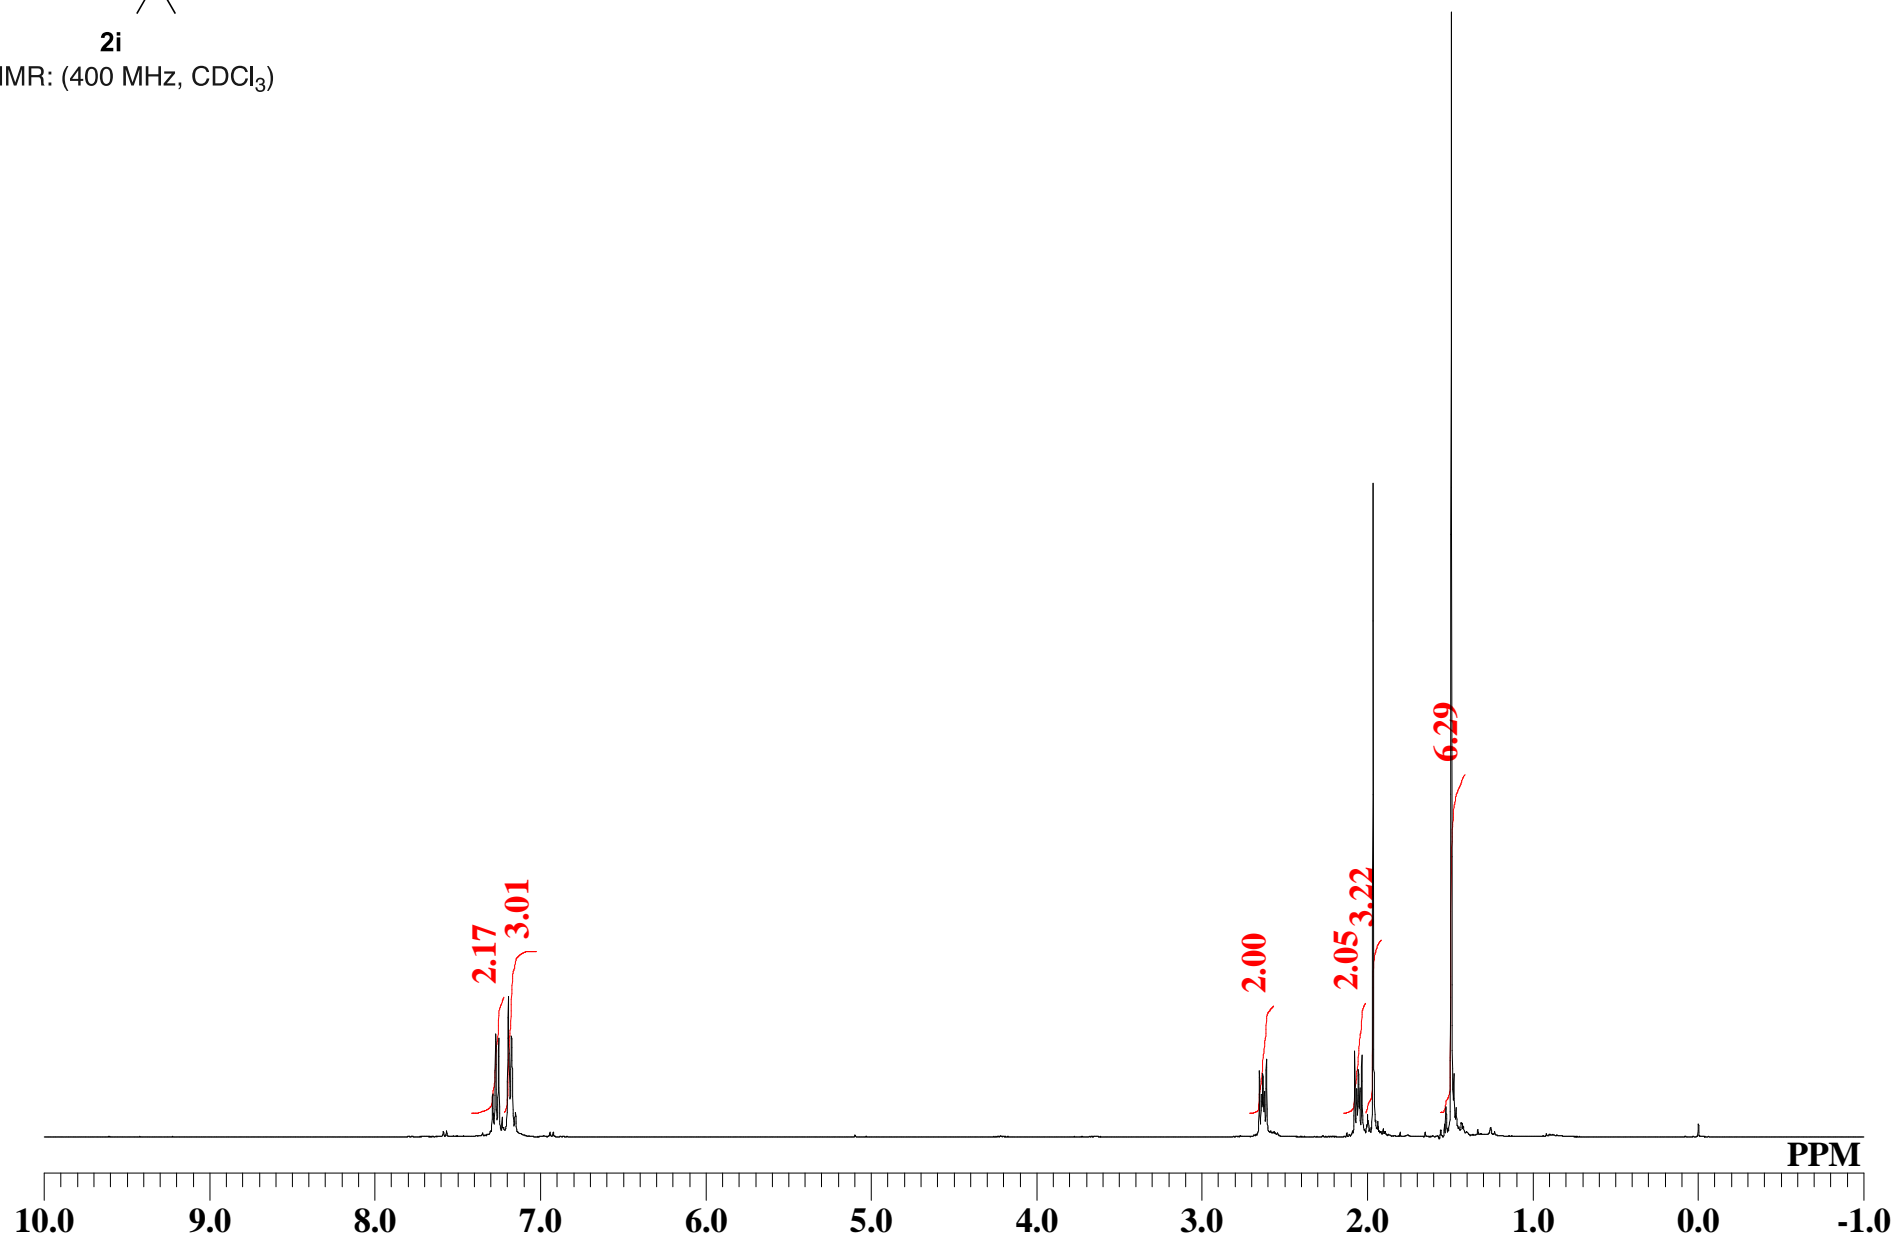

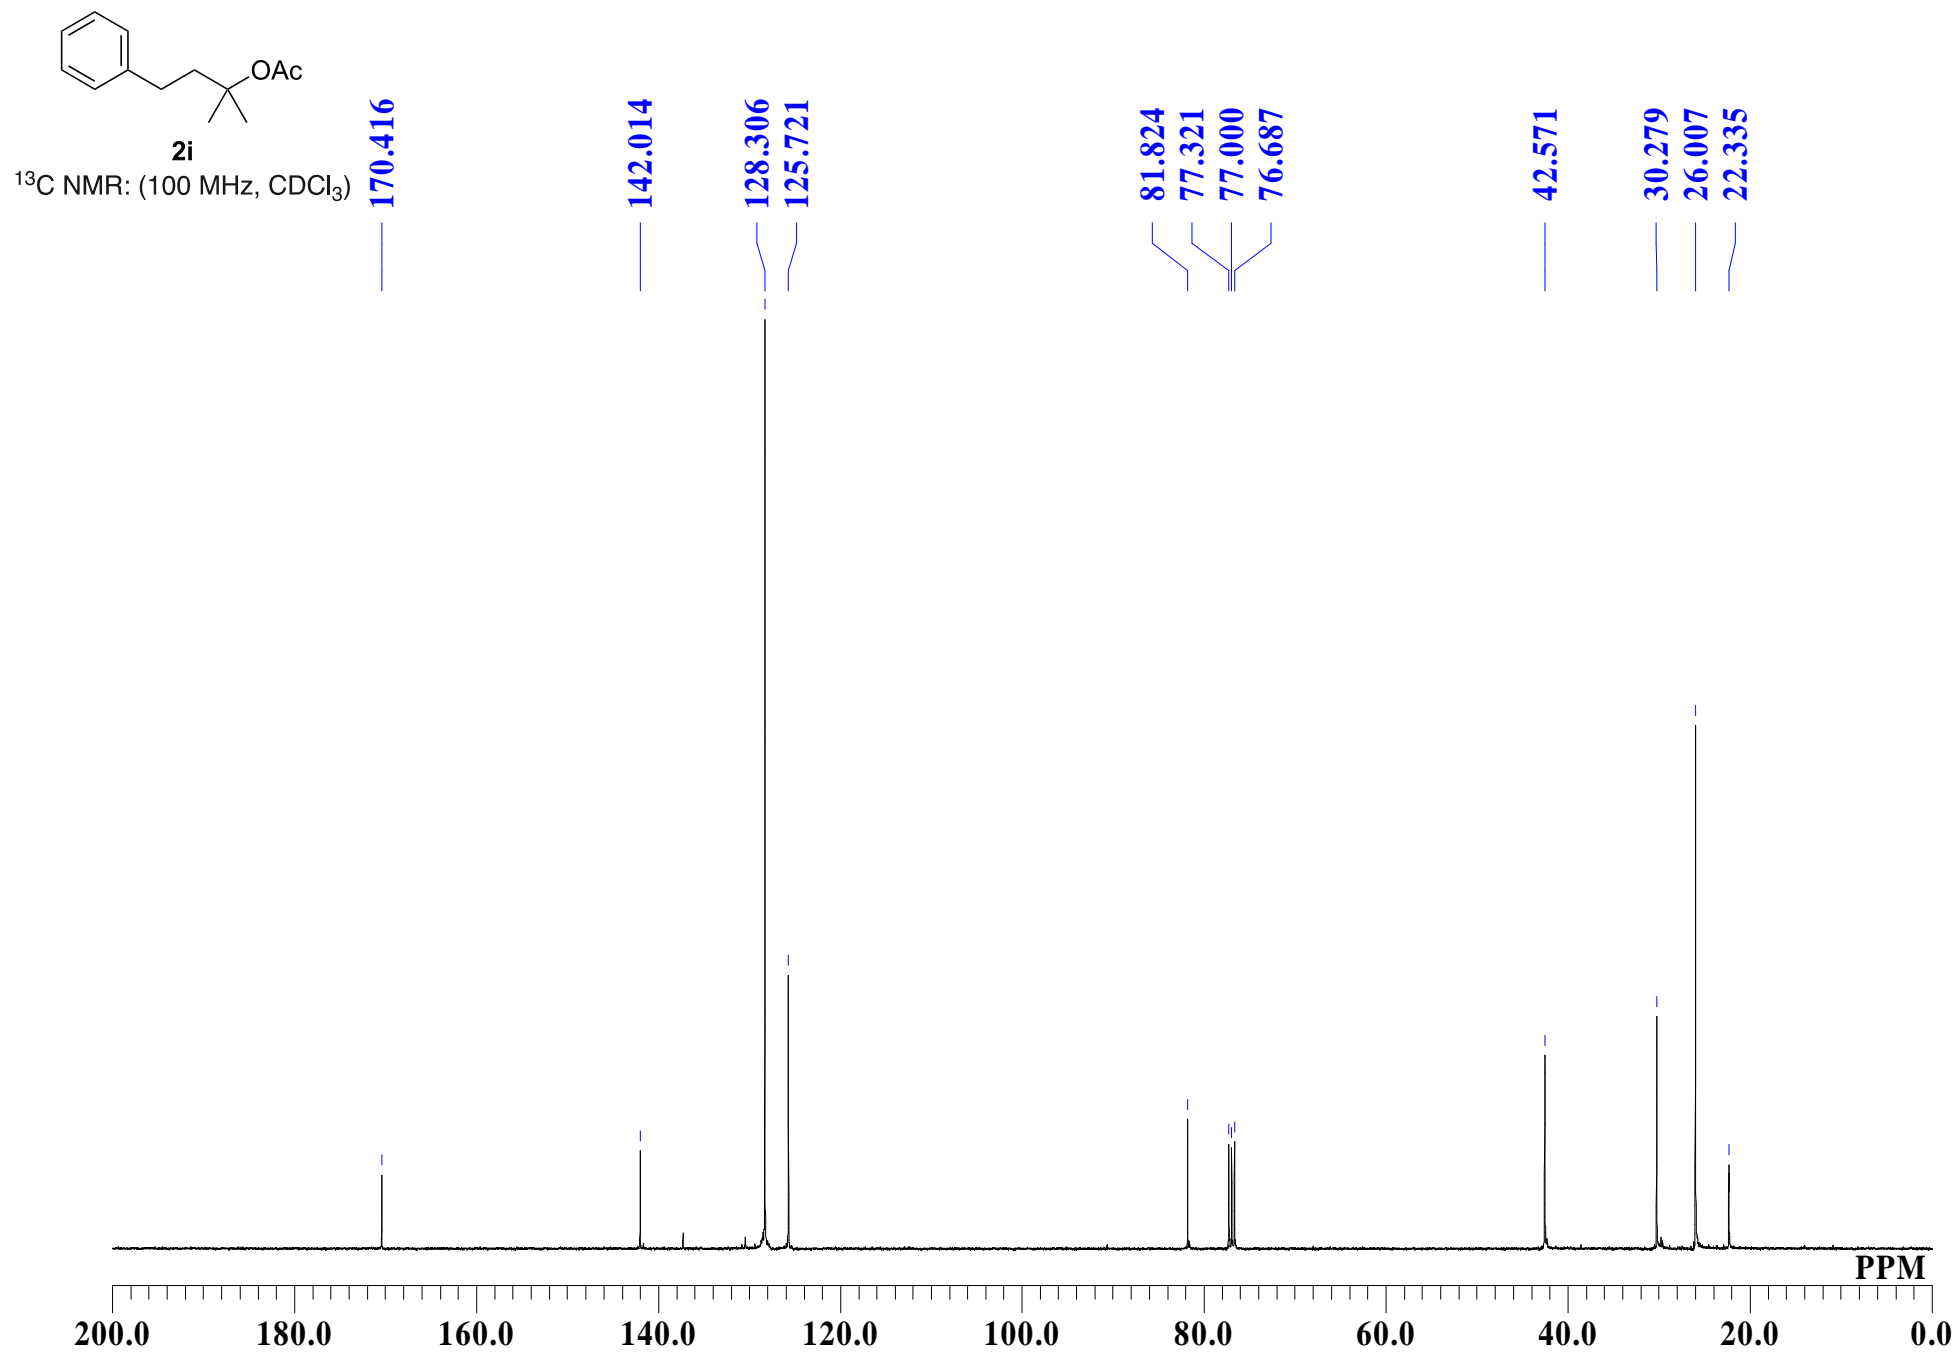

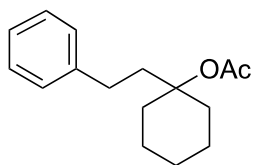

**2j**

$^1\text{H}$  NMR: (400 MHz,  $\text{CDCl}_3$ )

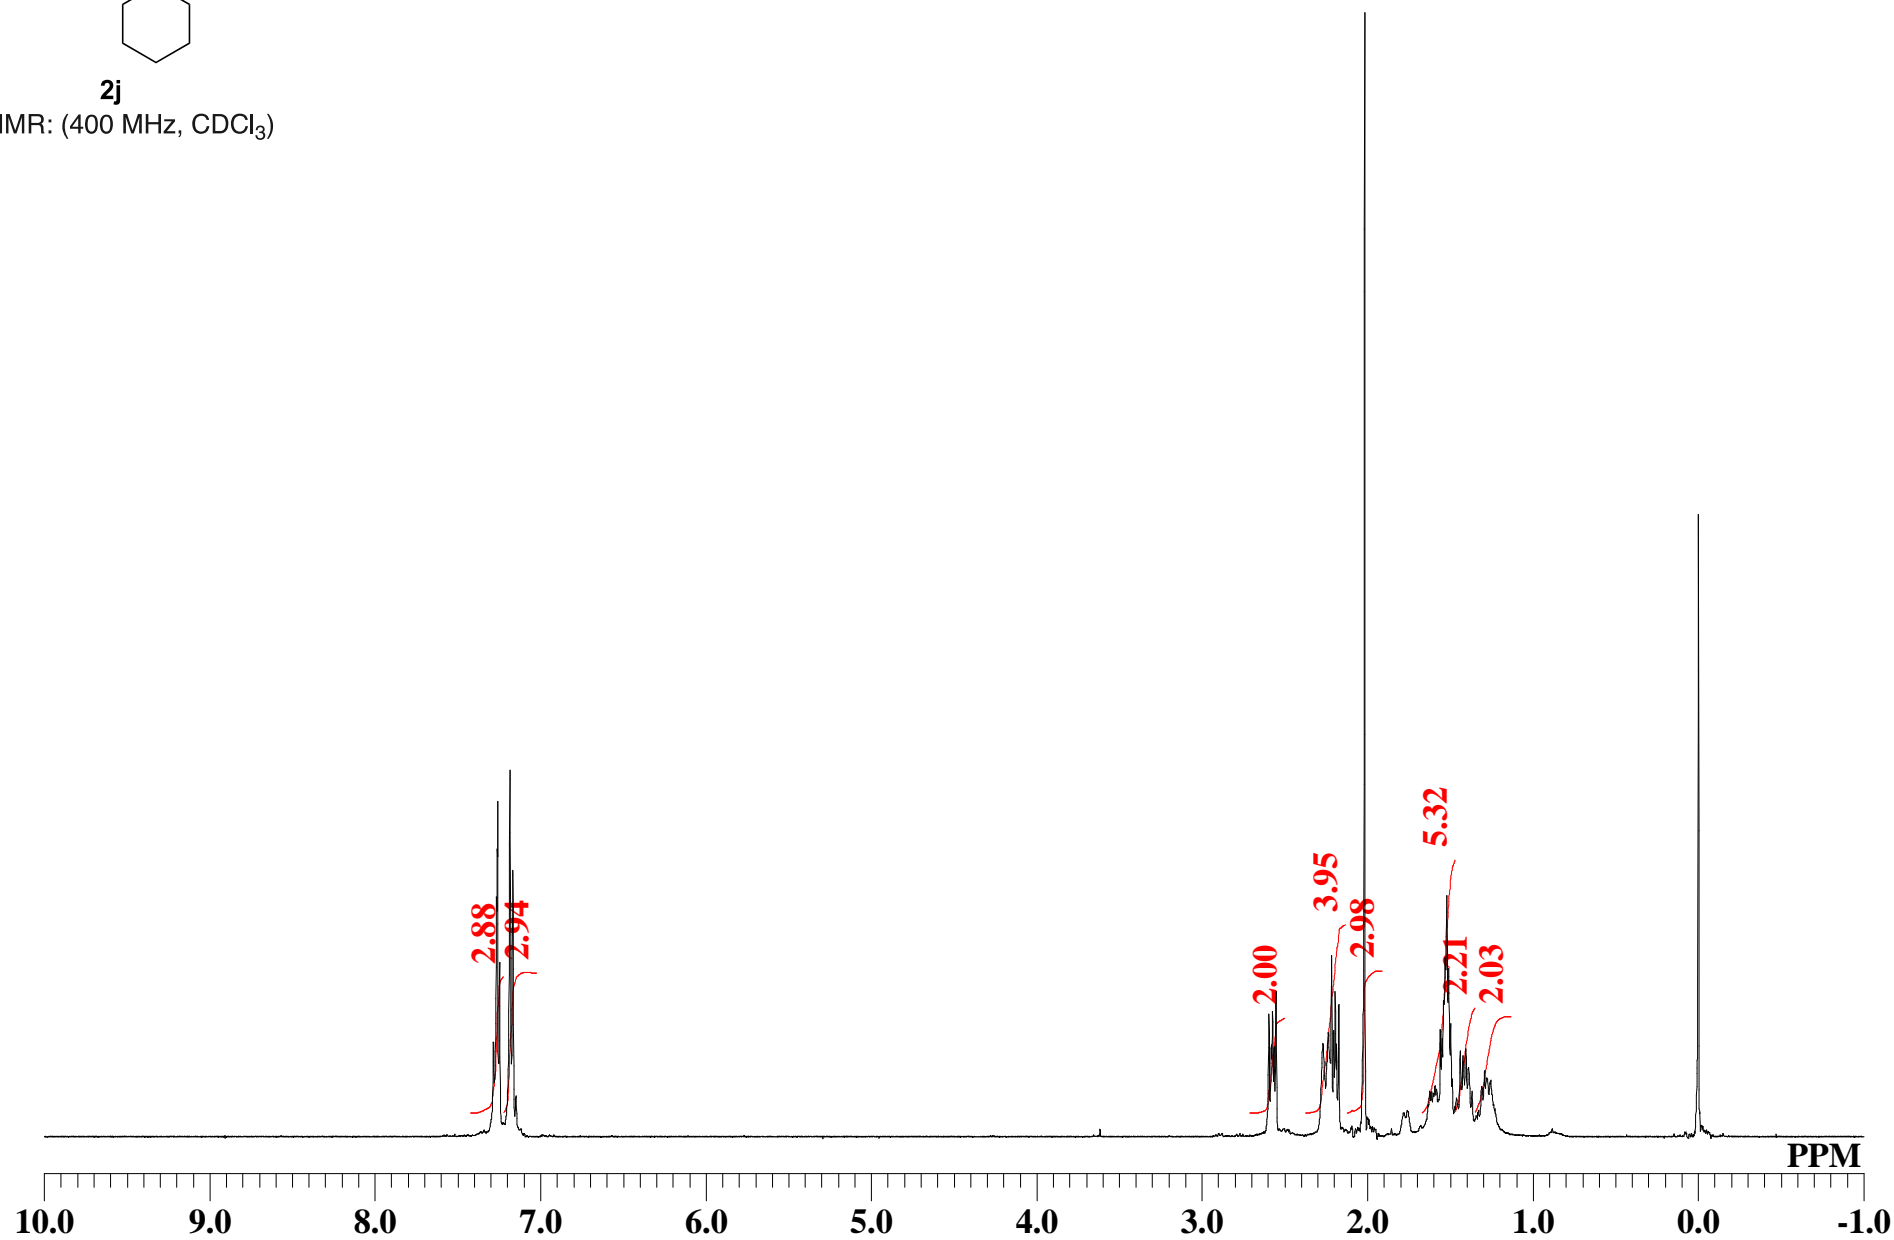

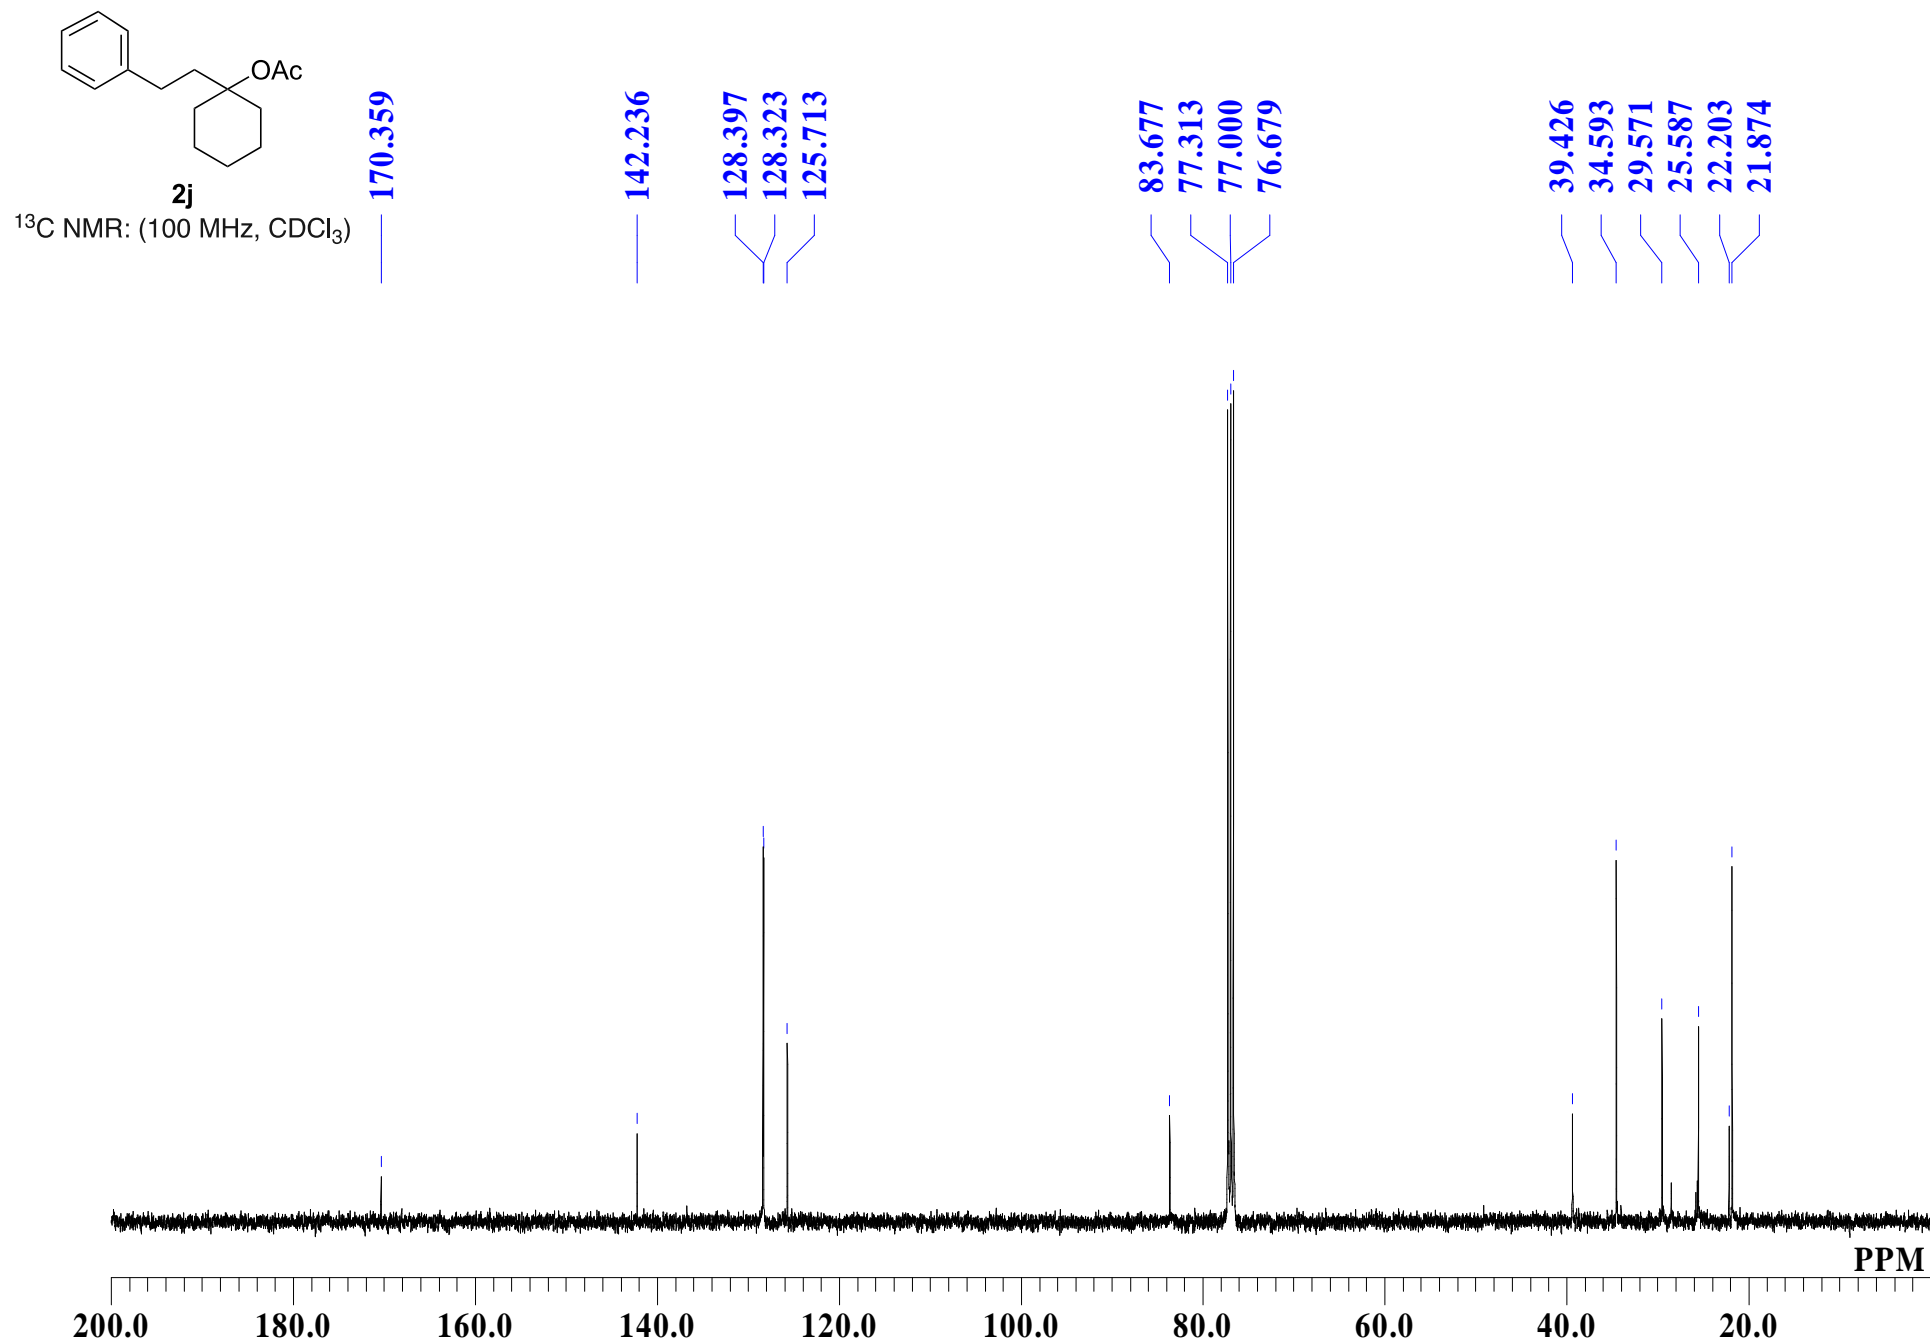

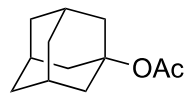

**2k**

$^1\text{H}$  NMR: (400 MHz,  $\text{CDCl}_3$ )

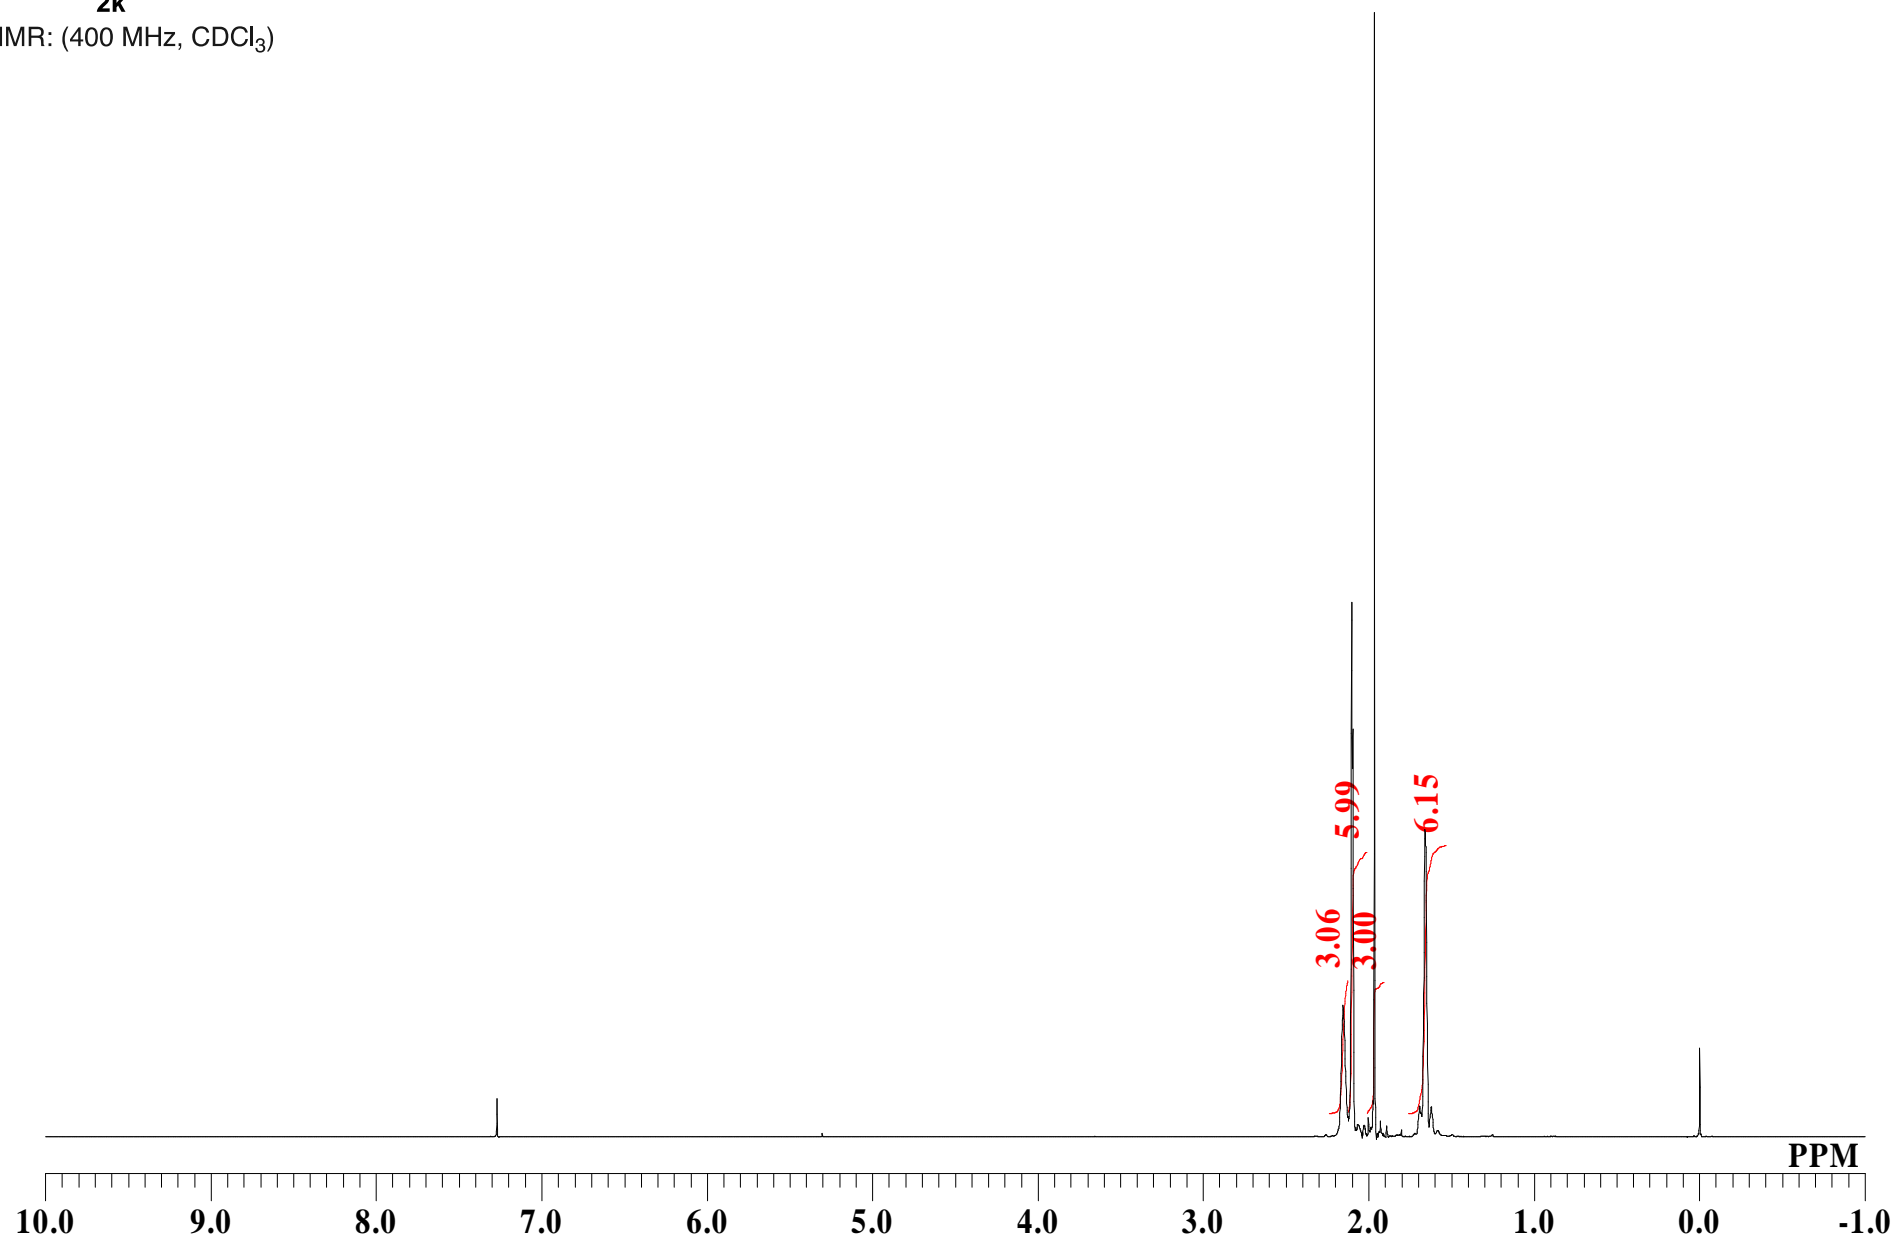



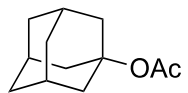

**2k**

$^{13}\text{C}$  NMR: (100 MHz,  $\text{CDCl}_3$ )

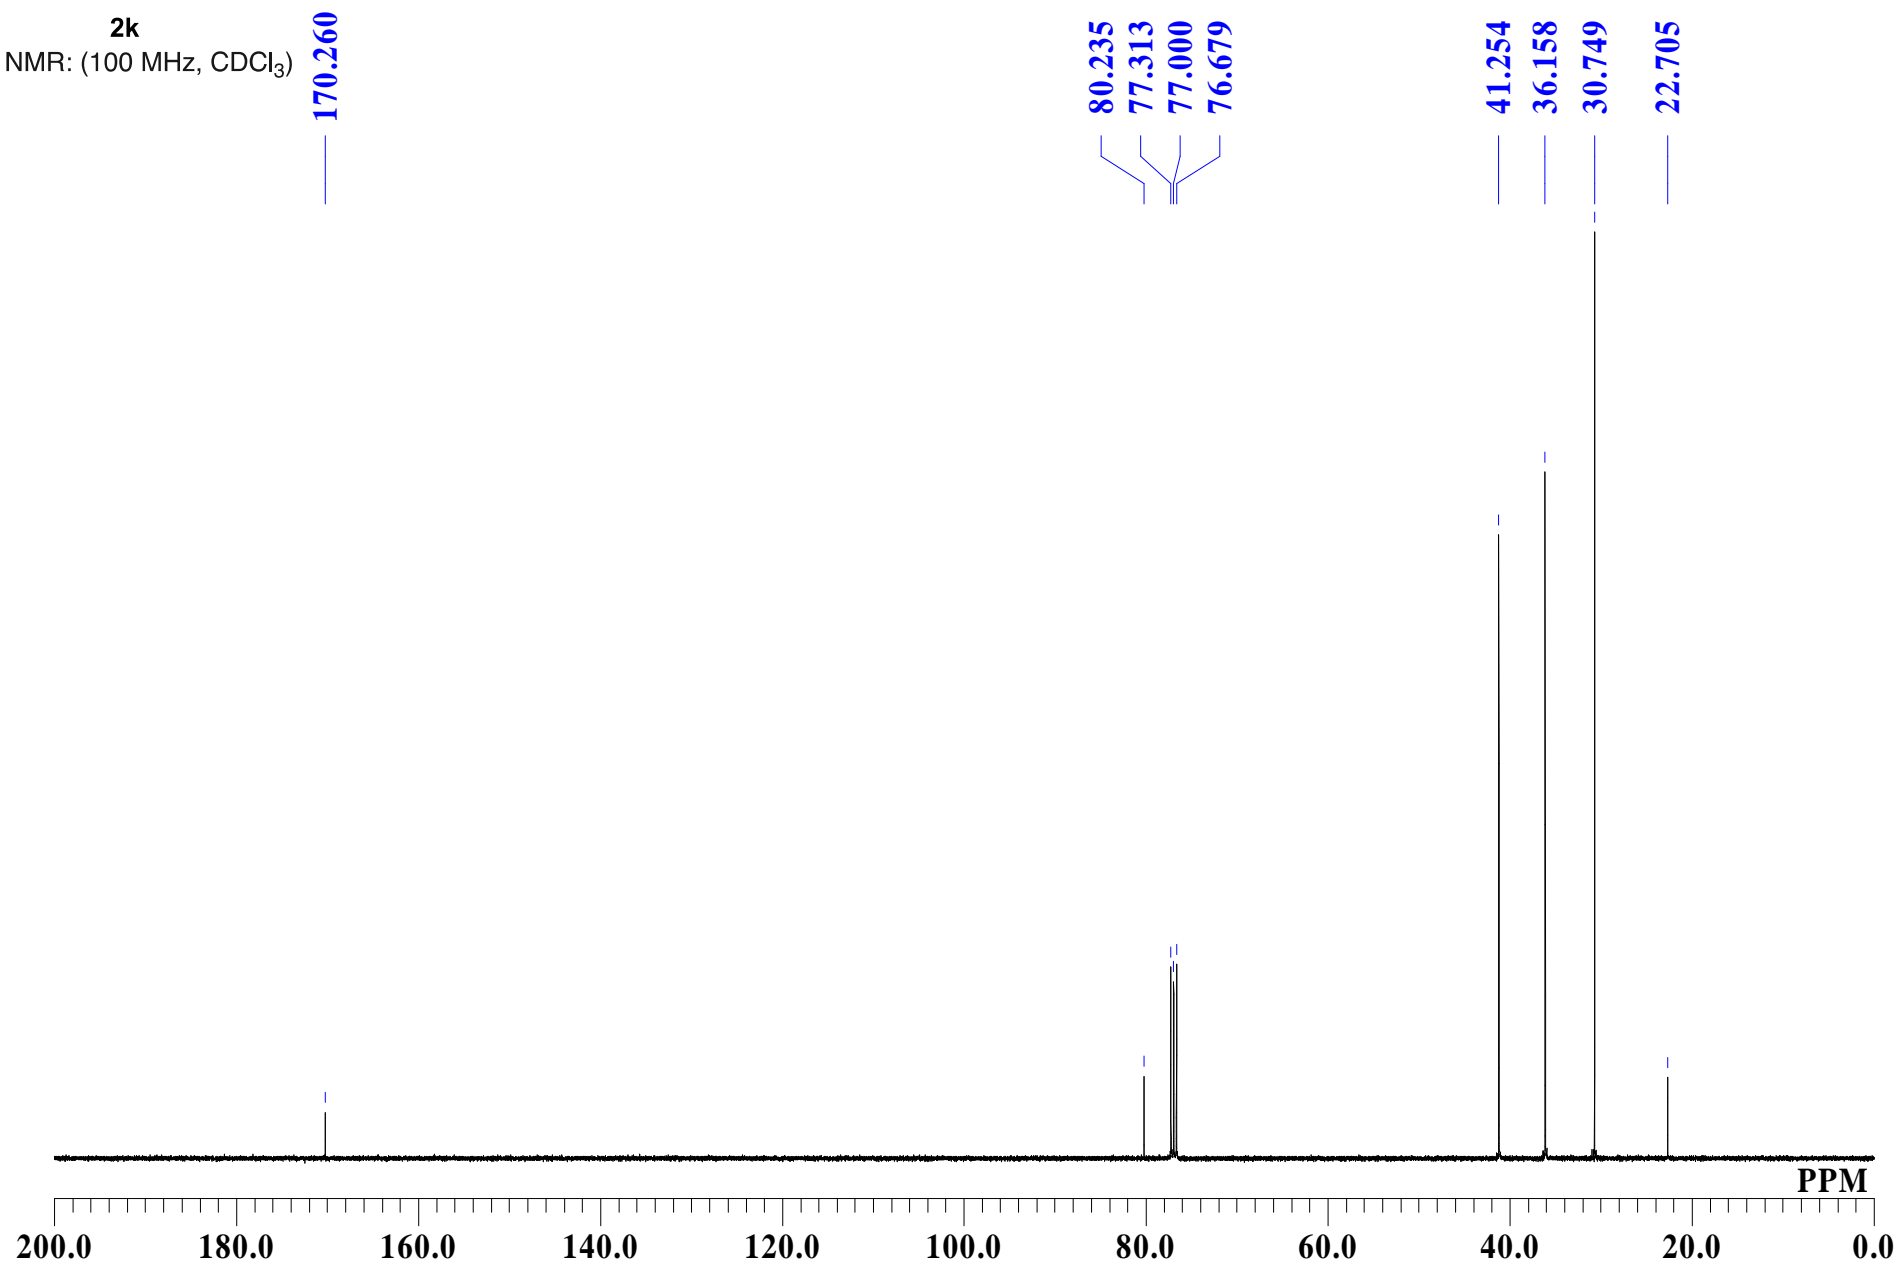

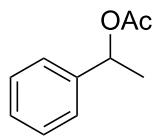

**21**

$^1\text{H}$  NMR: (400 MHz,  $\text{CDCl}_3$ )

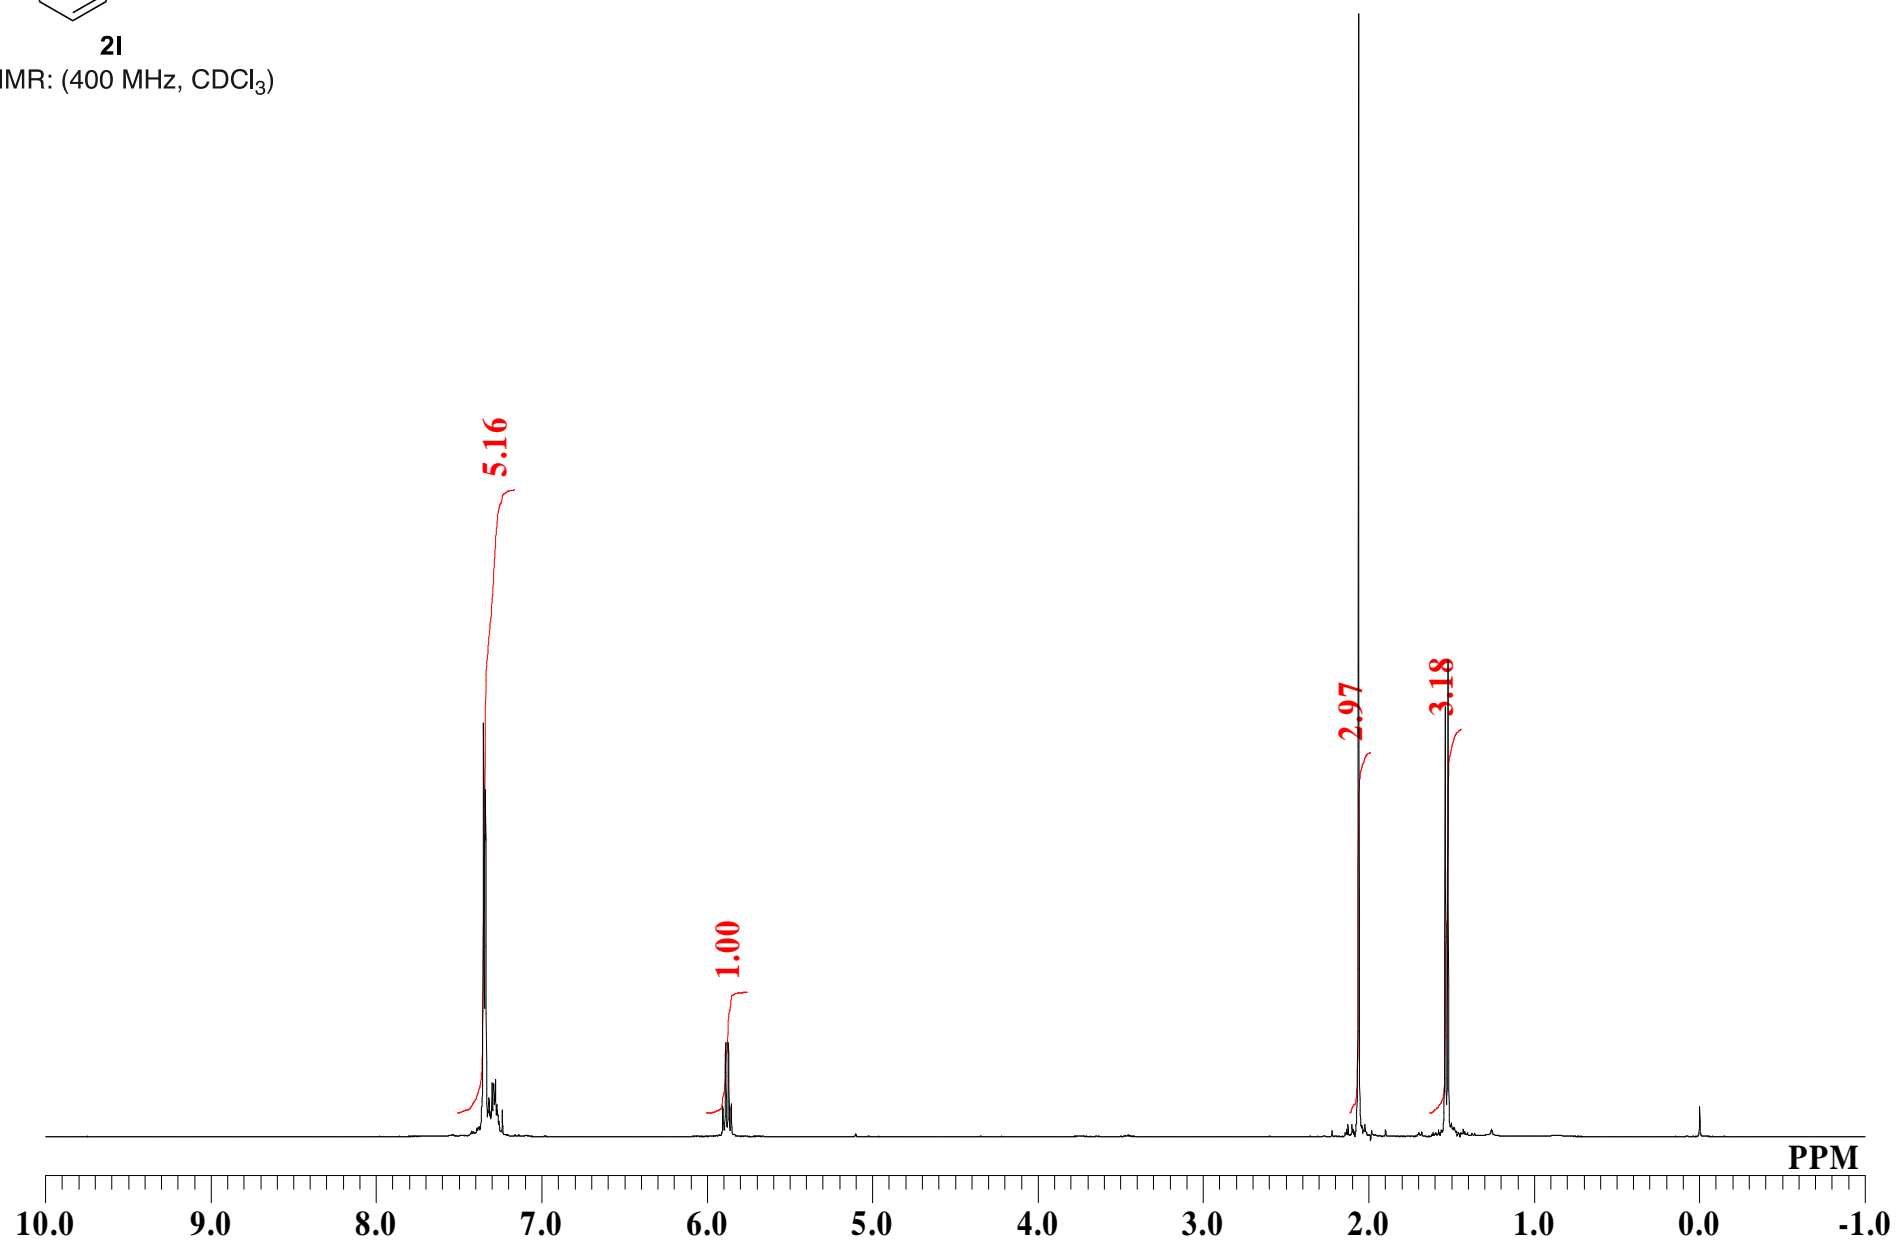

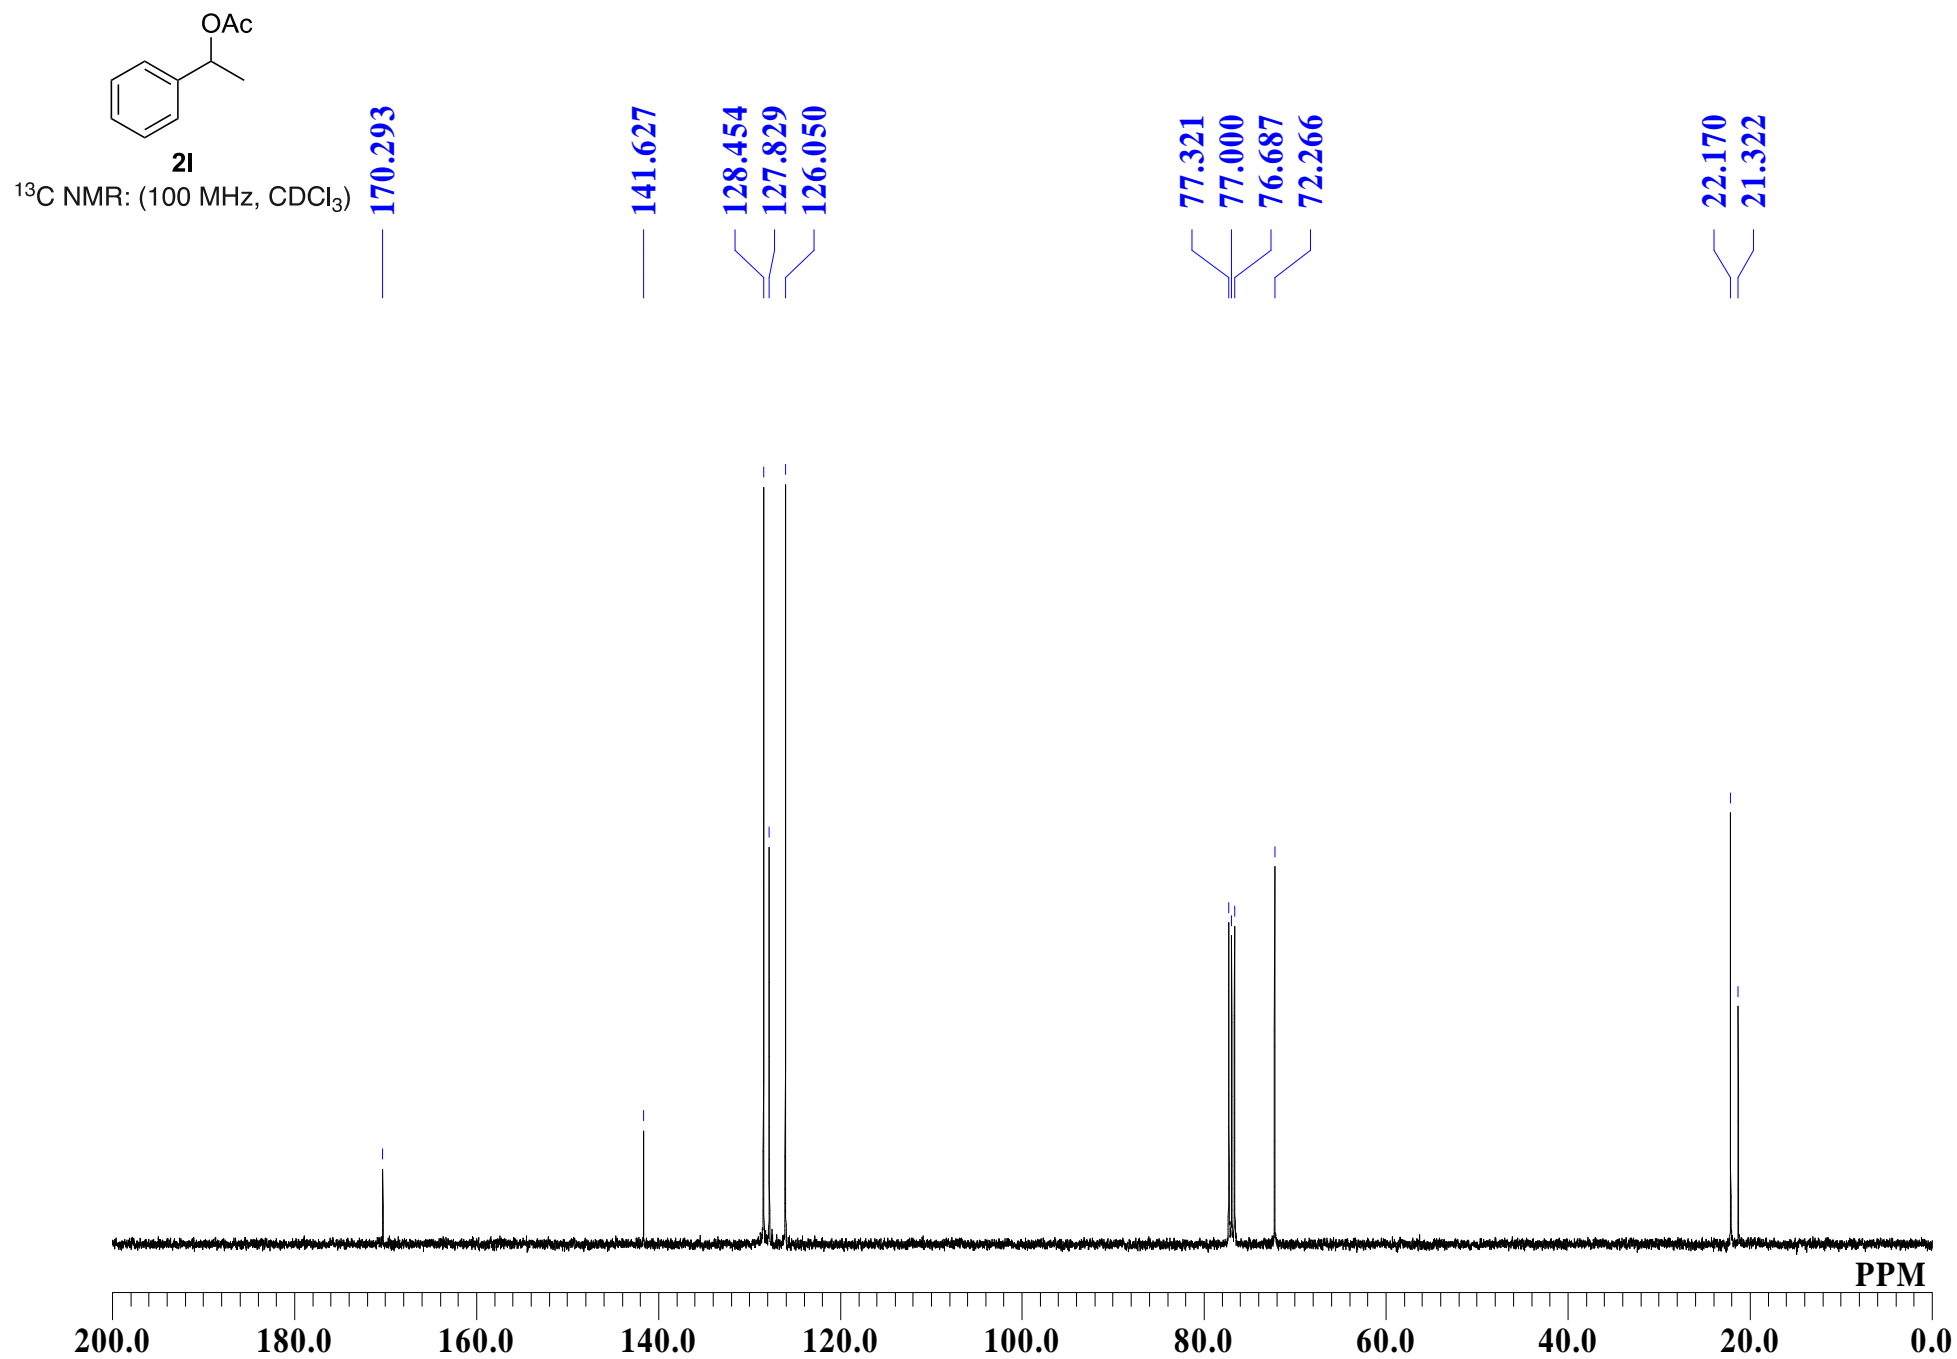

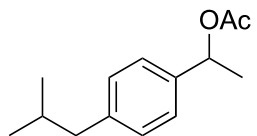

**2m**

$^1\text{H}$  NMR: (400 MHz,  $\text{CDCl}_3$ )

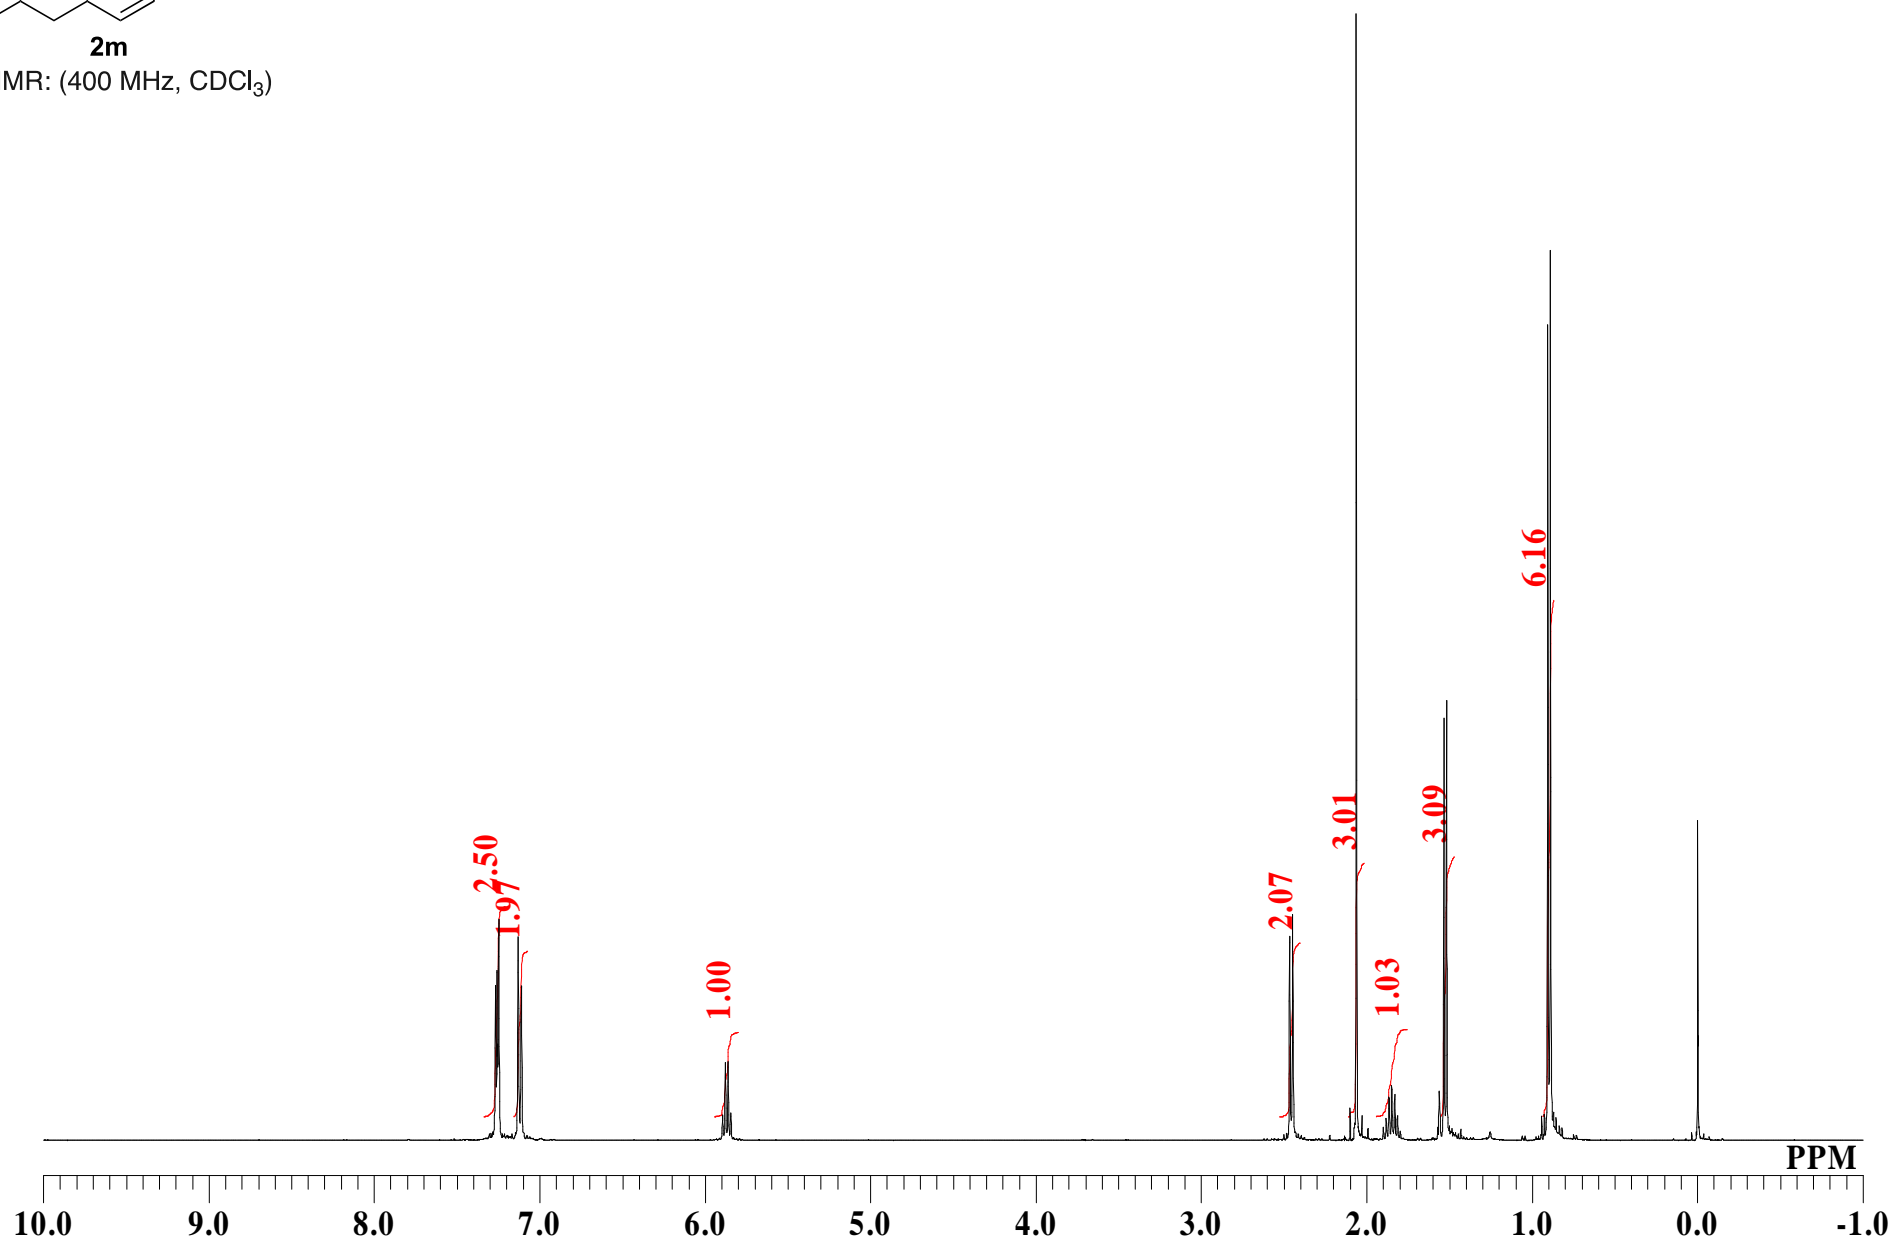

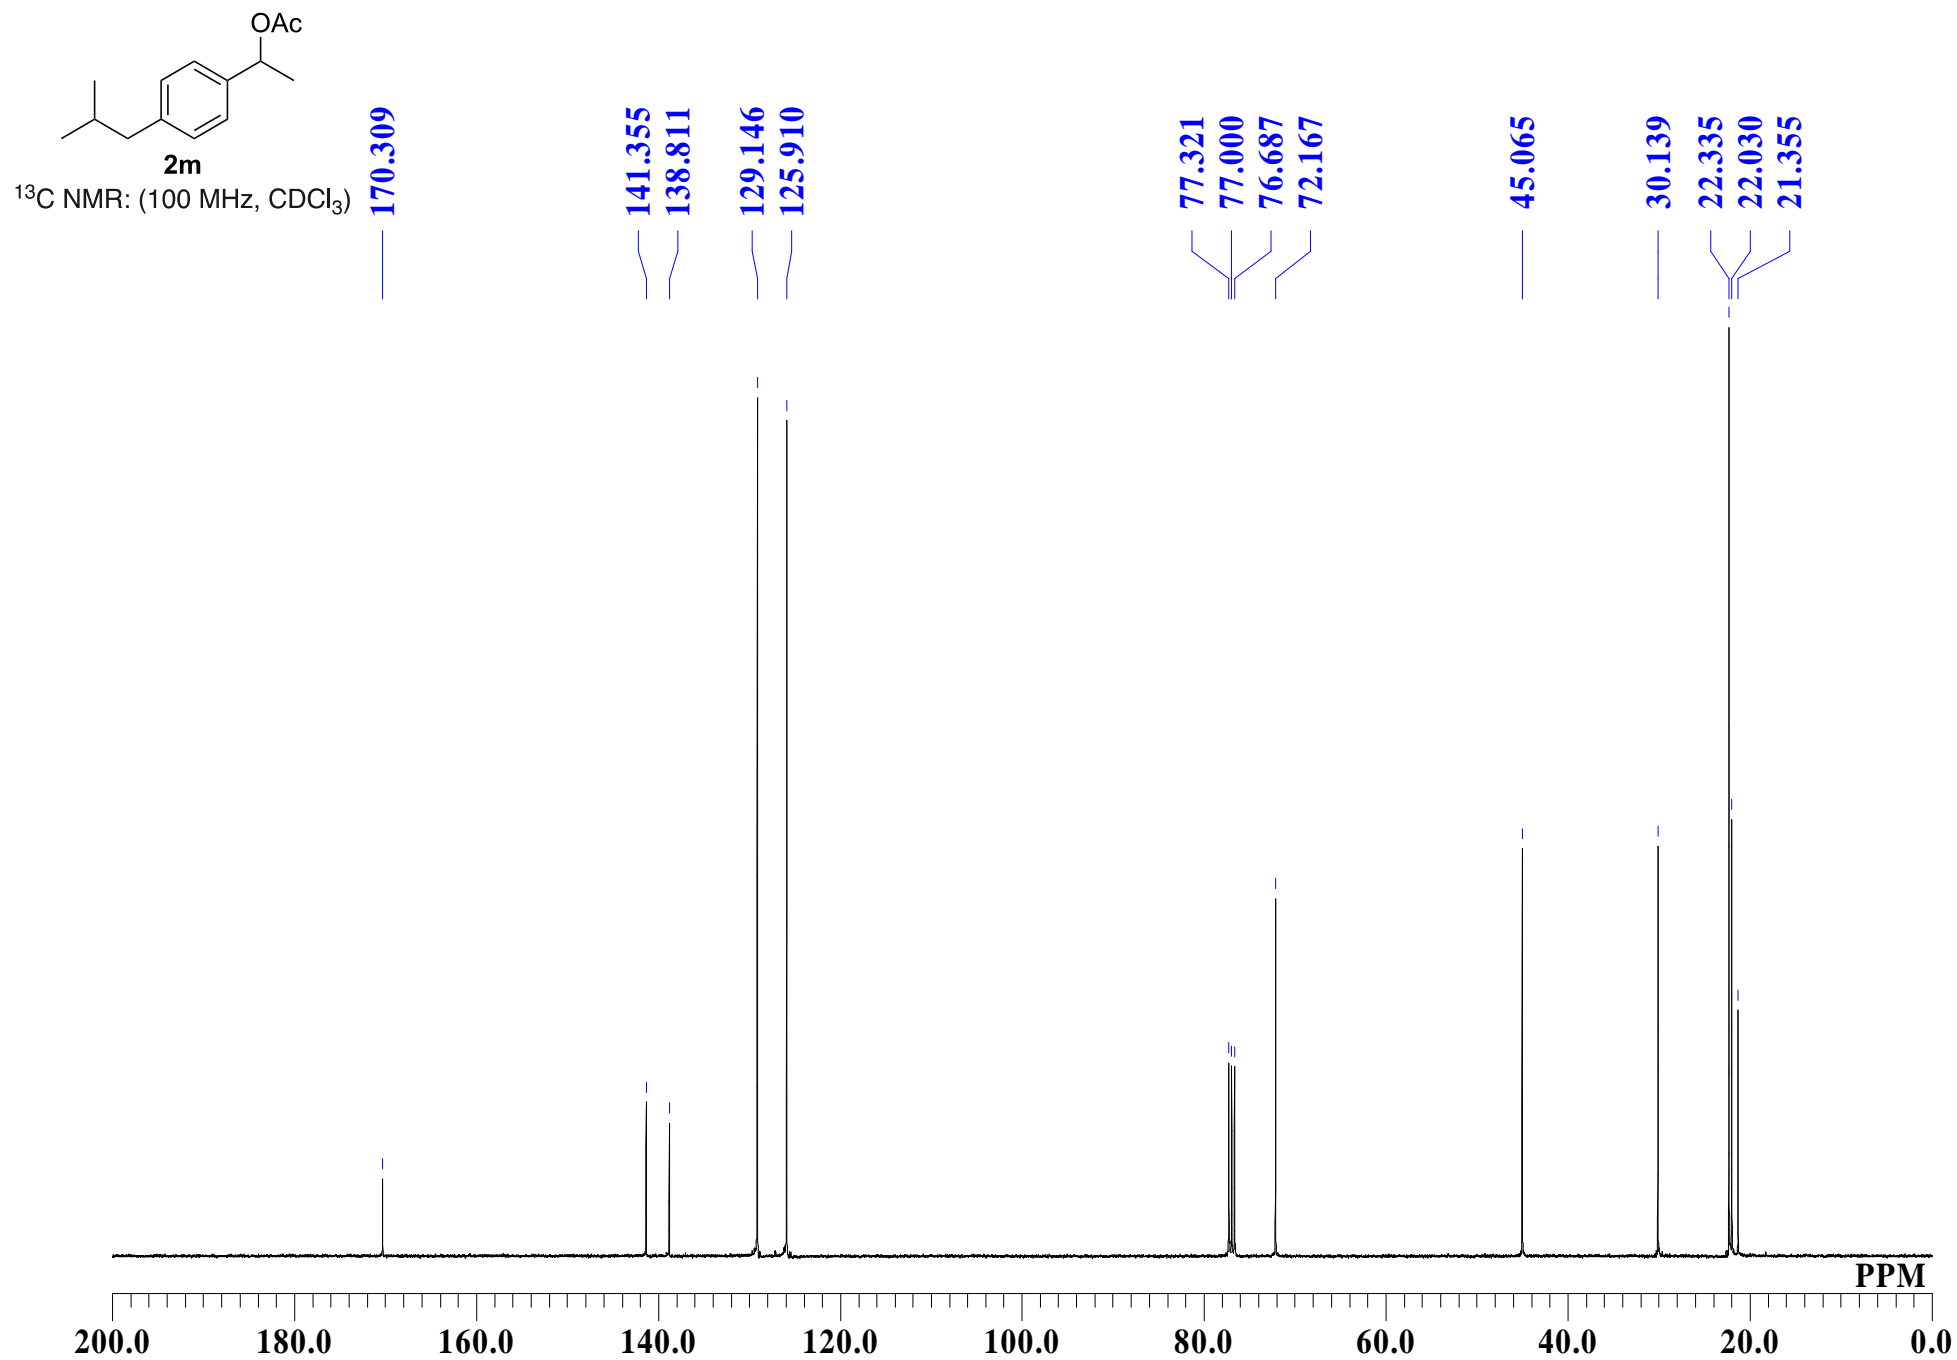

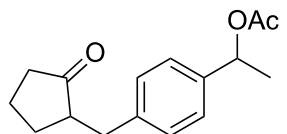

**2n**

$^1\text{H}$  NMR: (400 MHz,  $\text{CDCl}_3$ )

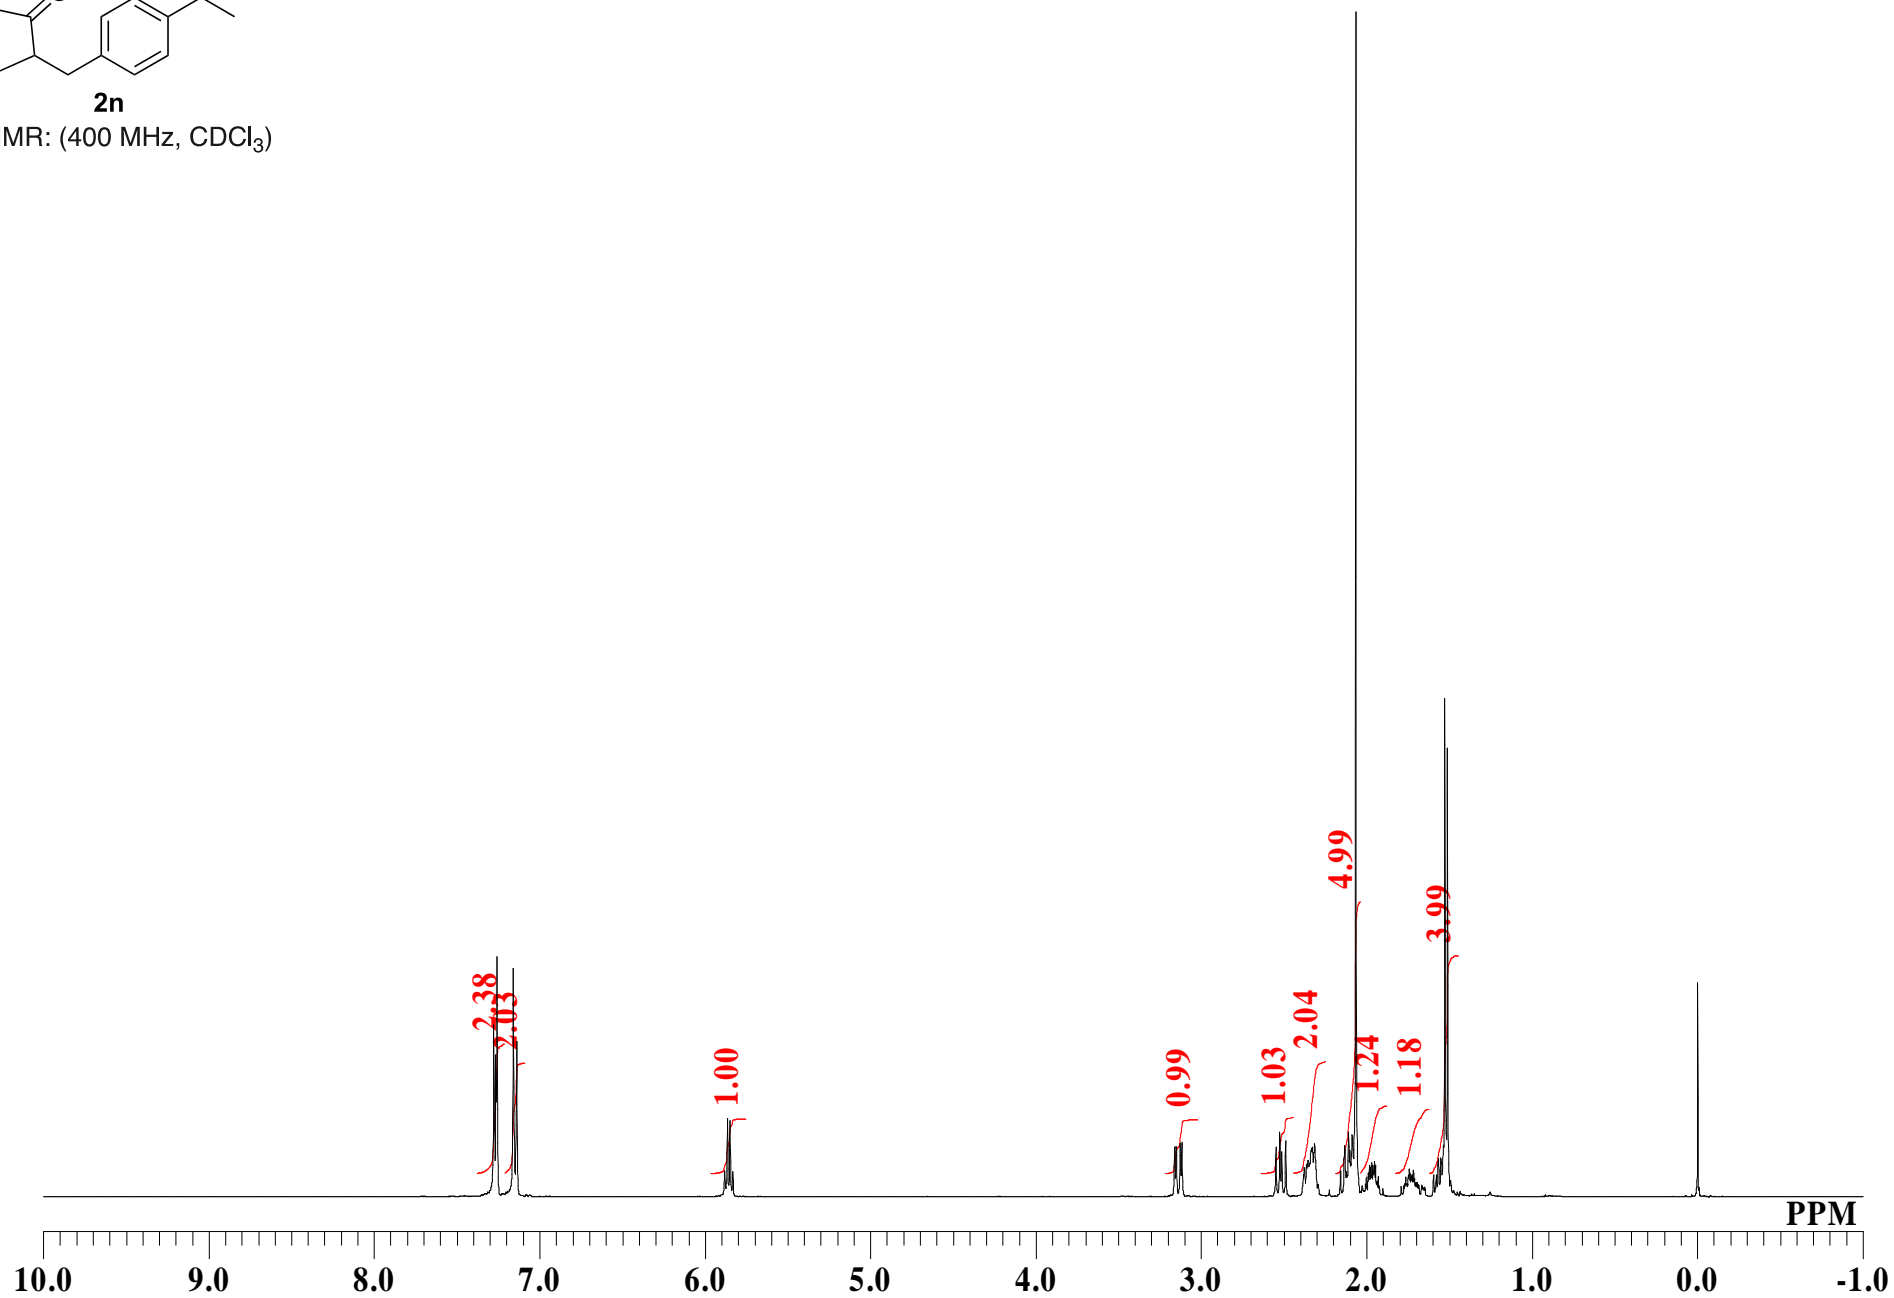

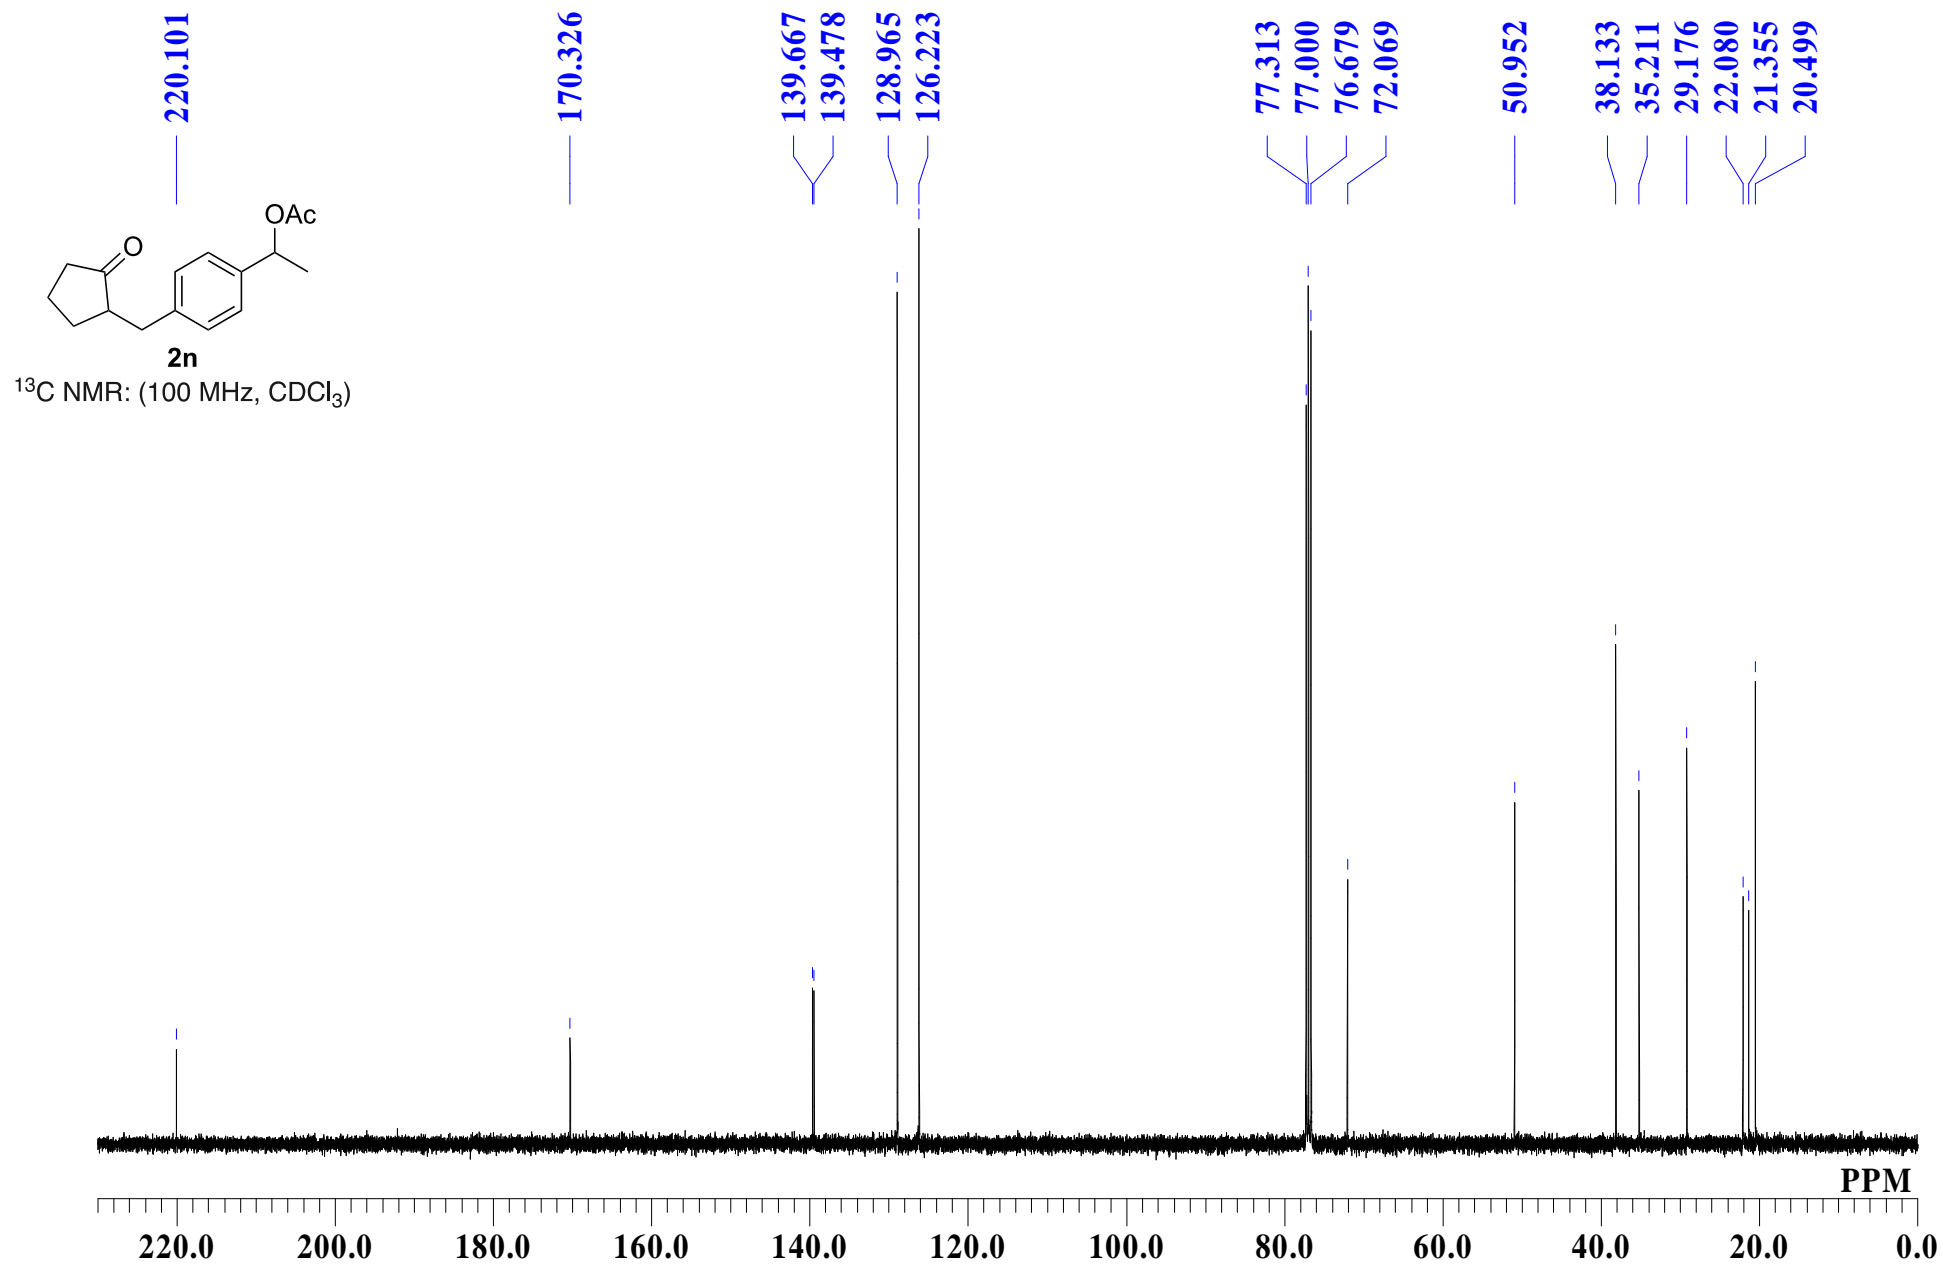

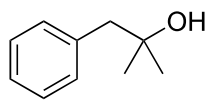

**3c**

$^1\text{H}$  NMR: (400 MHz,  $\text{CDCl}_3$ )

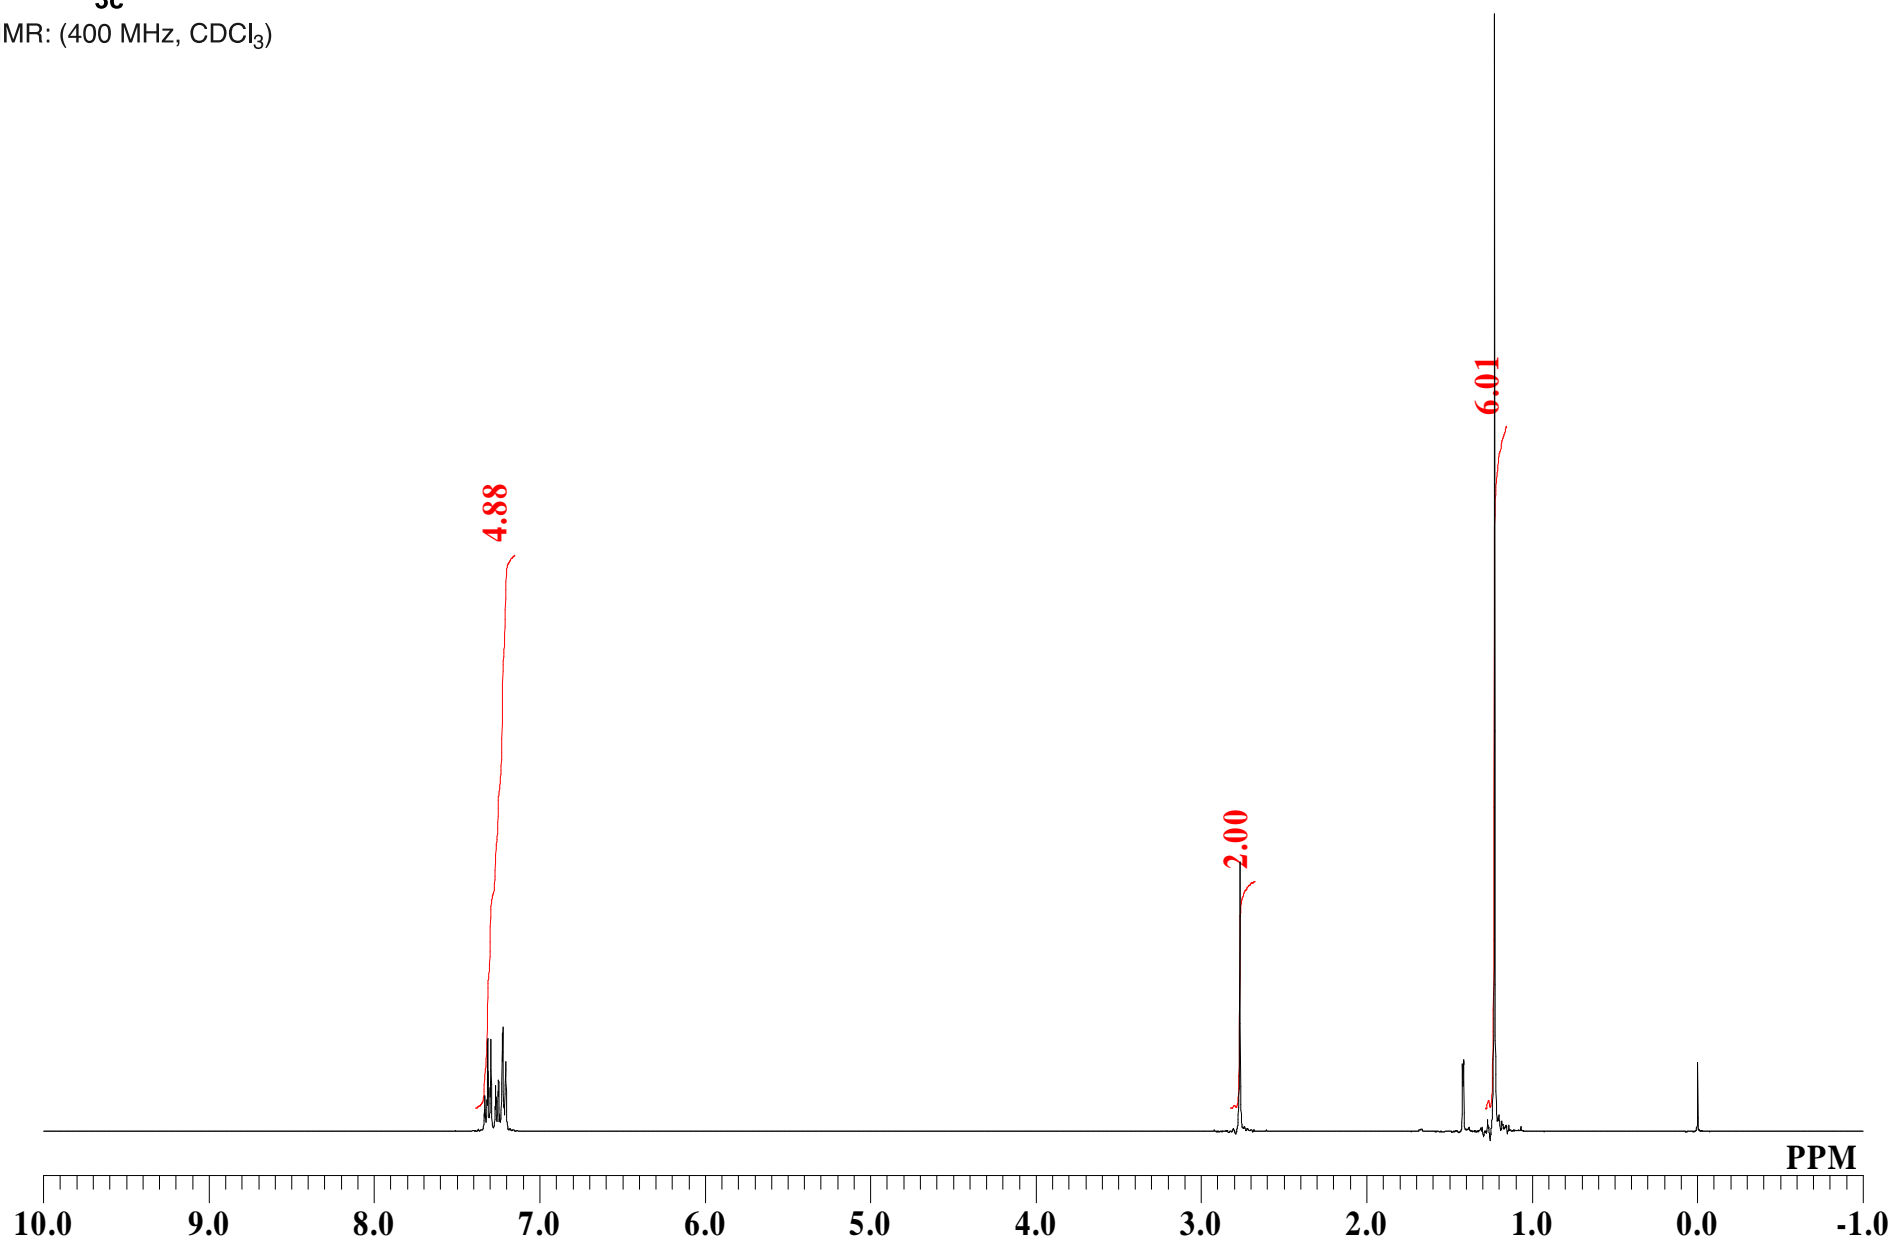



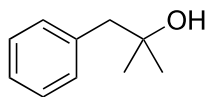

**3c**

$^{13}\text{C}$  NMR: (100 MHz,  $\text{CDCl}_3$ )

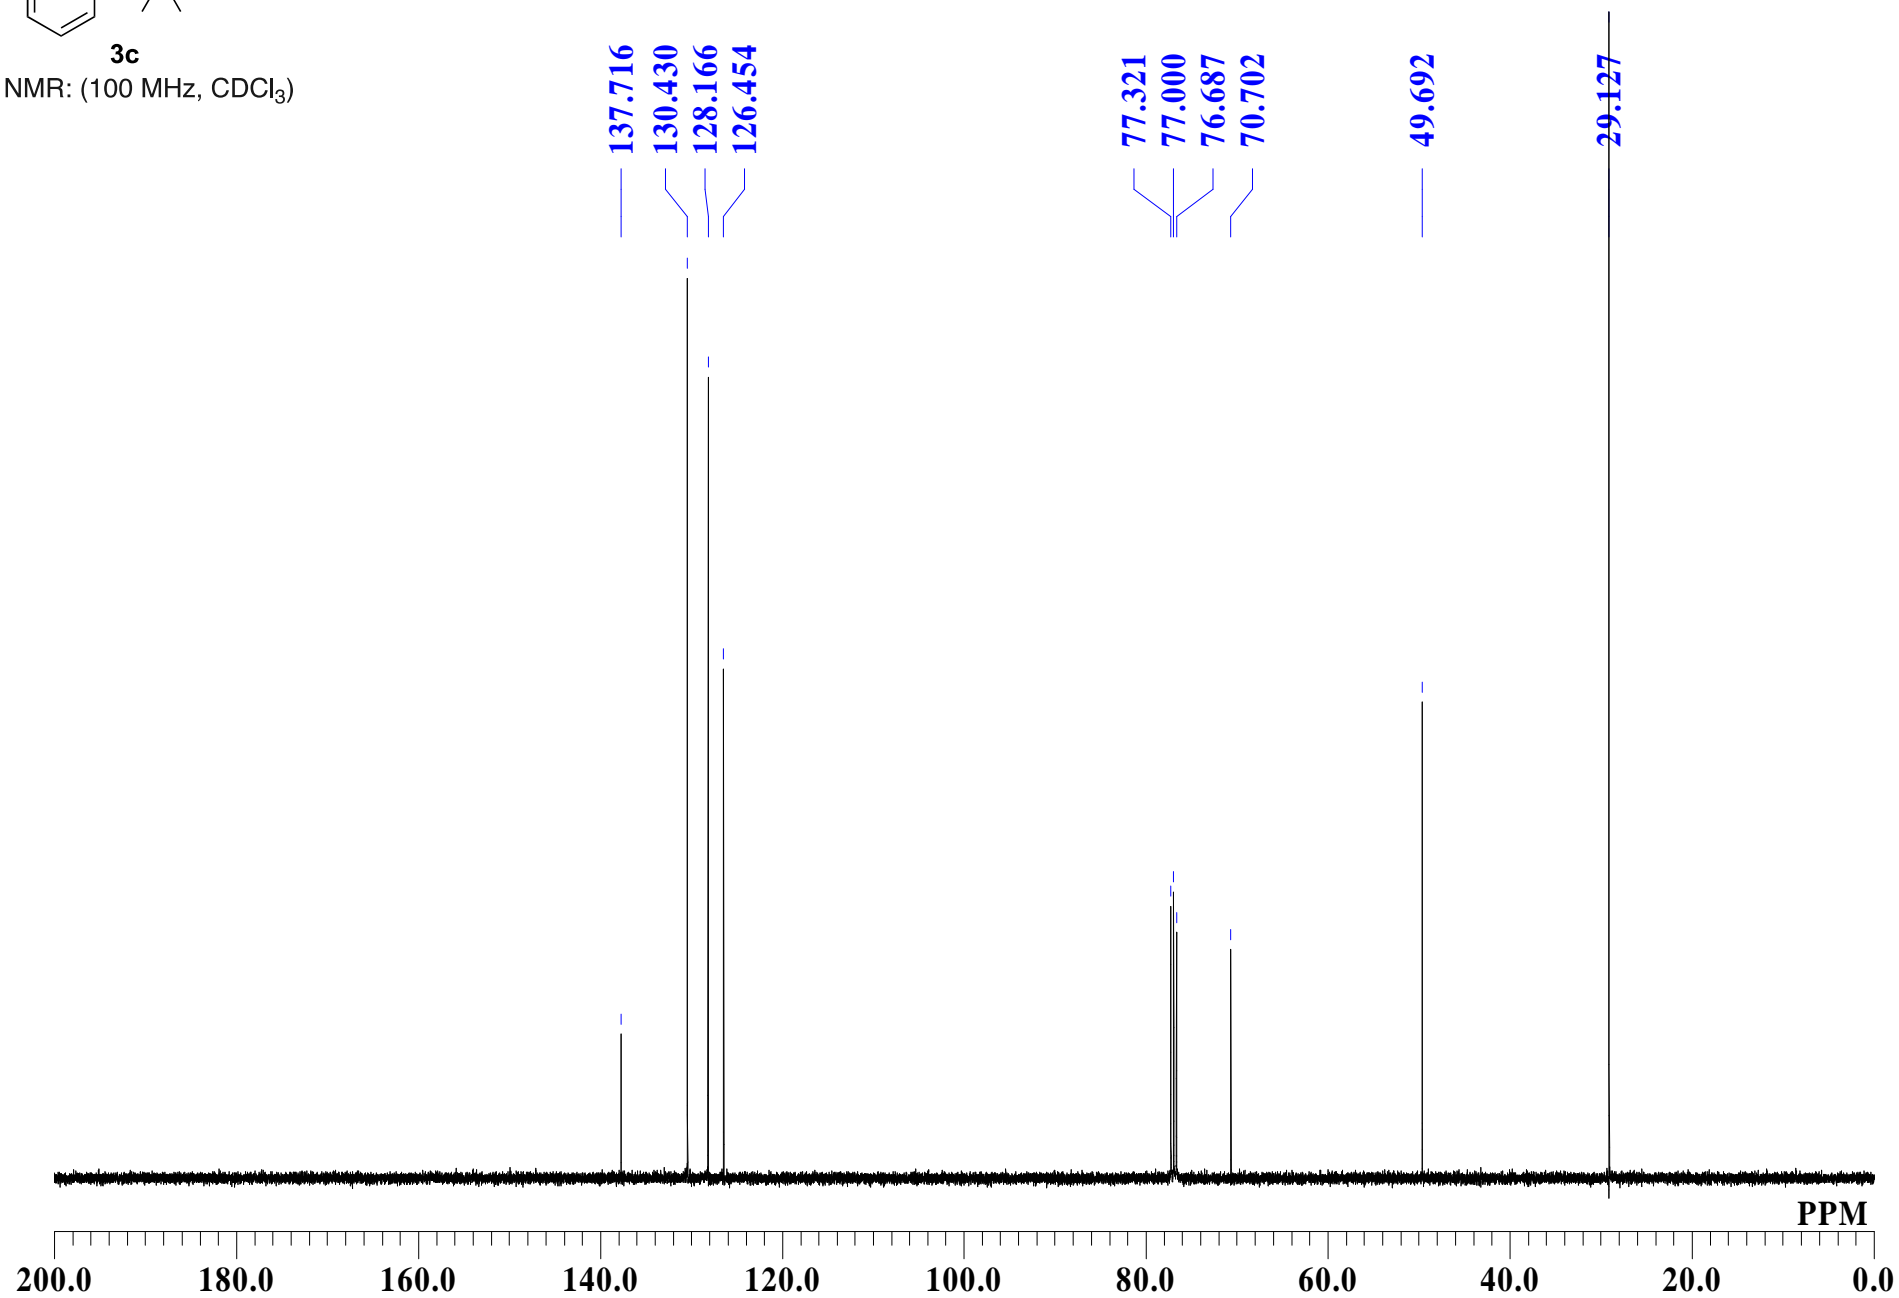

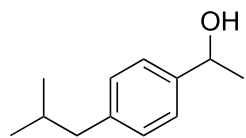

**3m**

$^1\text{H}$  NMR: (400 MHz,  $\text{CDCl}_3$ )

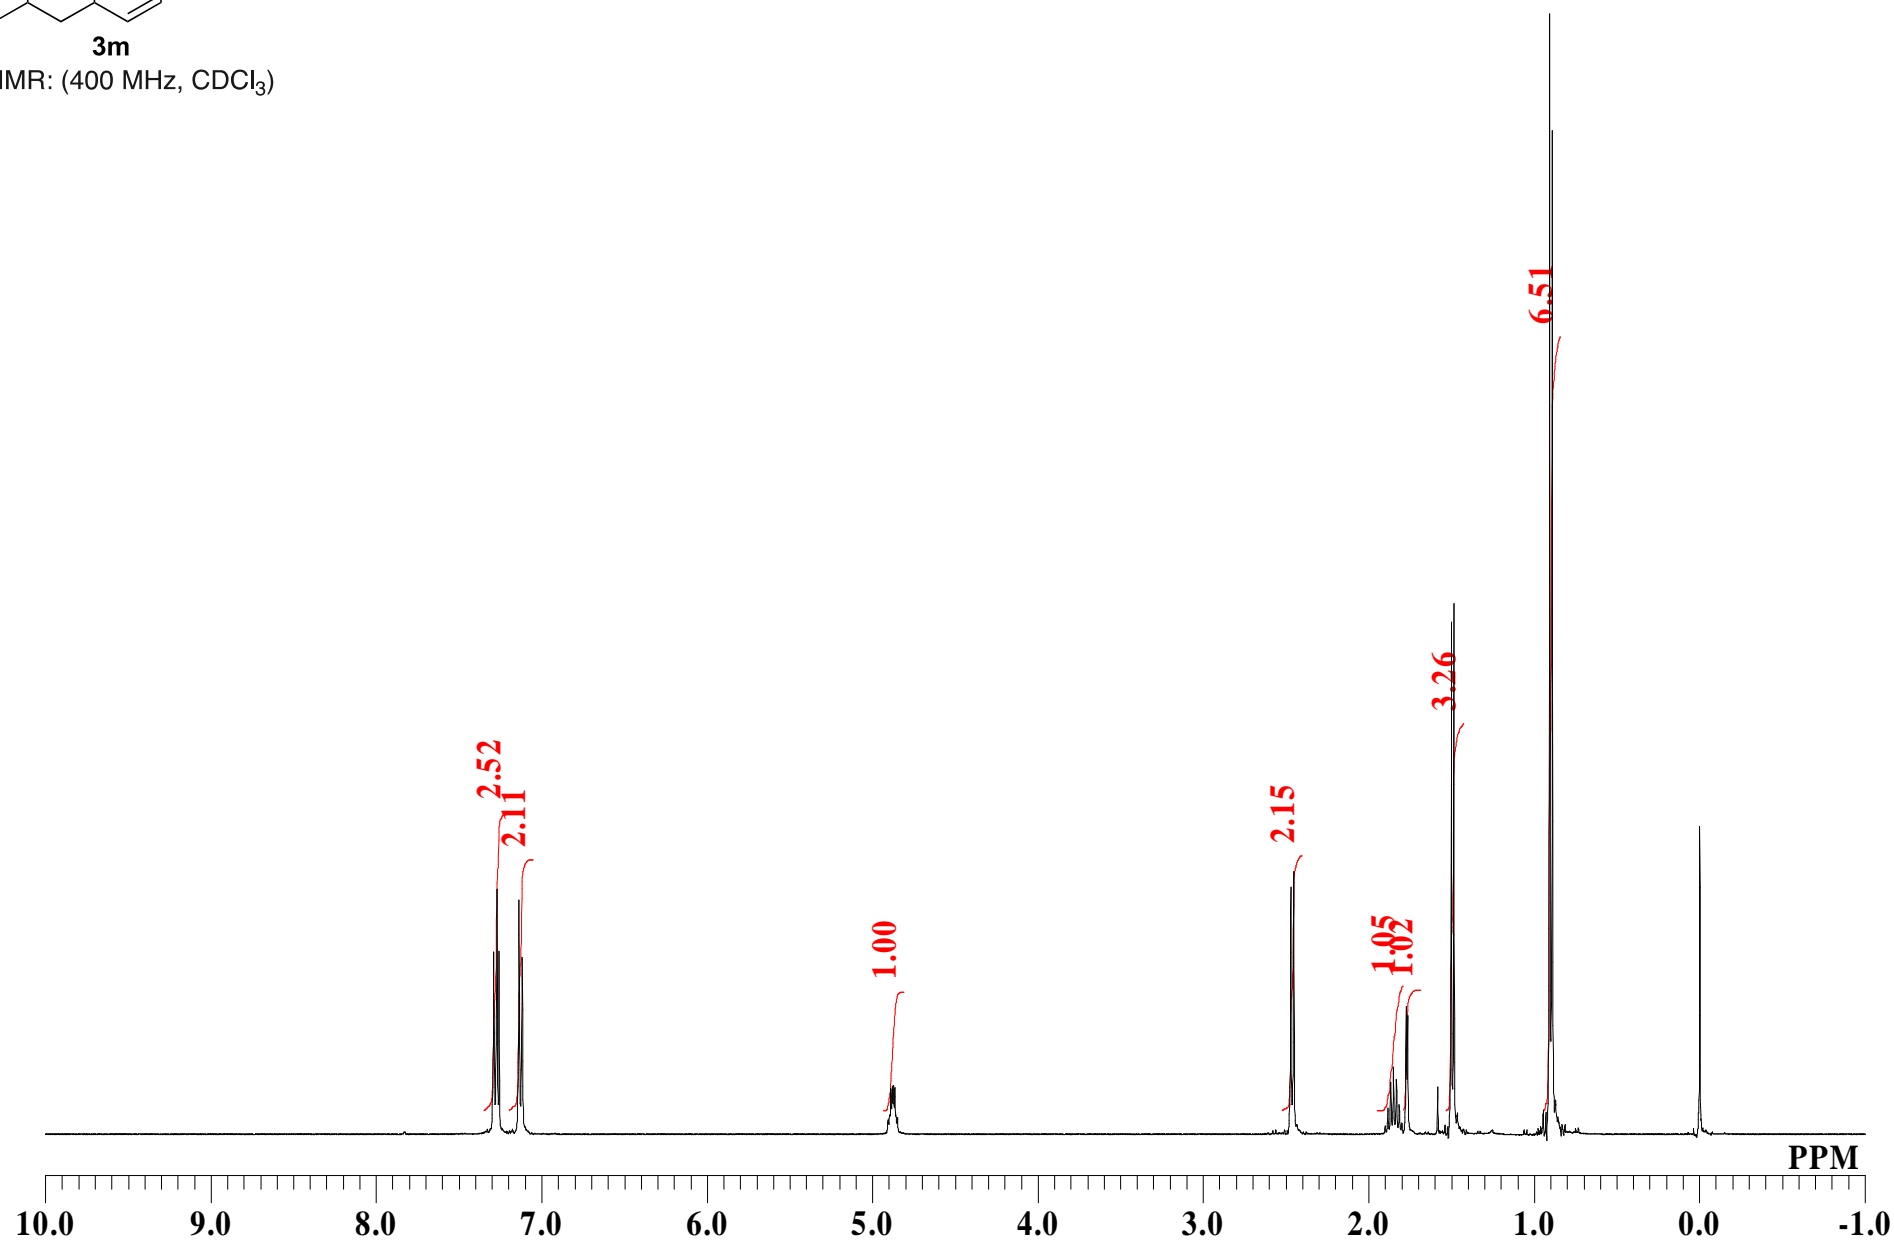

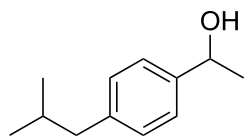

**3m**

$^{13}\text{C}$  NMR: (100 MHz,  $\text{CDCl}_3$ )

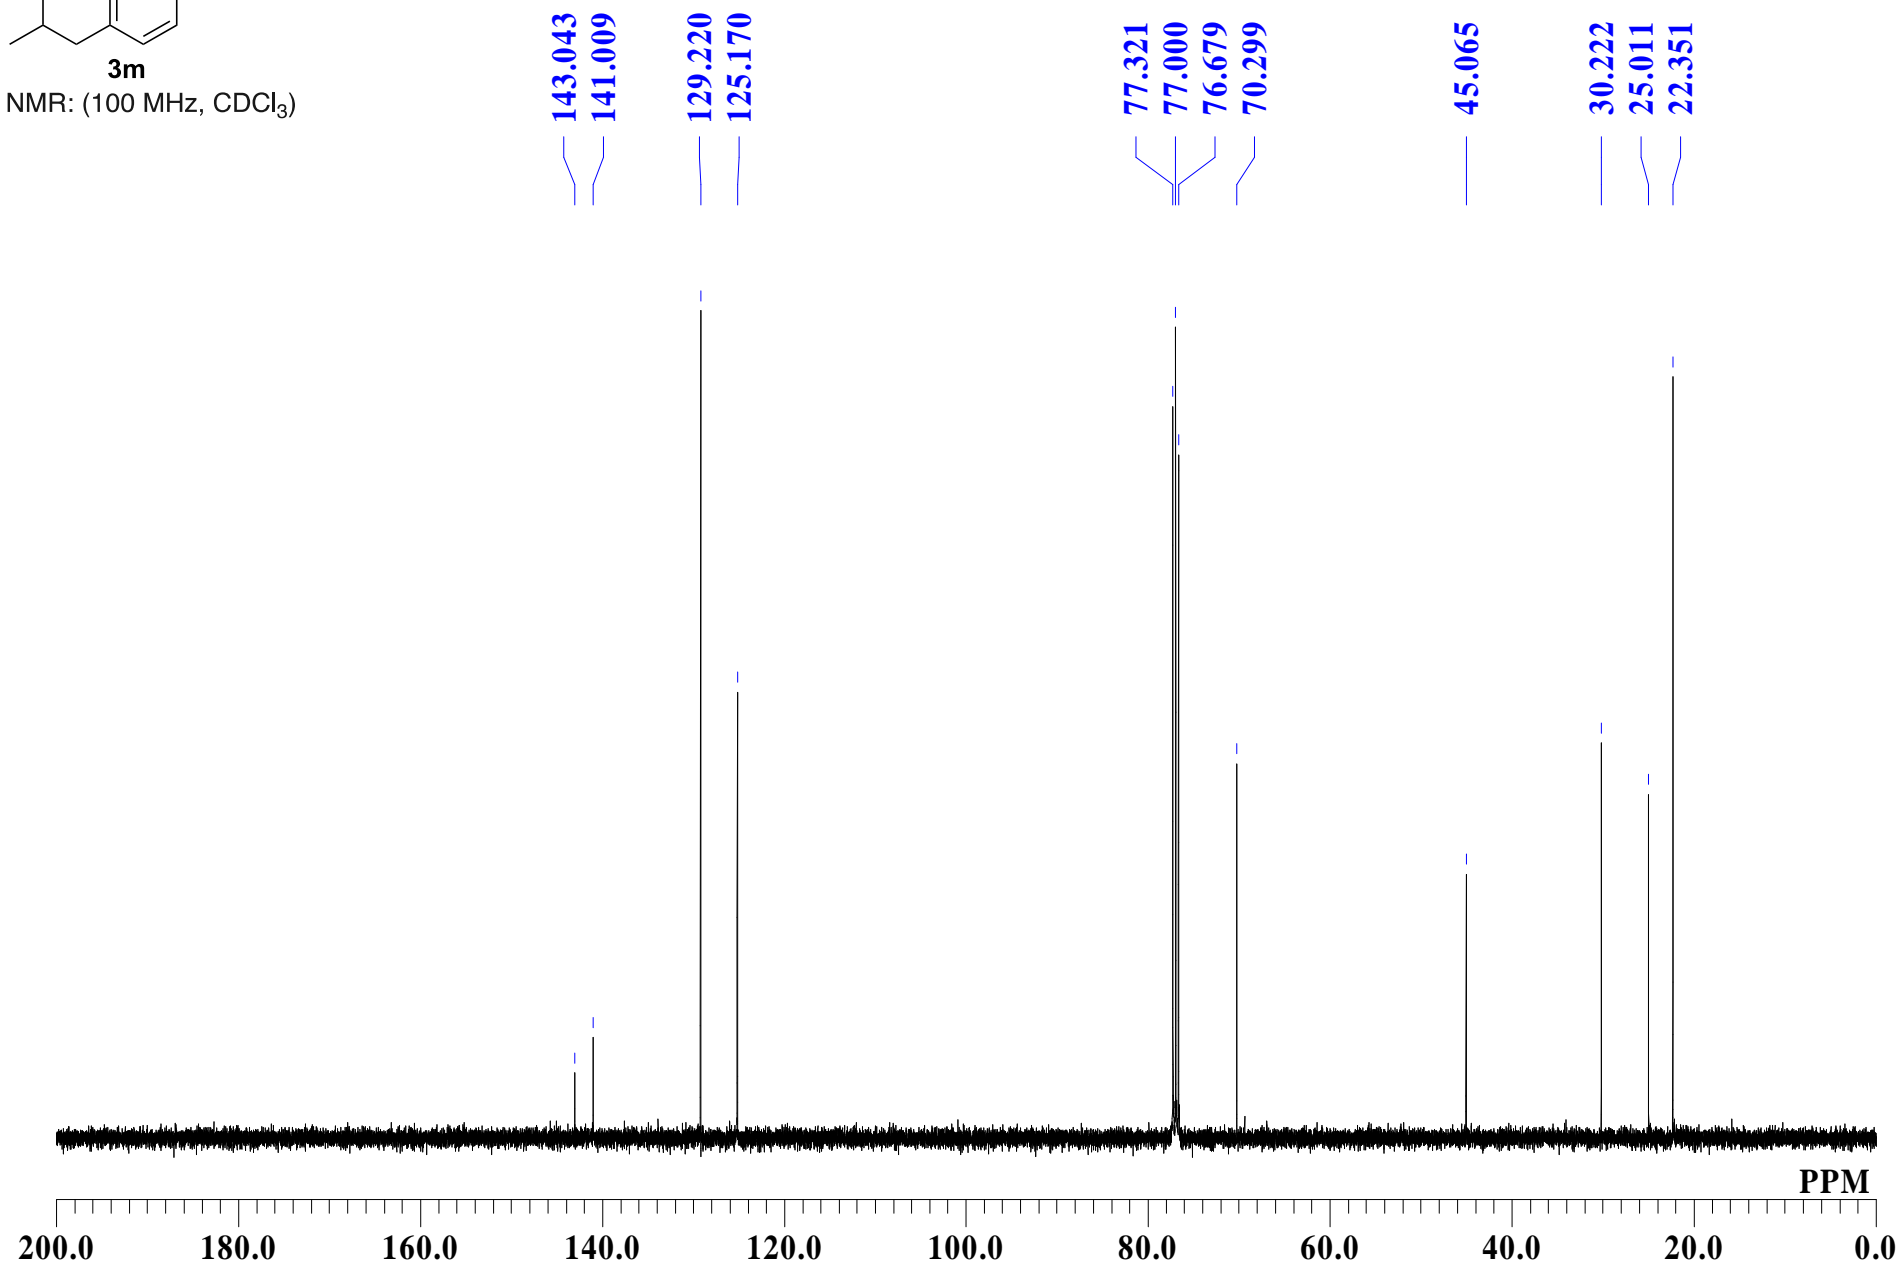

Supplement: Additional file 1 [file 1860-5397-14-92-S1.pdf]
